# Supplementary material for: Genome-Wide Discovery of Small RNAs in Mycobacterium tuberculosis
Source: PLoS One. 2012 Dec 19;7(12):e51950. doi: 10.1371/journal.pone.0051950 (PMC3526491; doi:10.1371/journal.pone.0051950)
Supplement: Table S1 — Dataset including all the candidates (A, B, C types) representing the starting point of the present work. (XLSX) [file pone.0051950.s007.xlsx]

## Sheet: Foglio1
Table S1
* to be excluded after annotation update
Candidate ID	Start	End	Strand	Type	Length	mean reads coverage	mean conservation	-10 promoter consensus	Terminator	MFE p-val	Array p-val	p-adj	Relative position to CDSs	Within	Antisense to	DistClosestGeneUP	DistClosestGeneDOWN
candidate_1	23850	23998	+	A	148	202.685	0.0101911	1	0	0.112	0.0117265	1	AS to 5'/3' UTRs		3', Rv0020c	-1594	-137
candidate_2	24046	24157	+	A	111	171.991	0	0	0	0.516	0.0244483	1	AS		Rv0020c	-1398	-296
candidate_3	24672	24787	+	A	115	520.353	0	1	0	0.28	2.40363e-14	3.10309e-11	AS		Rv0020c	-772	-926
candidate_4	24867	25274	+	A	407	443.581	0	0	1	0.903	0.000480158	0.25944	AS		Rv0020c	-577	-1413
candidate_5	50563	51056	+	A	493	1091.69	0	1	0	0.265	0	0	AS		Rv0046c	-561	-1035
candidate_6	51104	51192	+	A	88	414.124	0.443276	0	1	0.701	8.40578e-11	1.0451e-07	AS to 5'/3' UTRs		3', Rv0047c; 5', Rv0046c	-623	-1171
candidate_7	51419	51457	+	A	38	76.2051	0	0	0	0.504	0.998265	1	AS		Rv0047c	-308	-272
candidate_8	51664	51743	+	A	79	260.65	0.025883	0	0	0.2	0.999371	1	AS to 5'/3' UTRs		5', Rv0047c	-63	-558
candidate_9	51988	52108	+	A	120	195.901	0	0	0	0.993	0.0160198	1	AS		Rv0048c	-709	-280
candidate_10	74231	74261	+	A	30	117.355	0	0	0	0.62	0.0380561	1	AS		Rv0066c	-280	-1987
candidate_11	80382	80415	+	A	33	726.824	0.114001	0	0	1	0.920393	1	Intergenic			189	209
candidate_12	85206	85276	+	A	70	182.915	0	1	0	0.997	3.11304e-09	3.7948e-06	AS		Rv0076c	-366	-93
candidate_13	87687	87819	+	A	132	308.857	0.00613908	0	0	0.21	0.988551	1	AS to 5'/3' UTRs		5', Rv0078A	-114	-611
candidate_14	87932	88008	+	A	76	468.364	0.048287	0	0	0.376	0.995967	1	Intergenic			131	196
candidate_15	88167	88204	+	A	37	93.8947	0.13441	0	0	0.203	1.32117e-14	1.70827e-11	Within 5'/3' UTRs	5', Rv0079		366	0
candidate_16	151110	151140	+	A	30	271.581	0.138043	1	1	0.606	0.841438	1	Within 5'/3' UTRs	5', Rv0125		114	8
candidate_17	167440	167481	+	A	41	104.5	0	1	0	0.787	0.907935	1	AS		Rv0141c	-241	-210
candidate_18	167558	167658	+	A	100	551.733	0	0	0	0.105	0.522642	1	AS		Rv0141c	-123	-387
candidate_19	196712	196773	+	A	61	271.968	1.77968	1	0	0.108	0.681966	1	Within 5'/3' UTRs	3', Rv0166		55	88
candidate_20	210073	210123	+	A	50	181.373	0	0	0	0.858	0.565103	1	AS		Rv0179c	-739	-420
candidate_21	211325	211485	+	A	160	286.019	0	1	0	0.854	0.00130558	1	AS		Rv0180c	-925	-593
candidate_22	218357	218409	+	A	52	95.8679	0.12495	0	0	0.12	0.988353	1	AS to 5'/3' UTRs	3', Rv0186	3', Rv4014	13	296
candidate_23	219429	219486	+	A	57	165.259	0.135663	1	0	0.237	0.226695	1	Within 5'/3' UTRs	3', Rv0187; 5', Rv0188		62	0
candidate_24	219917	220058	+	A	141	662.085	0.0748542	0	0	0.017	2.01474e-06	0.00233105	AS to 5'/3' UTRs	3', Rv0188	3', Rv0189c	-1806	-62
candidate_25	235121	235170	+	A	49	237.42	0	1	0	1	0.704759	1	AS		Rv0198c	-1386	-654
candidate_26	246987	247057	+	A	70	154.732	0	0	0	0.518	0.965003	1	AS		Rv0206c	-331	-2573
candidate_27	247283	247542	+	A	259	1124.7	0.255605	1	0	0.825	3.71874e-07	0.000438439	AS to 5'/3' UTRs		3', Rv0207c; 5', Rv0206c	-829	-3058
candidate_28	266736	266769	+	A	33	144.794	0	1	0	0.123	0.998553	1	AS		Rv0223c	-1028	-468
candidate_29	293604	293662	+	A	58	616.322	1.90551	0	0	0.001	0.290447	1	Intergenic			111	136
candidate_30	298918	299099	+	A	181	626.626	0	1	0	0.5	0.000889004	0.945011	AS		Rv0248c	-1885	-236
candidate_31	299164	299201	+	A	37	64.4211	0	0	0	0.823	0.992113	1	AS		Rv0248c	-1639	-338
candidate_32	299263	299293	+	A	30	67.2258	0	1	0	0.376	0.999874	1	AS		Rv0248c	-1540	-430
candidate_33	299960	300094	+	A	134	547.807	0	0	0	0.885	0.360979	1	AS		Rv0248c	-843	-1231
candidate_34	301424	301613	+	A	189	476.868	0	0	0	0.268	0.871056	1	AS		Rv0249c	-231	-779
candidate_35	307966	308037	+	A	71	240.861	0	1	0	0.084	2.58609e-05	0.0291193	AS		Rv0256c	-1581	-160
candidate_36	308772	308816	+	A	44	219.533	0	1	0	0.105	0.139068	1	AS		Rv0256c	-775	-939
candidate_37	308938	309021	+	A	83	154.464	0	1	0	0.299	8.63695e-06	0.00982021	AS		Rv0256c	-609	-1144
candidate_38	322998	323104	+	A	106	212.692	0	1	0	0.693	0.999941	1	AS		Rv0268c	-275	-340
candidate_39	323215	323282	+	A	67	219.809	0.0162403	0	0	0.499	0.202043	1	AS to 5'/3' UTRs		5', Rv0268c	-58	-518
candidate_40	329127	329161	+	A	34	131.743	0	1	0	0.343	0.9384	1	AS		Rv0272c	-581	-586
candidate_41	331647	331696	+	A	49	757.24	0.102152	1	0	0.602	0.262211	1	AS to 5'/3' UTRs	5', Rv0276	5', Rv0275c	-11	-763
candidate_42	333375	333418	+	A	43	414.977	0.0911654	0	0	0.944	2.10238e-06	0.00242825	AS to 5'/3' UTRs		3', Rv0278c	239	19
candidate_43	341947	342078	+	A	131	670.045	0.271171	0	0	0.365	0.0100772	1	Within 5'/3' UTRs	3', Rv0281; 5', Rv0282		41	52
candidate_44	353036	353068	+	A	32	224.939	0.503349	0	0	1	0.982242	1	Within 5'/3' UTRs	3', Rv0289; 5', Rv0290		0	15
candidate_45	357611	357662	+	A	51	100.481	0	0	0	0.883	0.696923	1	AS		Rv0293c	-453	-800
candidate_46	373109	373150	+	A	41	132.69	0	1	0	0.699	0.575669	1	AS		Rv0305c	-2602	-330
candidate_47	382992	383028	+	A	36	129.676	0	0	0	0.388	0.757862	1	AS		Rv0314c	-549	-149
candidate_48	402504	402534	+	A	30	113	0	1	0	0.951	0.999013	1	AS		Rv0337c	-658	-661
candidate_49	419713	419835	+	A	122	542.268	0.555587	1	0	0.003	4.11533e-07	0.000484786	Within 5'/3' UTRs	5', Rv0350		105	0
candidate_50	442272	442322	+	A	50	133.569	0.0595479	0	0	0.944	0.0457719	1	AS to 5'/3' UTRs	5', Rv0364	5', Rv0363c	-27	-1057
candidate_51	458945	458976	+	A	31	133.5	0	1	0	0.246	0.982988	1	AS		Rv0383c	-370	-515
candidate_52	482459	482496	+	A	37	249.079	0	1	0	0.65	0.992593	1	AS		Rv0402c	-772	-2141
candidate_53	483277	483308	+	A	31	71.375	0	0	0	0.823	0.97733	1	AS		Rv0403c	-379	-80
candidate_54	498401	498455	+	A	54	381.273	0	1	0	0.217	0	0	AS		Rv0412c	-1218	-155
candidate_55	498530	498580	+	A	50	212.863	0	1	0	0.337	0.500916	1	AS		Rv0412c	-1089	-280
candidate_56	498842	498873	+	A	31	320.438	0	1	0	0.926	0.979969	1	AS		Rv0412c	-777	-573
candidate_57	510499	510534	+	A	35	164.972	0	0	0	0.819	0.999181	1	AS		Rv0424c	-153	-157
candidate_58	511762	511802	+	A	40	105.537	0	0	0	0.626	0.00489804	1	AS		Rv0425c	-3559	-1100
candidate_59	513150	513200	+	A	50	331.353	0	1	1	0.704	0.942609	1	AS		Rv0425c	-2171	-2498
candidate_60	515859	515929	+	A	70	140.634	0.0729743	1	0	0.131	0.838299	1	AS to 5'/3' UTRs		5', Rv0426c	43	88
candidate_61	530307	530346	+	A	39	168.025	0	1	0	0.748	0.00749531	1	AS	3', Rv0440	Rv0441c	-417	-50
candidate_62	530514	530563	+	A	49	110.54	0	1	1	0.943	0.851833	1	AS		Rv0441c	-210	-267
candidate_63	540234	540363	+	A	129	183.8	0	1	0	0.874	0.000211631	0.230467	AS		Rv0450c	-1257	-1775
candidate_64	541225	541278	+	A	53	294.13	0	1	0	0.79	0.971079	1	AS		Rv0450c	-266	-2690
candidate_65	541348	541384	+	A	36	112.189	0	0	0	0.969	0.715074	1	AS		Rv0450c	-143	-2796
candidate_66	541778	541817	+	A	39	287.95	0	1	0	0.877	2.33147e-15	3.02391e-12	AS		Rv0451c	-132	-329
candidate_67	545690	545825	+	A	135	1688.89	0.00189636	1	0	0.177	0.874575	1	AS to 5'/3' UTRs		5', Rv0455c	-131	-450
candidate_68	554348	554437	+	A	89	182.922	0	1	0	0.359	0.968606	1	AS		Rv0464c	-537	-124
candidate_69	554503	554591	+	A	88	121.921	0	1	0	0.323	0.02627	1	AS		Rv0464c	-382	-278
candidate_70	568353	568399	+	A	46	222.702	0	1	0	0.258	0.00335029	1	AS		Rv0479c	-614	-478
candidate_71	595018	595056	+	A	38	119.949	0	0	0	0.959	0.746488	1	AS		Rv0504c	-284	-254
candidate_72	596658	596694	+	A	36	714.892	0.138043	1	0	0.866	0.665905	1	AS to 5'/3' UTRs	5', Rv0506	3', Rv0505c	73	65
candidate_73	610916	610954	+	A	38	71.8718	0.12025	1	0	0.459	0.996966	1	Within 5'/3' UTRs	3', Rv0518		33	218
candidate_74	611034	611074	+	A	40	491.683	0.121118	0	0	0.5	0.878531	1	Intergenic			151	98
candidate_75	622157	622299	+	A	142	917.804	1.35962	1	0	0.123	0.183462	1	Within 5'/3' UTRs	3', Rv0530; 5', Rv0531		33	30
candidate_76	629877	629975	+	A	98	139.242	0.51733	1	0	0.668	0.000101543	0.111901	Within 5'/3' UTRs	5', Rv0538		146	65
candidate_77	636830	636883	+	A	53	375.315	0	0	0	0.971	0.764901	1	AS		Rv0545c	-633	-673
candidate_78	665078	665110	+	A	32	231.788	0	0	0	0.028	0.991329	1	AS		Rv0572c	-305	-68
candidate_79	665611	665695	+	A	84	177.482	0.138043	1	0	0.126	0.962785	1	AS to 5'/3' UTRs		5', Rv4004	228	156
candidate_80	665759	665790	+	A	31	201.281	0.138043	0	0	0.982	0.999734	1	AS to 5'/3' UTRs		3', Rv0573c	376	61
candidate_81	676000	676036	+	A	36	254.162	0.0868455	1	0	0.028	0.860023	1	Intergenic			84	202
candidate_82	678621	678785	+	A	164	196.206	0	0	0	0.305	0	0	AS		Rv0583c	-454	-396
candidate_83	678846	679004	+	A	158	309.277	0	0	0	0.317	0.586055	1	AS		Rv0583c	-229	-615
candidate_84	704187	704246	+	A	59	3648.93	0.131044	1	1	0.001	0	0	Intergenic			130	506
candidate_85	706101	706243	+	A	142	367.846	0	1	0	0.471	1.68262e-09	2.05616e-06	AS		Rv0611c	-243	-282
candidate_86	728649	728680	+	A	31	102.375	0	0	0	0.859	0.0400151	1	AS		Rv0632c	-629	-97
candidate_87	731676	731712	+	A	36	2368.03	0.124536	0	0	0.445	0.988704	1	Within 5'/3' UTRs	3', Rvnt07; 5', Rv0634B		0	0
candidate_88	733395	733450	+	A	55	80.9107	0.693025	1	0	0.605	4.30598e-07	0.000506383	Within 5'/3' UTRs	3', Rv0637; 5', Rvnt08		70	74
candidate_89	734222	734254	+	A	32	547.758	0.125493	0	0	0.803	0.796805	1	Within 5'/3' UTRs	3', Rv0638; 5', Rv0639		0	0
candidate_90	736978	737012	+	A	34	118.8	0	0	0	0.911	0.666358	1	AS		Rv0642c	-225	-714
candidate_91	737120	737171	+	A	51	457.327	0	1	0	0.039	0.000436725	0.47079	AS		Rv0642c	-83	-873
candidate_92	739786	739822	+	A	36	116.946	0	0	0	0.797	0.973424	1	AS		Rv0645c	-401	-495
candidate_93	740081	740134	+	A	53	152.87	0	1	1	0.782	0.581025	1	AS		Rv0645c	-106	-807
candidate_94	740191	740226	+	A	35	117.306	0.0729743	1	0	0.645	0.989389	1	AS to 5'/3' UTRs		3', Rv0646c; 5', Rv0645c	4	8
candidate_95	748168	748203	+	A	35	284.722	1.57176	0	1	0.001	0.999822	1	Within 5'/3' UTRs	5', Rv0651		223	73
candidate_96	759594	759659	+	A	65	181.5	4.41638	1	0	0.649	0.0223493	1	Intergenic			285	148
candidate_97	759764	759807	+	A	43	241.182	0.384605	0	0	0.446	0.109131	1	Within 5'/3' UTRs	5', Rv0667		455	0
candidate_98	767320	767382	+	A	62	165.111	1.6895	0	0	0.001	0.00257393	1	Within 5'/3' UTRs	3', Rv0668		0	302
candidate_99	781428	781465	+	A	37	951.237	0.568443	1	0	0.797	0.110416	1	Intergenic			117	95
candidate_100	781517	781560	+	A	43	130.409	0.134905	0	1	0.966	5.36252e-09	6.50474e-06	Within 5'/3' UTRs	5', Rv0682		206	0
candidate_101	782439	782485	+	A	46	164.83	1.17713	0	0	0.84	0.00346694	1	Within 5'/3' UTRs	3', Rv0683; 5', Rv0684		35	0
candidate_102	784631	784763	+	A	132	954.932	0.310494	0	0	0.518	0.01196	1	Within 5'/3' UTRs	3', Rv0684, 5', Rv0685		41	58
candidate_103	786036	786069	+	A	33	157.353	0.138043	0	1	0.001	0.956469	1	Within 5'/3' UTRs	3', Rv0685		25	80
candidate_104	791746	791780	+	A	34	231.486	0.28787	1	0	0.542	0.998172	1	Within 5'/3' UTRs	5', Rv0692		80	51
candidate_105	802498	802528	+	A	30	1645.26	0.663964	0	0	1	0.996304	1	Within 5'/3' UTRs	3' Rv0703; 5', Rv0704		63	0
candidate_106	806185	806218	+	A	33	92.7941	1.42029	0	0	0.001	0	0	Within 5'/3' UTRs	3', Rv0710		19	117
candidate_107	818987	819021	+	A	34	74.2286	0	1	0	0.709	0.943294	1	AS		Rv0726c	-653	-484
candidate_108	848128	848164	+	A	36	148.486	0	1	0	0.742	0.998661	1	AS		Rv0755c	-1912	-61
candidate_109	849017	849057	+	A	40	161.415	0	1	0	0.926	0.840871	1	AS		Rv0755c	-1023	-954
candidate_110	850682	850728	+	A	46	170.702	0.0302403	0	0	0.381	0.584406	1	AS to 5'/3' UTRs		3', Rv0756c; 5', Rvnt09	-31	-86
candidate_111	850820	850852	+	A	32	695.909	0	0	0	0.419	0.843588	1	AS		Rv0756c	-646	-111
candidate_112	851548	851608	+	A	60	511.77	0.649557	0	0	0.397	0.0177744	1	Within 5'/3' UTRs	5', Rv0757		82	0
candidate_113	854390	854422	+	A	32	99.9697	0	0	0	0.396	0.986872	1	AS		Rv0760c	-296	-155
candidate_114	855429	855473	+	A	44	291.489	0	1	0	0.3	0.306417	1	AS		Rv0761c	-397	-774
candidate_115	856788	856824	+	A	36	152.865	0	1	0	0.358	0.890771	1	AS		Rv0764c	-1249	-142
candidate_116	885906	885956	+	A	50	123	0	1	0	0.885	0.351917	1	AS		Rv0792c	-740	-119
candidate_117	891799	891840	+	A	41	252.952	0	1	0	0.344	0.130686	1	AS		Rv0798c	-470	-368
candidate_118	898791	898828	+	A	37	772.842	0.138043	1	1	0.14	5.64168e-05	0.0629113	Within 5'/3' UTRs	5', Rv0805		81	3
candidate_119	909369	909585	+	A	216	657.705	2.35729	0	0	0.277	0.000822715	0.877837	AS to 5'/3' UTRs		3', Rv0816c; 5', Rv0815c	51	26
candidate_120	913665	913705	+	A	40	156.293	0	1	0	0.171	0.0491601	1	AS		Rv0821c	-534	-147
candidate_121	918327	918360	+	A	33	250.059	0	0	0	0.488	0.999951	1	AS		Rv0824c	-423	-626
candidate_122	919575	919619	+	A	44	432.378	0.502507	1	0	0.727	0.910209	1	AS to 5'/3' UTRs	5', Rv0826	5', Rv0825c	22	15
candidate_123	923337	923424	+	A	87	445.273	0	1	0	0.819	0.960894	1	AS		Rv0831c	-372	-530
candidate_124	937959	938084	+	A	125	237.627	0.133911	1	0	0.012	0.00168155	1	Within 5'/3' UTRs	5', Rv0842		124	28
candidate_125	942932	942998	+	A	66	180.119	0	0	0	0.717	0.00300211	1	AS		Rv0846c	-1262	-318
candidate_126	958469	958507	+	A	38	158.615	2.76529	0	1	0.001	0	0	AS to 5'/3' UTRs	3', Rv0860	3', Rv0861c	14	16
candidate_127	967700	967731	+	A	31	474.781	0	0	0	0.687	0.994247	1	AS		Rv0870c	-33	-387
candidate_128	981220	981285	+	A	65	265.439	0.621899	0	0	0.767	0.47109	1	AS to 5'/3' UTRs		5', Rv0883c	-47	-779
candidate_129	987054	987164	+	A	110	358.297	0.138043	0	0	0.601	0.994767	1	Within 5'/3' UTRs	5', Rv0888		1083	69
candidate_130	1002780	1002812	+	A	32	288.03	0.13386	1	0	0.746	0.000260862	0.283818	AS to 5'/3' UTRs	5', Rv0899	5', Rv0898c	76	0
candidate_131	1029499	1029546	+	A	47	146.562	0.0402625	0	1	0.429	1.07131e-12	1.36592e-09	AS to 5'/3' UTRs		3', Rv0923c	-1078	-33
candidate_132	1038819	1038867	+	A	48	309.694	0	0	0	0.862	0	0	AS		Rv0931c	-1095	-947
candidate_133	1039633	1039677	+	A	44	93	0	1	0	0.784	1.41185e-05	0.0159822	AS		Rv0931c	-281	-1757
candidate_134	1039986	1040021	+	A	35	80.5556	0	1	0	0.17	0.994371	1	AS		Rv0932c	-1062	-85
candidate_135	1040645	1040938	+	A	293	1264.79	0	1	1	0.03	5.31916e-07	0.000623938	AS		Rv0932c	-403	-1002
candidate_136	1041023	1041056	+	A	33	150.088	0.0284206	0	1	0.758	0.817397	1	AS to 5'/3' UTRs		5', Rv0932c	-25	-1120
candidate_137	1061586	1061735	+	A	149	803.307	0.761163	1	0	0.609	0	0	AS to 5'/3' UTRs		5', Rv0950c	-68	-1079
candidate_138	1108205	1108277	+	A	72	515.918	0	1	0	0.671	0.576148	1	AS		Rv0991c	-299	-105
candidate_139	1108506	1108553	+	A	47	840.896	2.28051	1	0	0.883	0.905382	1	AS to 5'/3' UTRs		3', Rv0992c; 5', Rv0991c	2	25
candidate_140	1127953	1128073	+	A	120	761.752	0.505167	1	0	0.327	5.88012e-08	7.02674e-05	Within 5'/3' UTRs	3', Rv1008; 5', Rv1009		70	18
candidate_141	1133278	1133310	+	A	32	136.212	1.57524	0	0	0.001	0	0	AS to 5'/3' UTRs	3', Rv1013	3', Rv1014c	19	23
candidate_142	1144525	1144564	+	A	39	405.75	0.134592	1	0	0.678	0.369803	1	Within 5'/3' UTRs	3', Rv1022; 5', Rv1023		58	0
candidate_143	1149692	1149736	+	A	44	118.311	0	1	0	0.319	1.15719e-12	1.47425e-09	AS		Rv1028c	-1994	-632
candidate_144	1160375	1160410	+	A	35	5996	0	1	0	0.73	0.379304	1	AS		Rv1036c	-58	-315
candidate_145	1195035	1195074	+	A	39	327.8	0	0	0	0.931	0.997601	1	AS to 5'/3' UTRs		3', Rv1071c; 5', Rv1070c	-1057	-804
candidate_146	1195213	1195245	+	A	32	110.909	0	0	0	0.822	0.998011	1	AS		Rv1071c	-879	-190
candidate_147	1196177	1196279	+	A	102	197.32	0.872779	1	0	0.82	0	0	Within 5'/3' UTRs	5', Rv1072		85	0
candidate_148	1197115	1197197	+	A	82	324.916	0.225361	0	0	0.001	0	0	Within 5'/3' UTRs	3', Rv1072; 5', Rv1073		0	34
candidate_149	1200555	1200605	+	A	50	4366.27	1.32988	1	0	0.744	0	0	Intergenic			185	162
candidate_150	1224323	1224355	+	A	32	199.03	1.99957	0	1	0.001	0.997803	1	Within 5'/3' UTRs	3', Rv1095; 5', Rv1096		25	30
candidate_151	1225894	1225925	+	A	31	87.75	0	0	0	0.644	0.580621	1	AS		Rv1097c	-250	-662
candidate_152	1226093	1226126	+	A	33	107.294	0	0	0	0.169	0.323605	1	AS		Rv1097c	-51	-863
candidate_153	1230893	1231069	+	A	176	119.949	0	0	0	0.737	0	0	AS		Rv1102c, Rv1103c	-398	-409
candidate_154	1261235	1261277	+	A	42	89.2791	0	1	0	0.95	0.252601	1	AS		Rv1133c	-111	-2210
candidate_155	1261316	1261376	+	A	60	129.787	0.0520555	0	0	0.984	0.0204657	1	AS to 5'/3' UTRs		5', Rv1133c	-30	-2309
candidate_156	1261608	1261638	+	A	30	143.645	3.52136	0	0	0.28	0.999336	1	Intergenic			262	284
candidate_157	1275633	1275677	+	A	44	138.8	0.0874339	0	0	0.024	0.0688966	1	Intergenic			83	623
candidate_158	1276248	1276301	+	A	53	129.944	0.0977609	0	0	0.09	1.58261e-07	0.000187381	AS to 5'/3' UTRs		3', Rv1148c	-1500	-1
candidate_159*	1282056	1282133	+	A	77	224.974	0.176542	1	0	0.034	0.000701542	0.75065	to be excluded - intergenic			184	173
candidate_160	1282944	1282976	+	A	32	186.455	0.175637	0	0	0.651	0.620016	1	Within 5'/3' UTRs	3', Rv1156		51	80
candidate_161	1287126	1287201	+	A	75	138.171	0.138043	1	0	0.893	0	0	Intergenic			106	127
candidate_162	1298318	1298357	+	A	39	77.575	0	0	0	0.299	0.9937	1	AS		Rv1167c	-374	-270
candidate_163	1300168	1300225	+	A	57	894.052	0.138043	0	0	0.825	0.0134312	1	AS to 5'/3' UTRs	5', Rv1178	5', Rv1169c	44	79
candidate_164	1301231	1301261	+	A	30	791.581	2.78689	0	0	0.587	0.955117	1	Within 5'/3' UTRs	3', Rv1170; 5' Rv1171		16	46
candidate_165	1302856	1302896	+	A	40	816.22	0.138043	1	0	0.413	1.98677e-10	2.45366e-07	Within 5'/3' UTRs	5', Rv1173		175	35
candidate_166	1306828	1306865	+	A	37	165.342	0	0	0	0.261	0.174278	1	AS		Rv1175c	-1398	-663
candidate_167	1308924	1309005	+	A	81	1006.95	0.108364	1	0	0.908	1.58857e-11	1.99366e-08	Within 5'/3' UTRs	5', Rv1177		132	0
candidate_168	1325016	1325143	+	A	127	660.117	0	1	0	0.478	0.000501184	0.538271	AS		Rv1184c	-595	-611
candidate_169	1326145	1326204	+	A	59	1025.9	0	1	0	0.178	0.780318	1	AS		Rv1185c	-1367	-428
candidate_170	1326328	1326361	+	A	33	97.1765	0	0	0	0.573	0.998804	1	AS		Rv1185c	-1184	-585
candidate_171	1326553	1326681	+	A	128	2457.25	0	1	0	0.758	0.0121489	1	AS		Rv1185c	-959	-905
candidate_172	1326716	1326746	+	A	30	180.29	0	0	0	0.374	0.999992	1	AS		Rv1185c	-796	-970
candidate_173	1326828	1327141	+	A	313	577.016	0	0	0	0.39	0.0223471	1	AS		Rv1185c	-684	-1365
candidate_174	1338906	1338962	+	A	56	258.895	0.137231	0	0	0.393	0	0	Within 5'/3' UTRs	5', Rv1195		393	41
candidate_175	1342774	1342811	+	A	37	244.842	0.138043	1	0	0.643	0.397866	1	Intergenic			169	131
candidate_176	1342874	1342914	+	A	40	454.171	0.138043	1	0	0.688	0.00105268	1	Within 5'/3' UTRs	5', Rv1200		269	28
candidate_177	1354679	1354719	+	A	40	171.463	0	0	0	0.263	0.958168	1	AS		Rv1212c	-982	-221
candidate_178	1359196	1359268	+	A	72	203.233	0	1	0	0.789	0.724214	1	AS		Rv1215c	-248	-1509
candidate_179	1359461	1359582	+	A	121	146.844	0.0124465	1	0	0.086	2.45986e-10	3.033e-07	AS to 5'/3' UTRs		3', Rv1216c; 5', Rv1215c	-685	-110
candidate_180	1372468	1372660	+	A	192	565.71	0	1	0	0.85	0.122128	1	AS		Rv1229c	-481	-883
candidate_181	1372701	1372792	+	A	91	159.902	0	0	0	0.728	0.00136654	1	AS		Rv1229c	-248	-1015
candidate_182	1376548	1376592	+	A	44	510.311	0	1	0	0.591	1.78033e-11	2.23253e-08	AS		Rv1233c	-278	-362
candidate_183	1376687	1376720	+	A	33	237.382	0	0	0	0.106	2.776e-12	3.51997e-09	AS		Rv1233c	-139	-490
candidate_184	1392354	1392391	+	A	37	230.868	0	1	0	0.175	2.81148e-08	3.37377e-05	AS		Rv1248c	-698	-3034
candidate_185	1413189	1413225	+	A	36	197.649	1.24535	0	0	0.643	0.575294	1	Within 5'/3' UTRs	5', Rv1265		102	35
candidate_186	1419609	1419653	+	A	44	170.867	0	1	0	0.525	1.0511e-06	0.00122559	AS		Rv1270c	-139	-639
candidate_187	1436445	1436486	+	A	41	119.262	0	0	0	0.863	0	0	AS		Rv1283c	-672	-346
candidate_188	1436585	1436616	+	A	31	219.969	0	0	1	0.018	0.994476	1	AS		Rv1283c	-532	-476
candidate_189	1453007	1453060	+	A	53	217.13	2.20023	1	0	0.123	0	0	Within 5'/3' UTRs	3', Rv1296		60	144
candidate_190	1471657	1471737	+	A	80	23731.1	3.03162	1	0	0.038	0	0	Intergenic			80	109
candidate_191	1471783	1471846	+	A	63	574.016	0.135886	1	0	0.064	1.53059e-11	1.92242e-08	Within 5'/3' UTRs	5', Rvnr01		206	0
candidate_192	1473471	1473658	+	A	187	1461.84	2.95321	0	1	0.001	0	0	Within 5'/3' UTRs	5', Rvnr02		89	0
candidate_193	1476825	1476884	+	A	59	454.95	0.374894	0	0	0.111	9.4369e-16	1.22491e-12	Within 5'/3' UTRs	3', Rvnr02; 5', Rvnr03		30	15
candidate_194	1483050	1483081	+	A	31	171.5	0	1	0	0.47	0.998633	1	AS		Rv1320c	-1167	-567
candidate_195	1485626	1485773	+	A	147	1195.24	0.000827637	0	0	0.003	0.410844	1	AS to 5'/3' UTRs		5', Rv1322A	-145	-460
candidate_196	1488098	1488135	+	A	37	599.868	1.69995	0	1	0.001	0.0819085	1	AS to 5'/3' UTRs	3', Rv1324	3', Rv1325c	23	19
candidate_197	1492502	1492547	+	A	45	345.217	0	0	0	0.622	0.999568	1	AS		Rv1327c	-1923	-227
candidate_198	1492685	1492761	+	A	76	139.519	0	1	1	0.678	0.995888	1	AS		Rv1327c	-1740	-441
candidate_199	1512325	1512360	+	A	35	131.778	0	1	0	0.797	0.994523	1	AS		Rv1347c	-280	-387
candidate_200	1519949	1519979	+	A	30	107.226	0	0	0	0.975	0.975381	1	AS		Rv1353c	-36	-779
candidate_201	1521439	1521469	+	A	30	105.968	0	1	0	0.981	0.998307	1	AS		Rv1354c	-437	-1464
candidate_202	1535446	1535558	+	A	112	398.124	0.508345	1	0	0.997	0.980619	1	AS to 5'/3' UTRs		5', Rv1363c	54	125
candidate_203	1538142	1538176	+	A	34	80.2857	0.0236645	0	0	0.473	0.935217	1	AS to 5'/3' UTRs		5', Rv1365c	-27	-393
candidate_204	1547634	1547677	+	A	43	484.432	0.138043	1	0	0.32	5.0191e-10	6.17349e-07	Intergenic			104	155
candidate_205	1561400	1561464	+	A	64	919.215	0.135919	1	0	0.953	0.230572	1	Within 5'/3' UTRs	5', Rv1386		131	0
candidate_206	1565027	1565083	+	A	56	272.316	0.0979588	0	0	0.946	9.04052e-05	0.0998073	Within 5'/3' UTRs	3', Rv1389; 5', Rv1390		0	10
candidate_207	1568060	1568094	+	A	34	688.914	1.6681	0	1	0.001	0.630497	1	AS to 5'/3' UTRs	3', Rv1392	3', Rv1393c	24	15
candidate_208	1574731	1574765	+	A	34	242.886	0	0	0	0.491	0.953109	1	AS		Rv1398c	-36	-255
candidate_209	1603966	1604006	+	A	40	71.0732	0	0	0	0.133	3.01474e-05	0.0339158	AS		Rv1428c	-793	-74
candidate_210	1623572	1623608	+	A	36	519.541	0	0	0	0.274	0.16663	1	AS		Rv1444c	-125	-321
candidate_211	1625198	1625243	+	A	45	98.2174	0	1	0	0.537	0.000119919	0.132031	AS		Rv1446c	-167	-789
candidate_212	1627210	1627255	+	A	45	119.174	0	1	0	0.503	0.00583678	1	AS		Rv1448c	-870	-296
candidate_213	1627309	1627340	+	A	31	208.062	0	0	0	0.643	0.999873	1	AS		Rv1448c	-771	-381
candidate_214	1628713	1628757	+	A	44	164.222	0	0	0	0.553	0.000482079	0.518235	AS		Rv1449c	-1486	-660
candidate_215	1640048	1640110	+	A	62	318.333	0	0	0	0.464	0.989855	1	AS		Rv1454c	-612	-436
candidate_216	1658949	1658980	+	A	31	377.625	0.133729	0	0	0.602	0.00557067	1	Within 5'/3' UTRs	3', Rv1469; 5', Rv1470		13	0
candidate_217	1664976	1665015	+	A	39	150.475	0	1	0	0.714	0.699061	1	AS		Rv1475c	-1070	-1800
candidate_218	1682094	1682129	+	A	35	74.1111	0.273342	1	0	0.837	0.355556	1	Within 5'/3' UTRs	5', Rv1492		128	28
candidate_219	1689397	1689439	+	A	42	146.07	0	0	0	0.457	0.983622	1	AS		Rv1498c	-523	-136
candidate_220	1690164	1690195	+	A	31	106.906	0	0	0	0.818	0.991146	1	AS		Rv1498A	-182	-61
candidate_221	1696852	1696970	+	A	118	202.882	0	1	0	0.647	0.734131	1	AS		Rv1507c	-570	-243
candidate_222	1698969	1699001	+	A	32	197.091	0	0	0	0.718	0.989427	1	AS		Rv1508c	-925	-906
candidate_223	1727239	1727281	+	A	42	146.279	0	1	0	0.811	0.0448399	1	AS		Rv1527c	-1170	-5198
candidate_224	1735693	1735747	+	A	54	107.473	0.253375	0	0	0.131	6.64108e-09	8.04899e-06	Intergenic			282	229
candidate_225	1735850	1735976	+	A	126	192.409	0.328719	0	0	0.023	4.10783e-15	5.32374e-12	Within 5'/3' UTRs	5', Rv1535		439	0
candidate_226	1773185	1773234	+	A	49	540.22	0	0	0	0.302	0.783433	1	AS		Rv1565c	-644	-1594
candidate_227	1775121	1775180	+	A	59	86.1833	0.0638727	0	0	0.491	0.544213	1	AS to 5'/3' UTRs		5', Rv1567c	-23	-320
candidate_228	1786244	1786276	+	A	32	476.091	0	1	0	0.008	6.68454e-11	8.33562e-08	AS		Rv1583c	-66	-364
candidate_229	1793753	1793877	+	A	124	371.328	0.133368	1	0	0.418	0.99977	1	AS to 5'/3' UTRs		5', Rv1592c	13	120
candidate_230	1824349	1824414	+	A	65	761.424	0.0271903	1	0	0.332	0.123542	1	AS to 5'/3' UTRs		3', Rv1623c; 5', Rv1622c	-51	-1054
candidate_231	1824549	1824600	+	A	51	174.808	0	0	0	0.655	0.547478	1	AS		Rv1623c	-1338	-170
candidate_232	1825836	1825928	+	A	92	167.72	0.0865326	0	0	0.278	0.0162934	1	AS to 5'/3' UTRs		3', Rv1624c; 5', Rv1623c	-51	-1498
candidate_233	1826479	1826536	+	A	57	230.31	0	0	0	0.99	0.358214	1	AS		Rv1624c	-106	-538
candidate_234	1828813	1828848	+	A	35	167.389	1.26929	0	0	0.001	0.988507	1	AS to 5'/3' UTRs	3', Rv1626	3', Rv1627c	16	17
candidate_235	1833493	1833542	+	A	49	3771.96	2.55198	1	0	0.301	0.0014258	1	Within 5'/3' UTRs	5', Rv15630		114	0
candidate_236	1842408	1842448	+	A	40	217.951	1.18608	1	0	0.097	0.000932546	0.989431	Within 5'/3' UTRs	5', Rv1636		166	3
candidate_237	1851991	1852022	+	A	31	764.594	0	1	0	0.008	8.40114e-11	1.0451e-07	AS		Rv1640c	-44	-3505
candidate_238	1852878	1852927	+	A	49	246.72	0.132521	0	0	0.255	0.827176	1	Within 5'/3' UTRs	3', Rv1641; 5', Rv1642		0	1
candidate_239	1853149	1853184	+	A	35	259	0.833256	0	0	0.297	0.0109003	1	Within 5'/3' UTRs	3', Rv1642; 5', Rv1643		27	0
candidate_240	1855699	1855741	+	A	42	359.465	0.138043	1	0	0.827	0	0	Within 5'/3' UTRs	5', Rv1646		245	23
candidate_241	1864044	1864146	+	A	102	146.689	0	1	0	0.172	2.10505e-10	2.59763e-07	AS		Rv1651c	-1338	-1799
candidate_242	1864224	1864254	+	A	30	128.419	0	0	1	0.677	0.883008	1	AS		Rv1651c	-1158	-1907
candidate_243	1915012	1915192	+	A	180	382.834	0.138043	0	0	0.176	0.166474	1	Intergenic			136	335
candidate_244	1960667	1960828	+	A	161	8388.07	0.0704356	0	0	0.001	0	0	AS to 5'/3' UTRs		3', Rv1734c	-349	-54
candidate_245	1960933	1960963	+	A	30	71.4194	0	0	0	0.999	0.983269	1	AS		Rv1734c	-83	-189
candidate_246	1961075	1961142	+	A	67	88.2647	0.138043	0	1	0.16	1	1	AS to 5'/3' UTRs		5', Rv1734c	59	149
candidate_247	1962252	1962372	+	A	120	111.884	0	0	0	0.648	0.158131	1	AS		Rv1736c	-1934	-144
candidate_248	1965576	1965618	+	A	42	171	0.0715899	0	0	0.563	0.000361382	0.391015	Within 5'/3' UTRs	5', Rv1738		206	39
candidate_249	1965941	1966052	+	A	111	634.062	0	0	0	0.055	0.920028	1	AS to 5'/3' UTRs	3', Rv1738	3', Rv1739c	-1696	-97
candidate_250	1966377	1966417	+	A	40	154.634	0	0	0	0.749	0.0708605	1	AS		Rv1739c	-1260	-462
candidate_251	1985342	1985382	+	A	40	171.488	0	0	0	0.474	0.248501	1	AS		Rv1754c	-1328	-403
candidate_252	1999540	1999585	+	A	45	201.761	0.114001	0	0	0.859	1.03422e-10	1.28347e-07	Intergenic			183	152
candidate_253	2012661	2012705	+	A	44	164.178	0.0766905	1	0	0.574	1.86794e-08	2.2546e-05	AS to 5'/3' UTRs		3', Rv1779c	-1818	-19
candidate_254	2012850	2013005	+	A	155	573.365	0	0	0	0.924	0.336171	1	AS		Rv1779c	-1629	-319
candidate_255	2030215	2030256	+	A	41	177.81	0.138043	0	0	0.638	1.24581e-07	0.000147878	Within 5'/3' UTRs	3', Rv1791		12	91
candidate_256	2030309	2030341	+	A	32	88.8485	0.138043	0	0	0.879	0.961795	1	Within 5'/3' UTRs	5', Rv1792		106	6
candidate_257	2030643	2030694	+	A	51	1278.6	0.816984	0	0	0.368	0.832028	1	Within 5'/3' UTRs	3', Rv1792; 5', Rv1793		0	0
candidate_258	2030980	2031066	+	A	86	536.483	1.16004	0	0	0.002	0.206628	1	Within 5'/3' UTRs	3', Rv1793; 5', Rv1794		2	0
candidate_259	2047002	2047044	+	A	42	202.953	0.0674163	1	0	0.894	8.88178e-16	1.15374e-12	AS to 5'/3' UTRs		3', Rv1804c	-347	-21
candidate_260	2052852	2052888	+	A	36	117.189	0.13212	0	0	0.515	0.997648	1	Within 5'/3' UTRs	5', Rv1810		164	45
candidate_261	2055233	2055295	+	A	62	278.921	0	1	0	0.52	0.8814	1	AS		Rv1812c	-126	-1138
candidate_262	2055326	2055448	+	A	122	273.927	0.0987623	0	1	0.599	0.306459	1	AS to 5'/3' UTRs		5', Rv1812c	-33	-1291
candidate_263	2055957	2056234	+	A	277	299.025	0.0600834	0	0	0.109	5.84529e-11	7.30076e-08	AS to 5'/3' UTRs		5', Rv1813c	-155	-553
candidate_264	2068914	2068955	+	A	41	87.8571	0.568656	0	1	0.015	1.39888e-14	1.80735e-11	Within 5'/3' UTRs	3', Rv1821		31	125
candidate_265	2072357	2072394	+	A	37	167.474	0.604398	1	0	0.879	0.0680283	1	Within 5'/3' UTRs	3', Rv1826		1	202
candidate_266	2072429	2072525	+	A	96	714.515	0.138043	0	0	0.397	1.59291e-06	0.00184936	Within 5'/3' UTRs	3', Rv1826; 5', Rv1827		73	71
candidate_267	2084473	2084568	+	A	95	261.635	0	1	0	0.688	0.98982	1	AS		Rv1836c	-163	-1965
candidate_268	2096760	2096857	+	A	97	116.959	3.06107	1	1	0.012	9.77673e-12	1.22991e-08	Within 5'/3' UTRs	5', Rv1847		161	20
candidate_269	2102925	2102960	+	A	35	89.9167	0	0	0	0.357	0.039536	1	AS		Rv1854c	-117	-1309
candidate_270	2111229	2111274	+	A	45	348.935	0	0	0	0.793	6.4837e-14	8.33156e-11	AS		Rv1863c	-132	-683
candidate_271	2111305	2111335	+	A	30	100.387	0	0	0	0.834	0.99479	1	AS		Rv1863c	-56	-744
candidate_272	2135131	2135185	+	A	54	772.382	0	0	0	0.43	0.00478952	1	AS		Rv1886c	-736	-295
candidate_273	2136128	2136258	+	A	130	1787.83	0.26596	1	0	0.972	0	0	Within 5'/3' UTRs	5', Rv1887		261	0
candidate_274	2144426	2144457	+	A	31	97.125	0	0	0	0.458	0.99986	1	AS to 5'/3' UTRs		3', Rv1897c; 5', Rv1896c	-456	-922
candidate_275	2150834	2150866	+	A	32	126.273	0.138043	1	0	0.216	0.561923	1	Within 5'/3' UTRs	3', Rv1903		66	88
candidate_276	2178976	2179032	+	A	56	191.684	0	1	0	0.278	0.47721	1	AS	3', Rv1925	Rv1926c	-460	-75
candidate_277	2201249	2201322	+	A	73	992.392	0	0	0	0.227	0.000575048	0.615877	AS	3', Rv1953	Rv1954c	-495	-99
candidate_278	2222358	2222416	+	A	58	271.034	0	1	0	0.542	0.5927	1	AS		Rv1979c	-806	-697
candidate_279	2223174	2223214	+	A	40	234.39	0.114001	1	0	0.221	0.998158	1	AS to 5'/3' UTRs		5', Rv1979c	10	129
candidate_280	2223680	2223955	+	A	275	343.004	0	0	0	0.199	0	0	AS		Rv1980c	-349	-612
candidate_281	2224000	2224064	+	A	64	166.723	0.277822	0	0	0.81	0.99973	1	AS to 5'/3' UTRs		5', Rv1980c	-29	-721
candidate_282	2224100	2224154	+	A	54	79.7091	0.0774792	0	0	0.154	0.926808	1	AS to 5'/3' UTRs		3', Rv1981c; 5', Rv1980c	71	66
candidate_283	2225305	2225337	+	A	32	220.576	0.114001	0	0	0.687	0.96578	1	AS to 5'/3' UTRs		3', Rv1982c	117	76
candidate_284	2228095	2228125	+	A	30	287.194	0	0	0	0.758	0.999936	1	AS		Rv1984c	-466	-217
candidate_285	2228719	2228751	+	A	32	168.576	0.0553123	0	1	0.356	0.997734	1	Intergenic			158	240
candidate_286	2232679	2232719	+	A	40	237.268	0.138043	1	0	0.725	5.73871e-10	7.04713e-07	AS to 5'/3' UTRs		3', Rv1989c	460	20
candidate_287	2243160	2243210	+	A	50	277.176	0	0	0	0.278	0.253699	1	AS		Rv1998c	-561	-265
candidate_288	2243328	2243359	+	A	31	1341.72	0	0	0	0.497	0.999992	1	AS		Rv1998c	-393	-414
candidate_289	2251223	2251297	+	A	74	886.36	0	1	0	0.331	0.996452	1	AS		Rv2005c	-660	-301
candidate_290	2251345	2251392	+	A	47	120.312	0	0	0	0.576	0.993334	1	AS		Rv2005c	-538	-396
candidate_291	2251667	2251715	+	A	48	268.143	0	0	1	0.59	0.933385	1	AS		Rv2005c	-216	-719
candidate_292	2256383	2256433	+	A	50	680.431	0.0108269	1	0	0.431	0.850903	1	AS to 5'/3' UTRs		5', Rv2007c	-45	-349
candidate_293	2267109	2267203	+	A	94	887.432	0	1	0	0.158	0.997944	1	AS to 5'/3' UTRs		3', Rv2022c; 5', Rv2021c	-615	-398
candidate_294	2268166	2268257	+	A	91	2390.95	0.122164	1	0	0.006	0	0	AS to 5'/3' UTRs		3', Rv2023A; 5', Rv2023c	58	11
candidate_295	2277651	2277776	+	A	125	292.31	0	0	0	0.852	0.725355	1	AS		Rv2030c	-835	-1335
candidate_296	2278596	2278791	+	A	195	555.276	0	1	0	0.288	1	1	AS		Rv2031c	-336	-293
candidate_297	2288950	2289114	+	A	164	494.036	0	1	0	0.829	0.000523893	0.562137	AS		Rv2043c	-291	-433
candidate_298	2307708	2307789	+	A	81	424.768	0.138043	1	0	0.926	1.72078e-06	0.0019961	Within 5'/3' UTRs	5', Rv2050		191	32
candidate_299	2337869	2337997	+	A	128	544.008	0.0762892	0	0	0.492	0.534457	1	AS to 5'/3' UTRs	3', Rv2080	3', Rv2081c	0	68
candidate_300	2338467	2338628	+	A	161	425.883	0.0998431	0	1	0.341	0.97171	1	AS to 5'/3' UTRs		5', Rv2081c	-38	-563
candidate_301	2348573	2348622	+	A	49	402.58	0	1	0	0.785	0.218841	1	AS	3', Rv2090	Rv2091c	-719	-64
candidate_302	2356002	2356038	+	A	36	160.649	0	0	0	0.448	0.955804	1	AS		Rv2097c	-675	-719
candidate_303	2356153	2356193	+	A	40	226.927	0	0	0	0.338	0.10451	1	AS		Rv2097c	-524	-874
candidate_304	2356314	2356382	+	A	68	193.58	0	1	0	0.997	0.687254	1	AS		Rv2097c	-363	-1063
candidate_305	2368522	2368562	+	A	40	175.073	0.138043	0	0	0.902	0.895459	1	Intergenic			80	421
candidate_306	2369356	2369397	+	A	41	162.286	0	1	0	0.757	0.585003	1	AS		Rv2109c	-373	-414
candidate_307	2369447	2369486	+	A	39	103.5	0	1	0	0.375	0.000273141	0.296632	AS		Rv2109c	-282	-503
candidate_308	2369996	2370044	+	A	48	134.306	0	1	0	0.676	0.887797	1	AS		Rv2110c	-605	-318
candidate_309	2376084	2376123	+	A	39	180.125	0	1	0	0.527	1.26475e-07	0.000149999	AS		Rv2115c	-206	-1662
candidate_310	2392027	2392089	+	A	62	434.905	0	1	0	0.844	5.73135e-06	0.00655093	AS		Rv2130c	-432	-874
candidate_311	2397086	2397129	+	A	43	103.341	0	1	0	0.957	0.979414	1	AS		Rv2137c	-229	-227
candidate_312	2397263	2397308	+	A	45	110.217	0	1	0	0.345	2.1752e-12	2.76033e-09	AS	5', Rv2138	Rv2137c	-52	-406
candidate_313	2405456	2405545	+	A	89	416.256	3.3901	0	0	0.458	0.997882	1	AS to 5'/3' UTRs		5', Rv2145c	58	121
candidate_314	2405947	2405985	+	A	38	110.333	0.0728868	0	0	0.897	0.999555	1	AS to 5'/3' UTRs		5', Rv2146c	-9	-319
candidate_315	2425740	2425821	+	A	81	360.329	0	1	0	0.662	0.99793	1	AS		Rv2163c	-1347	-773
candidate_316	2432029	2432083	+	A	54	81.2364	3.08312	0	0	0.752	0.39116	1	AS to 5'/3' UTRs		5', Rv2169c	60	152
candidate_317	2442962	2443046	+	A	84	123.082	0	1	0	0.742	3.24304e-09	3.95002e-06	AS		Rv2180c	-252	-719
candidate_318	2445345	2445401	+	A	56	115.737	1.08217	0	0	0.443	0.981135	1	AS to 5'/3' UTRs		3', Rv2183c; 5', Rv2182c	16	14
candidate_319	2447446	2447522	+	A	76	474.857	0.037648	1	0	0.665	0.096659	1	AS to 5'/3' UTRs		5', Rv2185c	-54	-456
candidate_320	2464054	2464098	+	A	44	145.111	0	1	0	0.334	0.942059	1	AS		Rv2200c	-697	-438
candidate_321	2464382	2464414	+	A	32	164.545	0	0	0	0.519	0.999814	1	AS		Rv2200c	-369	-754
candidate_322	2468169	2468210	+	A	41	117.5	0.292671	1	0	0.214	0.999721	1	Within 5'/3' UTRs	5', Rv2208		142	21
candidate_323	2468960	2469036	+	A	76	120.584	0	0	0	0.256	0.0139797	1	AS	3', Rv2208	Rv2204c	-327	-105
candidate_324	2473323	2473359	+	A	36	816.811	0.138043	0	0	0.49	0.961164	1	Within 5'/3' UTRs	5', Rv2209		81	41
candidate_325	2497711	2497741	+	A	30	94.8387	1.82466	0	0	0.775	0.986542	1	Within 5'/3' UTRs	5', Rv2225		688	1
candidate_326	2511592	2511647	+	A	55	426.214	0	0	0	0.442	0.409163	1	AS		Rv2239c	-60	-471
candidate_327	2512164	2512204	+	A	40	73.9512	0	1	0	0.803	0.455443	1	AS		Rv2240c	-323	-514
candidate_328	2517695	2517771	+	A	76	2606.95	0.891553	0	0	0.982	0	0	Within 5'/3' UTRs	3', Rv2243; 5', Rv2244		0	0
candidate_329	2520712	2520743	+	A	31	235.438	0.125101	0	0	0.572	0.949266	1	Within 5'/3' UTRs	3', Rv2246; 5', Rv2247		0	0
candidate_330	2522164	2522218	+	A	54	190.909	2.01064	0	1	0.047	0.7114	1	Within 5'/3' UTRs	3', Rv2247		0	142
candidate_331	2529794	2529865	+	A	71	136.097	0	1	0	0.642	0.977333	1	AS		Rv2256c	-80	-524
candidate_332	2570234	2570264	+	A	30	520	0	0	0	0.143	0.870852	1	AS		Rv2299c	-1768	-205
candidate_333	2580242	2580303	+	A	61	296.419	0.134096	0	0	0.66	0.885988	1	AS to 5'/3' UTRs		5', Rv2307D	32	116
candidate_334	2602077	2602148	+	A	71	484.806	0	1	0	0.116	0.970893	1	AS		Rv2329c	-1384	-234
candidate_335	2602331	2602361	+	A	30	91.2581	0	0	0	0.867	0.839298	1	AS		Rv2329c	-1130	-447
candidate_336	2602818	2602854	+	A	36	428.405	0	1	0	0.748	0.997479	1	AS		Rv2329c	-643	-940
candidate_337	2618924	2618955	+	A	31	268.406	0.12249	1	0	0.967	0.989767	1	AS to 5'/3' UTRs		5', Rv2340c	16	452
candidate_338	2625822	2625899	+	A	77	318.859	0.116805	1	0	0.075	9.29693e-05	0.102545	AS to 5'/3' UTRs	3', Rv2345	3', Rv2346c	-350	-11
candidate_339	2626669	2626776	+	A	107	751.083	0	0	0	0.545	0.999142	1	AS		Rv2348c	-311	-122
candidate_340	2626892	2626939	+	A	47	143.979	0	0	0	0.494	0.98893	1	AS		Rv2348c	-88	-285
candidate_341	2637685	2637749	+	A	64	517.415	0.00420763	0	1	0.943	0.565884	1	AS to 5'/3' UTRs		3', Rv2356c	-1850	-61
candidate_342	2640337	2640367	+	A	30	126.323	0	0	0	0.107	0.964438	1	AS		Rv2357c	-727	-694
candidate_343	2641083	2641121	+	A	38	150.949	0.437059	0	0	0.069	0.98904	1	AS to 5'/3' UTRs		5', Rv2357c	19	125
candidate_344	2649665	2649696	+	A	31	117.312	0	1	0	0.515	0.00688418	1	AS		Rv2368c	-309	-780
candidate_345	2649729	2649759	+	A	30	98.9677	0	0	0	0.588	0.139435	1	AS		Rv2368c	-245	-843
candidate_346	2649891	2649927	+	A	36	83.027	0	0	0	0.154	0.178238	1	AS		Rv2368c	-83	-1011
candidate_347	2650002	2650035	+	A	33	165.676	0	0	0	0.318	0.999651	1	AS		Rv2369c	-246	-89
candidate_348	2654218	2654262	+	A	44	240.222	0	1	0	0.204	0.987464	1	AS		Rv2374c	-875	-200
candidate_349	2655211	2655262	+	A	51	188.712	0.138043	1	0	0.675	0.951746	1	Within 5'/3' UTRs	5', Rv2375		118	3
candidate_350	2692190	2692259	+	A	69	244	0.119782	0	0	0.644	0	0	Intergenic			115	540
candidate_351	2692748	2692799	+	A	51	254.673	0.0715709	1	0	0.831	1.66533e-16	2.1716e-13	Within 5'/3' UTRs	5', Rv2396		673	0
candidate_352	2695933	2695964	+	A	31	119.844	0	0	0	0.363	0.997767	1	AS		Rv2399c	-714	-168
candidate_353	2704419	2704449	+	A	30	187.258	0.0360236	0	0	0.957	0.998962	1	AS to 5'/3' UTRs		5', Rv2406c	-18	-440
candidate_354	2710335	2710432	+	A	97	129.082	0	0	1	0.159	0.960087	1	AS to 5'/3' UTRs	3', Rv2412	3', Rv2413c	-966	-81
candidate_355	2727422	2727602	+	A	180	549.337	0	1	0	0.64	0.0502316	1	AS		Rv2430c	-498	-266
candidate_356	2727634	2727673	+	A	39	241.6	0	1	0	0.493	0.99341	1	AS		Rv2430c	-286	-337
candidate_357	2727914	2728140	+	A	226	1642.32	0.0201253	1	0	0.796	3.70154e-05	0.0415313	AS to 5'/3' UTRs		3', Rv2431c; 5', 2430c	-352	-804
candidate_358	2728389	2728500	+	A	111	472.366	0.0591612	0	0	0.355	0.302314	1	AS to 5'/3' UTRs		3', Rv2432c	-458	-63
candidate_359	2744423	2744483	+	A	60	310.721	0	1	0	0.747	0.0109927	1	AS		Rv2444c	-561	-2360
candidate_360	2744543	2744603	+	A	60	362.246	0	0	1	0.732	0.92998	1	AS		Rv2444c	-441	-2480
candidate_361	2752760	2752793	+	A	33	187.324	0.138043	1	0	0.894	0.999848	1	AS to 5'/3' UTRs		3', Rv2452c	100	55
candidate_362	2754250	2754293	+	A	43	538.364	0	1	0	0.896	0.0662659	1	AS		Rv2454c	-496	-668
candidate_363	2755097	2755213	+	A	116	304.607	0	0	0	0.599	0.919537	1	AS		Rv2455c	-1607	-470
candidate_364	2758998	2759038	+	A	40	802.22	0	1	0	0.372	0.577916	1	AS		Rv2457c	-490	-830
candidate_365	2759305	2759335	+	A	30	127.903	0	0	0	0.228	0.798203	1	AS		Rv2457c	-183	-1127
candidate_366	2759586	2759618	+	A	32	172.727	1.30448	1	0	0.368	0.990064	1	Intergenic			98	161
candidate_367	2760808	2760852	+	A	44	104.178	0.075175	0	0	0.79	0.0101984	1	Within 5'/3' UTRs	5', Rv2459		121	2
candidate_368	2762959	2763189	+	A	230	800.857	0	0	0	0.693	0.0878714	1	AS		Rv2460c, Rv2461c	-815	-658
candidate_369	2763850	2763908	+	A	58	255.627	1.69384	1	0	0.759	0.989322	1	AS to 5'/3' UTRs		3', Rv2462c	-1441	-17
candidate_370	2763973	2764013	+	A	40	238.439	0	0	0	0.964	0.991806	1	AS		Rv2462c	-1318	-122
candidate_371	2765507	2765541	+	A	34	1209.77	1.21414	1	0	0.288	0.992061	1	Within 5'/3' UTRs	5', Rvnt27		103	0
candidate_372	2772268	2772332	+	A	64	1781.63	0.101521	1	0	0.121	0.930681	1	AS to 5'/3' UTRs		3', Rv2469c	121	35
candidate_373	2782871	2782901	+	A	30	303.194	0	0	0	0.986	0.998417	1	AS		Rv2477c	-1171	-535
candidate_374	2782995	2783031	+	A	36	84.6216	0	0	0	0.898	4.20274e-07	0.000494662	AS		Rv2477c	-1047	-665
candidate_375	2810205	2810288	+	A	83	277.548	0	0	0	0.664	0.266067	1	AS		Rv2496c	-777	-352
candidate_376	2814543	2814576	+	A	33	350.647	0	0	0	0.233	0.985541	1	AS		Rv2500c	-368	-849
candidate_377	2814885	2814991	+	A	106	426.308	0	1	1	0.67	0.988041	1	AS to 5'/3' UTRs		3', Rv501c; 5', Rv2500c	-1995	-1264
candidate_378	2817011	2817049	+	A	38	710.821	0	1	0	0.228	0.719685	1	AS		Rv2502c	-1463	-164
candidate_379	2820897	2820950	+	A	53	135.981	0	1	0	0.934	0.744915	1	AS		Rv2505c	-699	-997
candidate_380	2833683	2833724	+	A	41	72.3333	0	0	0	0.591	0.85519	1	AS		Rv2517c	-78	-214
candidate_381	2837409	2837439	+	A	30	258.645	0	0	0	1	0.128889	1	AS		Rv2520c	-206	-51
candidate_382	2837606	2837647	+	A	41	243.238	0.101889	0	1	0.754	0.389382	1	AS to 5'/3' UTRs	5', Rv2521	5', Rv2520c	-9	-259
candidate_383	2850140	2850171	+	A	31	147.781	0	1	0	0.323	5.85105e-08	6.99786e-05	AS		Rv2525c	-434	-319
candidate_384	2861938	2861971	+	A	33	143.059	0	1	0	0.163	0.584975	1	AS		Rv2538c	-738	-383
candidate_385	2876445	2876475	+	A	30	77.871	0	0	0	0.036	0.995113	1	AS		Rv2555c	-40	-2704
candidate_386	2880045	2880075	+	A	30	215.355	0.13359	1	1	0.805	0.158725	1	Within 5'/3' UTRs	5', Rv2560		116	0
candidate_387	2906547	2906592	+	A	45	120.13	0	0	0	0.986	0.478813	1	AS		Rv2581c	-216	-503
candidate_388	2911259	2911315	+	A	56	728.947	0	1	0	0.864	0.062925	1	AS		Rv2585c	-1418	-311
candidate_389	2913406	2913524	+	A	118	402.277	0	1	0	0.137	0	0	AS		Rv2586c	-605	-841
candidate_390	2913572	2913651	+	A	79	108.075	0	0	0	0.904	0.003008	1	AS		Rv2586c	-439	-968
candidate_391	2914483	2914542	+	A	59	114.967	0	0	0	0.794	0.974868	1	AS		Rv2587c	-1253	-527
candidate_392	2932814	2932876	+	A	62	137.476	0	1	0	0.58	0.154546	1	AS		Rv2605c	-328	-579
candidate_393	2933722	2933813	+	A	91	180.533	0	1	0	0.137	0.903609	1	AS		Rv2606c	-348	-642
candidate_394	2937983	2938017	+	A	34	183.743	0	0	0	0.711	0.914544	1	AS		Rv2610c	-1018	-152
candidate_395	2949539	2949593	+	A	54	263.6	0.135533	1	0	0.573	2.77556e-16	3.611e-13	Within 5'/3' UTRs	5', Rv2623		82	0
candidate_396	2950486	2950907	+	A	421	1109.4	0	0	0	0.565	0.00231834	0	AS to 5'/3' UTRs	3', Rv2623	3', Rv2624c	-821	-418
candidate_397	2950969	2951006	+	A	37	109.474	0	0	0	0.289	0.949819	1	AS		Rv2624c	-338	-517
candidate_398	2951702	2951735	+	A	33	353.853	0	0	0	0.838	0.997651	1	AS		Rv2625c	-801	-413
candidate_399	2952150	2952216	+	A	66	271.687	0	0	0	0.355	0.616542	1	AS		Rv2625c	-353	-894
candidate_400	2952409	2952448	+	A	39	1559	0	1	1	0.078	0.877778	1	AS		Rv2625c	-94	-1126
candidate_401	2954441	2954526	+	A	85	320.756	0	1	0	0.81	0.00977254	1	AS		Rv2627c	-307	-1019
candidate_402	2955487	2955614	+	A	127	492.156	0.138043	0	0	0.662	0.000362843	0.392233	Within 5'/3' UTRs	3', Rv2628		67	153
candidate_403	2955652	2955697	+	A	45	91.7391	0.138043	1	0	0.122	1.75361e-06	0.00203243	Within 5'/3' UTRs	5', Rv2629		232	70
candidate_404	2955729	2955767	+	A	38	124.308	0.134503	0	0	0.575	0.00135263	1	Within 5'/3' UTRs	5', Rv2629		309	0
candidate_405	2978987	2979022	+	A	35	1619.22	0	1	0	0.013	0.370624	1	AS		Rv2656c	-65	-362
candidate_406	2979204	2979244	+	A	40	98.4634	0	0	0	0.07	0	0	AS		Rv2657c	-105	-195
candidate_407	2980915	2981079	+	A	164	146.764	0.0208532	1	0	0.031	0.00187869	1	AS to 5'/3' UTRs		3', Rv2660c	-275	-116
candidate_408	2982565	2982621	+	A	56	139.737	0.0903102	1	1	0.48	1.29566e-08	1.56645e-05	Within 5'/3' UTRs	5', Rv2665		214	78
candidate_409	2992546	2992581	+	A	35	140.472	0	0	0	0.676	0.967467	1	AS		Rv2676c	-82	-648
candidate_410	3009101	3009152	+	A	51	147.192	0	1	0	0.136	0.507196	1	AS		Rv2690c	-108	-1916
candidate_411	3011808	3011839	+	A	31	92.0312	0.483849	1	0	0.13	0.999671	1	AS to 5'/3' UTRs	5', Rv2695	5', Rv2694c	41	77
candidate_412	3017733	3017787	+	A	54	134.109	2.72011	1	0	0.953	1.66489e-12	2.11608e-09	Within 5'/3' UTRs	3', Rv2702; 5', Rv2703		78	48
candidate_413	3020299	3020346	+	A	47	542.562	0	0	0	0.871	0	0	AS		Rv2706c	-158	-146
candidate_414	3042378	3042409	+	A	31	137.781	0	1	0	0.277	0.997497	1	AS		Rv2729c	-97	-839
candidate_415	3061412	3061584	+	A	172	424.295	0	1	0	0.535	0.00153019	1	AS		Rv2748c	-1094	-1729
candidate_416	3073308	3073344	+	A	36	194.216	0	1	0	0.963	0.906368	1	AS		Rv2763c	-301	-214
candidate_417	3081694	3081748	+	A	54	79.3091	0	0	0	0.88	1.48933e-10	1.84379e-07	AS		Rv2773c	-647	-144
candidate_418	3082286	3082344	+	A	58	297	0	1	0	0.484	0.14623	1	AS to 5'/3' UTRs		3', Rv2774c; 5', Rv2773c	-55	-740
candidate_419	3102219	3102273	+	A	54	221.291	0.304257	0	0	0.715	0.615441	1	AS to 5'/3' UTRs		5', Rv2792c	57	91
candidate_420	3123610	3123837	+	A	227	4836.48	0.00908176	0	0	0.416	0.0011978	1	AS to 5'/3' UTRs		3', Rv2816c	-356	-212
candidate_421	3126351	3126382	+	A	31	85.0625	0	0	0	0.975	0.997936	1	AS		Rv2819c	-1016	-142
candidate_422	3145037	3145106	+	A	69	125.871	0	1	0	0.107	0.969172	1	AS		Rv2838c	-134	-486
candidate_423	3145176	3145223	+	A	47	161.458	0	0	0	0.669	0.329216	1	AS		Rv2839c	-2697	-52
candidate_424	3158196	3158227	+	A	31	98.4688	0	0	0	0.645	0.845213	1	AS		Rv2850c	-1858	-62
candidate_425	3180083	3180116	+	A	33	158.735	0	0	0	0.612	0.966618	1	AS		Rv2868c	-448	-748
candidate_426	3199156	3199239	+	A	83	202.143	0	1	0	0.046	0.13744	1	AS		Rv2890c	-826	-120
candidate_427	3210762	3210792	+	A	30	351.581	0	0	0	0.009	0.948815	1	AS		Rv2900c	-983	-1386
candidate_428	3214034	3214157	+	A	123	672.161	0	1	0	0.861	0.998204	1	AS		Rv2904c	-219	-245
candidate_429	3217476	3217515	+	A	39	160.95	0	0	0	0.203	0.984306	1	AS		Rv2909c	-167	-360
candidate_430	3237775	3237807	+	A	32	137.091	0	1	0	0.588	0.999978	1	AS to 5'/3' UTRs		3', Rv2922A; 5', Rv2922c	-31	-3618
candidate_431	3240331	3240434	+	A	103	236.077	0	1	0	0.889	0.98512	1	AS		Rv2925c	-220	-605
candidate_432	3243367	3243516	+	A	149	384.28	0.138043	1	1	0.719	0	0	Intergenic			86	181
candidate_433	3281621	3281692	+	A	71	257.028	0	0	0	0.978	4.98587e-05	0.0558916	AS		Rv2940c	-1094	-5312
candidate_434	3282368	3282408	+	A	40	137.561	0	0	1	0.82	0.974288	1	AS		Rv2940c	-347	-6028
candidate_435	3282734	3282836	+	A	102	269.718	0.462681	1	0	0.742	0.951794	1	AS to 5'/3' UTRs		5', Rv2940c	19	499
candidate_436	3298811	3298852	+	A	41	632.667	0	1	0	0.857	0.89507	1	AS		Rv2948c	-1143	-1015
candidate_437	3300275	3300445	+	A	170	256.971	0	1	0	0.946	0.998354	1	AS		Rv2949c	-295	-474
candidate_438	3300486	3300577	+	A	91	226.783	0.00662093	0	0	0.377	0.999997	1	AS to 5'/3' UTRs		3', Rv2950c; 5', Rv2949c	-84	-606
candidate_439	3300614	3300660	+	A	46	159.787	0	1	0	0.872	0.845565	1	AS		Rv2950c	-1730	-64
candidate_440	3300706	3300760	+	A	54	180.564	0	0	1	0.329	0.619123	1	AS		Rv2950c	-1638	-164
candidate_441	3301815	3301865	+	A	50	76.7451	0	0	1	0.502	0.957518	1	AS		Rv2950c	-529	-1269
candidate_442	3302650	3302694	+	A	44	229.111	0.101521	0	1	0.449	0.998566	1	Intergenic			306	409
candidate_443	3303756	3303873	+	A	117	167.195	0	1	0	0.8	0.996771	1	AS		Rv2951c	-492	-770
candidate_444	3312756	3312888	+	A	132	394.594	0.0508579	1	0	0.157	0.999972	1	AS to 5'/3' UTRs		5', Rv2959c	-82	-787
candidate_445	3325716	3325806	+	A	90	217.637	0.138043	0	0	0.847	1.0757e-05	0.0121984	AS to 5'/3' UTRs		5', Rv2970c	13	128
candidate_446	3331947	3331978	+	A	31	247.219	0.473998	0	0	0.639	0.998539	1	Intergenic			335	93
candidate_447	3348693	3348749	+	A	56	454.825	0.0435925	1	0	0.691	0.997099	1	AS to 5'/3' UTRs		5', Rvnt36	-37	-90
candidate_448	3353825	3353861	+	A	36	84.8649	0	0	0	0.964	0.0208374	1	AS		Rv2996c	-1244	-378
candidate_449	3356739	3356769	+	A	30	111.29	0.0859683	0	0	0.791	0.906889	1	Within 5'/3' UTRs	5', Rv2998		198	46
candidate_450	3359418	3359463	+	A	45	496.304	0.0949067	1	0	0.131	0.059083	1	Intergenic			147	122
candidate_451	3363055	3363141	+	A	86	95.8391	2.25596	0	0	0.357	0.0156906	1	AS to 5'/3' UTRs		5', Rv3003c	69	207
candidate_452	3364422	3364459	+	A	37	167.684	0	0	0	0.115	0.969247	1	AS		Rv3005c	-110	-766
candidate_453	3368476	3368529	+	A	53	231.833	0	1	0	0.902	6.70393e-10	8.22572e-07	AS		Rv3009c	-317	-1265
candidate_454	3384599	3384682	+	A	83	168.393	0	1	0	0.439	0.116206	1	AS		Rv3025c	-467	-797
candidate_455	3388907	3388937	+	A	30	132.419	2.60786	0	0	0.223	0.892265	1	AS to 5'/3' UTRs		5', Rv3029c	37	164
candidate_456	3404862	3404898	+	A	36	145.162	0	0	0	0.974	0.904583	1	AS		Rv3043c	-59	-1698
candidate_457	3409373	3409423	+	A	50	545.882	0.230519	1	0	0.295	0.998647	1	AS to 5'/3' UTRs		5', Rv3048c	-5	-1019
candidate_458	3410253	3410289	+	A	36	269.405	0	1	0	0.22	0.546284	1	AS		Rv3049c	-830	-780
candidate_459	3412628	3412660	+	A	32	121.03	0	1	0	0.997	0.997283	1	AS		Rv3051c	-1538	-575
candidate_460	3413167	3413199	+	A	32	359.212	0	0	0	0.655	0.998611	1	AS		Rv3051c	-999	-1114
candidate_461	3413977	3414018	+	A	41	80.9524	0	0	0	0.551	0.995624	1	AS		Rv3051c	-189	-1933
candidate_462	3414369	3414424	+	A	55	525.446	0	1	0	0.049	0.127011	1	AS		Rv3052c	-315	-192
candidate_463	3414929	3415091	+	A	162	1067.06	0.0810626	1	0	0.42	0.537236	1	AS to 5'/3' UTRs		5', Rv3053c	-29	-372
candidate_464	3415137	3415184	+	A	47	1115.1	1.78461	0	0	0.278	0.901769	1	Intergenic			179	251
candidate_465	3415249	3415306	+	A	57	386.517	1.67313	1	0	0.922	0.800101	1	Intergenic			291	129
candidate_466	3468004	3468118	+	A	114	94.4174	0	0	0	0.463	0.999775	1	AS		Rvns02	-415	-305
candidate_467	3468184	3468276	+	A	92	235.462	0	0	0	0.134	0.764525	1	AS		Rvns02	-235	-463
candidate_468	3490375	3490405	+	A	30	80.9032	0.129137	0	0	0.818	0.986247	1	AS to 5'/3' UTRs	3', Rv3124	3', Rv3125c	0	71
candidate_469	3493181	3493288	+	A	107	153.537	0	0	0	0.946	8.32112e-14	1.0676e-10	AS	3', Rv3127	3', Rv3128c	-1000	-120
candidate_470	3495616	3495675	+	A	59	536.133	0	1	0	0.263	4.82627e-07	0.000567086	AS		Rv3130c	-750	-700
candidate_471	3496515	3496551	+	A	36	137.514	0.0997642	0	1	0.562	0.0276127	1	AS		Rv3131	149	0
candidate_472	3497549	3497744	+	A	195	338.005	0	0	0	0.61	0.603447	1	AS	3', Rv3131	3', Rv3132c	-1716	-215
candidate_473	3497835	3497870	+	A	35	228.056	0	0	0	0.477	0.993182	1	AS		Rv3132c	-1430	-341
candidate_474	3497939	3498024	+	A	85	116.988	0	1	0	0.502	0.418635	1	AS		Rv3132c	-1326	-495
candidate_475	3499078	3499113	+	A	35	265.639	0	1	0	0.092	0.996983	1	AS		Rv3132c	-187	-1584
candidate_476	3499173	3499205	+	A	32	148.091	0	0	1	0.581	0.0123817	1	AS		Rv3132c	-92	-1676
candidate_477	3499287	3499324	+	A	37	123.947	0	0	0	0.237	0.987153	1	AS		Rv3133c	-628	-62
candidate_478	3499843	3499929	+	A	86	84.7471	0.0206271	0	1	0.052	0.512021	1	AS to 5'/3' UTRs		3', Rv3134c; 5', Rv3133c	-72	-667
candidate_479	3499971	3500052	+	A	81	620.732	0	1	0	0.093	0.99654	1	AS		Rv3134c	-778	-109
candidate_480	3500166	3500197	+	A	31	116.219	0	0	1	0.912	0.96013	1	AS		Rv3134c	-583	-254
candidate_481	3501230	3501268	+	A	38	177.769	0.0885269	0	0	0.977	0	0	Within 5'/3' UTRs	5', Rv3185		481	66
candidate_482	3501732	3501794	+	A	62	274.349	0.131469	0	0	0.16	6.88335e-08	8.21872e-05	Within 5'/3' UTRs	3', Rv3135; 5', Rv3136		0	0
candidate_483	3502987	3503134	+	A	147	114.372	0.148958	0	0	0.203	0.581112	1	Within 5'/3' UTRs	3', Rv3136		51	259
candidate_484	3503221	3503279	+	A	58	370.746	0.0963003	0	0	0.877	0.943473	1	Intergenic			285	114
candidate_485	3505283	3505329	+	A	46	189.404	1.3154	0	0	0.001	0.999907	1	Within 5'/3' UTRs	3', Rv3138; 5', Rv3139		0	34
candidate_486	3510257	3510293	+	A	36	142.514	0	1	0	0.173	0.973914	1	AS		Rv3144c	-1060	-205
candidate_487	3556868	3557018	+	A	150	313.775	0.0949067	1	0	0.579	0.204468	1	Intergenic			181	293
candidate_488	3557057	3557335	+	A	278	557.251	0.204306	0	0	0.954	1.6408e-10	2.02803e-07	AS to 5'/3' UTRs		3', Rv3191c	-1288	-24
candidate_489	3561662	3561715	+	A	53	149.778	0	1	0	0.411	0.0651862	1	AS		Rv3193c	-1510	-1521
candidate_490	3583543	3583763	+	A	220	353.172	0.0324807	1	0	0.513	0.0218379	1	AS to 5'/3' UTRs		3', Rv3207c; 5', Rv3206c	-167	-1231
candidate_491	3584009	3584039	+	A	30	66.5161	0	0	0	0.801	1	1	AS		Rv3207c	-649	-238
candidate_492	3584312	3584420	+	A	108	94.3761	0	1	0	0.701	0.00860727	1	AS		Rv3207c	-346	-619
candidate_493	3585839	3585870	+	A	31	75.2188	0	0	0	0.044	0.999365	1	AS		Rv3208A	-110	-193
candidate_494	3587738	3587798	+	A	60	136.41	0.376011	0	0	0.712	5.43965e-12	6.87028e-09	Within 5'/3' UTRs	5', Rv3211		199	0
candidate_495	3590645	3590679	+	A	34	137.971	1.43002	1	0	0.001	0.837681	1	AS to 5'/3' UTRs	3', Rv3212	3', Rv3213c	28	13
candidate_496	3595502	3595638	+	A	136	228.285	2.05463	1	0	0.596	0.000128821	0.141574	Within 5'/3' UTRs	3', Rv3218; 5', Rv3219		69	75
candidate_497	3595977	3596017	+	A	40	166.829	0.759615	0	1	0.001	0.999987	1	AS to 5'/3' UTRs	3', Rv3219	3', Rv3220c	10	12
candidate_498	3597808	3598107	+	A	299	625.467	1.03563	1	0	0.203	0	0	AS to 5'/3' UTRs		3', Rv3221A; 5', Rv3221c	-548	-56
candidate_499	3599337	3599399	+	A	62	235.429	0	1	0	0.758	0.32186	1	AS		Rv3223c	-214	-498
candidate_500	3611149	3611206	+	A	57	249.241	0.49263	1	0	0.431	0.00107761	1	AS to 5'/3' UTRs		5', Rv3234c	-40	-832
candidate_501	3619942	3619972	+	A	30	112.774	0	0	0	0.974	0.98691	1	AS		Rv3240c	-589	-2290
candidate_502	3621093	3621125	+	A	32	125.909	0	1	0	0.435	0.983281	1	AS		Rv3241c	-161	-515
candidate_503	3621270	3621322	+	A	52	3063.09	2.45089	1	0	0.431	0.00386199	1	AS to 5'/3' UTRs		5', Rv3241c	16	248
candidate_504	3621358	3621470	+	A	112	427.867	1.2322	0	0	0.566	0.13081	1	Intergenic			104	100
candidate_505	3640300	3640377	+	A	77	190.487	4.85881	1	0	0.344	0.69622	1	Intergenic			159	166
candidate_506	3650185	3650234	+	A	49	553	0.0994905	1	0	0.579	0	0	Within 5'/3' UTRs	3', Rv3268; 5', Rv3269		76	0
candidate_507	3671880	3671928	+	A	48	134.878	0	1	0	0.84	0.722405	1	AS		Rv3291c	-417	-83
candidate_508	3671967	3671998	+	A	31	74.25	0	0	0	0.583	0.999491	1	AS		Rv3291c	-330	-153
candidate_509	3672059	3672176	+	A	117	187.534	0	1	0	0.859	0.425411	1	AS		Rv3291c	-238	-331
candidate_510	3709656	3709699	+	A	43	150.318	0	0	0	0.828	0.99737	1	AS		Rv3323c	-58	-650
candidate_511	3730009	3730047	+	A	38	209.872	0	1	0	0.108	0.971173	1	AS		Rv3343c	-6926	-683
candidate_512	3824431	3824520	+	A	89	397.056	0	1	0	0.274	0.831679	1	AS		Rv3404c	-153	-640
candidate_513	3827172	3827244	+	A	72	105.205	0	0	0	0.29	0.000139235	0.15274	AS		Rv3409c	-1555	-253
candidate_514	3827406	3827522	+	A	116	110.513	0	0	1	0.146	0.761214	1	AS		Rv3409c	-1321	-531
candidate_515	3827685	3827727	+	A	42	100.907	0	0	0	0.035	0.483448	1	AS		Rv3409c	-1042	-736
candidate_516	3827803	3827881	+	A	78	427.329	0	0	0	0.457	0.0146217	1	AS		Rv3409c	-924	-890
candidate_517	3829895	3829938	+	A	43	121.636	0	1	0	0.303	8.57567e-07	0.00100164	AS to 5'/3' UTRs		3', Rv3411c; 5' Rv3410c	-1624	-1155
candidate_518	3833581	3833611	+	A	30	92.7419	0	0	0	0.614	0.997022	1	AS		Rv3414c	-95	-573
candidate_519	3855947	3855983	+	A	36	81.973	0	0	0	0.858	0.789474	1	AS		Rv3436c	-942	-968
candidate_520	3877433	3877672	+	A	239	481.054	0.0172554	1	1	0.921	2.28639e-08	2.75053e-05	AS to 5'/3' UTRs		3', Rv3457c; 5', Rv3456c	-1074	-208
candidate_521	3878670	3878794	+	A	124	234.664	0	1	0	0.841	6.39166e-07	0.000749103	AS		Rv3458c	-594	-135
candidate_522	3878845	3878890	+	A	45	90.1957	0	0	0	0.123	0.809938	1	AS		Rv3458c	-419	-231
candidate_523	3880506	3880547	+	A	41	447.095	0	0	0	0.026	0.992882	1	AS		Rv3462c	-147	-115
candidate_524	3880634	3880768	+	A	134	197.459	0.382209	0	0	0.245	0.64063	1	AS to 5'/3' UTRs		5', Rv3462c	-19	-336
candidate_525	3892483	3892527	+	A	44	84.4667	0	0	0	0.579	0.603818	1	AS		Rv3476c	-1237	-156
candidate_526	3893960	3894002	+	A	42	104.163	0.101521	1	0	0.246	5.23074e-11	6.53843e-08	Intergenic			240	91
candidate_527	3894034	3894067	+	A	33	116	0.101521	0	0	0.598	0.998131	1	Within 5'/3' UTRs	5', Rv3477		314	26
candidate_528	3902793	3902884	+	A	91	336.511	0.300659	0	0	0.983	0.964818	1	AS to 5'/3' UTRs		5', Rv3483c	-19	-734
candidate_529	3905697	3905732	+	A	35	160.056	0.136014	1	0	0.228	0.973132	1	Within 5'/3' UTRs	5', Rv3486		131	40
candidate_530	3913616	3913676	+	A	60	190.311	0	1	0	0.723	0.991267	1	AS		Rv3495c	-918	-296
candidate_531	3920889	3920947	+	A	58	296.458	0.138043	0	0	0.872	0.381505	1	AS to 5'/3' UTRs		5', Rv3501c	28	140
candidate_532	3937141	3937171	+	A	30	197.516	0	0	0	0.752	0.970303	1	AS		Rv3509c	-1283	-294
candidate_533	3957485	3957520	+	A	35	284.417	1.36225	0	0	0.791	0.90706	1	Within 5'/3' UTRs	5', Rv3521		117	1
candidate_534	3968149	3968180	+	A	31	612.312	0	1	0	0.87	0.998388	1	AS		Rv3531c	-795	-363
candidate_535	3985389	3985443	+	A	54	377.2	0	1	0	0.721	0.221797	1	AS		Rv3545c	-56	-1299
candidate_536	4009715	4009747	+	A	32	498.788	0	0	0	0.895	0.969171	1	AS		Rv3568c	-484	-450
candidate_537	4009835	4009865	+	A	30	155.032	0	1	0	0.296	0.999875	1	AS		Rv3568c	-364	-568
candidate_538	4012261	4012299	+	A	38	177.974	0.203184	0	0	0.938	0.951904	1	AS to 5'/3' UTRs		5', Rv3570c	-9	-1213
candidate_539	4016288	4016330	+	A	42	135.837	2.4782	0	0	0.909	4.97181e-07	0.00058369	AS to 5'/3' UTRs		5', Rv3573c	76	154
candidate_540	4025441	4025570	+	A	129	1191.41	0.427932	1	0	0.862	1.01635e-06	0.00118608	AS to 5'/3' UTRs		5', Rv3583c	-103	-514
candidate_541	4030458	4030493	+	A	35	161.278	0	1	0	0.663	0.99937	1	AS to 5'/3' UTRs	5', Rv3589	5', Rv3588c	-36	-622
candidate_542	4040633	4040673	+	A	40	100.537	0	0	0	0.01	0.991598	1	AS		Rv3596c	-71	-2515
candidate_543	4041229	4041369	+	A	140	315.56	0.646024	0	0	0.386	0.998326	1	AS to 5'/3' UTRs		3', Rv3598c; 5', Rv3597c	-90	-388
candidate_544	4041979	4042014	+	A	35	98.0278	0	1	0	0.915	0.968142	1	AS		Rv3598c	-961	-591
candidate_545	4042079	4042164	+	A	85	103.07	0	1	1	0.093	0.979758	1	AS		Rv3598c	-861	-741
candidate_546	4048580	4048617	+	A	37	537.763	0	1	0	0.803	0.713001	1	AS		Rv3606c	-167	-436
candidate_547	4048662	4048747	+	A	85	233.802	0	0	1	0.284	0.80064	1	AS		Rv3606c, Rv3607c	-483	-566
candidate_548	4052688	4052824	+	A	136	385.088	0	1	0	0.944	0.989896	1	AS		Rv3610c	-195	-2223
candidate_549	4052897	4052936	+	A	39	156.75	1.59063	1	0	0.879	0.848909	1	AS to 5'/3' UTRs	5', Rv3611	5', Rv3610c	14	14
candidate_550	4054963	4055014	+	A	51	123	0	1	0	0.697	0.000368337	0.397803	AS		Rv3615c	-160	-202
candidate_551	4055874	4055933	+	A	59	112.917	0	0	0	0.547	0.000543356	0.582478	AS		Rv3616c	-501	-736
candidate_552	4056307	4056445	+	A	138	242.784	0.0685249	1	0	0.774	0.567567	1	AS to 5'/3' UTRs		5', Rv3616c	-68	-1248
candidate_553	4063579	4063620	+	A	41	168.238	0	0	0	0.027	0.00570709	1	AS		Rv3624c	-325	-366
candidate_554	4071679	4071791	+	A	112	355.08	0.136821	1	0	0.834	0	0	Within 5'/3' UTRs	5', Rv3633		99	0
candidate_555	4073132	4073162	+	A	30	137.419	0	0	0	0.281	0.758933	1	AS		Rv3634c	-479	-495
candidate_556	4079742	4079811	+	A	69	479.3	0.103465	0	0	0.001	0	0	AS to 5'/3' UTRs		5', Rv3640c	-7	-1291
candidate_557	4081405	4081439	+	A	34	120.714	0.00394408	0	0	0.682	1	1	AS to 5'/3' UTRs	3', Rv3643	5', Rvnt39	-32	-74
candidate_558	4085189	4085219	+	A	30	100.742	0	1	0	0.204	0.762053	1	AS		Rv3646c	-2068	-766
candidate_559	4085340	4085464	+	A	124	853.552	0	1	0	0.645	0.095685	1	AS		Rv3646c	-1917	-1011
candidate_560	4088650	4088710	+	A	60	1691.13	6.09415	1	0	0.125	0.869052	1	Within 5'/3' UTRs	5', Rv3649		119	71
candidate_561	4100684	4100816	+	A	132	167.038	2.37434	0	1	0.804	0	0	Intergenic			174	449
candidate_562	4100900	4100977	+	A	77	322.859	0.438784	0	0	0.025	0	0	Intergenic			390	288
candidate_563	4105658	4105756	+	A	98	494.394	0	1	0	0.394	0.422912	1	AS		Rv3665c	-1426	-297
candidate_564	4110458	4110503	+	A	45	184.913	0.0630195	0	0	0.842	0.0865232	1	AS to 5'/3' UTRs		5', Rv3668c	-23	-720
candidate_565	4118485	4118545	+	A	60	450.328	0	1	0	0.059	0.917485	1	AS to 5'/3' UTRs		3', Rv3678A; 5', Rv3678c	-206	-486
candidate_566	4118585	4118672	+	A	87	178.784	0	0	0	0.249	0.0904533	1	AS		Rv3678A	-106	-142
candidate_567	4140208	4140238	+	A	30	120.548	0	1	0	0.893	0.850255	1	AS		Rv3697c	-34	-433
candidate_568	4152889	4152922	+	A	33	491.265	0	0	0	0.829	0.620944	1	AS		Rv3709c	-594	-704
candidate_569	4153718	4153769	+	A	51	159.942	0.791361	0	0	0.875	1.07942e-07	0.000128343	Within 5'/3' UTRs	5', Rv3710		235	91
candidate_570	4160939	4160976	+	A	37	250.289	2.1239	1	0	0.038	1.57195e-09	1.9225e-06	AS to 5'/3' UTRs	5', Rv3717	5', Rv3716c	26	72
candidate_571	4171143	4171330	+	A	187	322.537	0.111513	0	0	0.145	0.687971	1	Within 5'/3' UTRs	3', Rv3725		0	91
candidate_572	4189855	4189898	+	A	43	231.409	0	0	0	0.364	0.0508784	1	AS		Rv3738c	-377	-613
candidate_573	4198458	4198519	+	A	61	221.71	0	1	0	0.752	0.710004	1	AS		Rv3750c	-139	-314
candidate_574	4201370	4201407	+	A	37	105	0	0	0	0.637	0.950537	1	AS		Rv3755c	-518	-118
candidate_575	4201681	4201738	+	A	57	680.862	0	1	0	0.846	0.957259	1	AS		Rv3755c	-207	-449
candidate_576	4213369	4213408	+	A	39	441.525	0	1	0	0.917	0.809571	1	AS		Rv3767c	-571	-412
candidate_577	4263018	4263054	+	A	36	242.892	0	0	0	0.219	0.786883	1	AS		Rv3801c	-48	-1901
candidate_578	4264694	4264732	+	A	38	172.564	0	0	0	0.647	0.113894	1	AS		Rv3803c	-768	-169
candidate_579	4266704	4266737	+	A	33	251.618	0.942321	0	0	0.35	0.997655	1	AS to 5'/3' UTRs		5', Rv3804c	46	216
candidate_580	4272517	4272644	+	A	127	325.008	0	1	0	0.993	0	0	AS		Rv3809c	-958	-368
candidate_581	4281335	4281452	+	A	117	437.551	0	0	0	0.312	0.000163309	0.178497	AS		Rv3816c	-236	-660
candidate_582	4281488	4281543	+	A	55	139	0	1	0	0.933	0.66765	1	AS		Rv3816c	-83	-751
candidate_583	4285597	4285654	+	A	57	244.017	0	0	0	0.382	0.124147	1	AS		Rv3820c	-228	-1235
candidate_584	4291362	4291392	+	A	30	72.7742	0	0	0	0.772	0.922969	1	AS		Rv3823c	-167	-3132
candidate_585	4291619	4291650	+	A	31	120.062	0.0862768	0	1	0.314	0.915493	1	AS to 5'/3' UTRs		3', Rv3824c	-1555	-11
candidate_586	4314799	4315001	+	A	202	596.488	0	0	0	0.002	0	0	AS	3', Rv3841	Rv3842c	-763	-263
candidate_587	4315515	4315592	+	A	77	116.654	0	1	1	0.624	0.0127454	1	AS to 5'/3' UTRs		3', Rv3843c; 5', Rv3842c	-1081	-854
candidate_588	4316133	4316213	+	A	80	133.346	0	0	0	0.107	0.727648	1	AS		Rv3843c	-463	-645
candidate_589	4320595	4320644	+	A	49	222.44	0.499758	0	1	0.151	0.0472951	1	Within 5'/3' UTRs	5', Rv3846		955	60
candidate_590	4332298	4332392	+	A	94	131.063	0	1	0	0.089	0.860434	1	AS		Rv3859c	-3783	-894
candidate_591	4332796	4332833	+	A	37	140	0	0	1	0.06	0.986	1	AS		Rv3859c	-3285	-1335
candidate_592	4336195	4336311	+	A	116	1878.05	1.82788	1	0	0.132	0.0176725	1	Intergenic			114	466
candidate_593	4341478	4341566	+	A	88	337.798	0.348681	0	0	0.762	0.00135213	1	Within 5'/3' UTRs	3', Rv3864; 5', Rv3865		0	0
candidate_594	4352579	4352609	+	A	30	196.258	0.0882246	0	1	0.043	0.688189	1	Within 5'/3' UTRs	3', Rv2874; 5', Rv3875		3	0
candidate_595	4352898	4352979	+	A	81	602.744	0.246945	0	1	0.001	0	0	Within 5'/3' UTRs	3', Rv3875; 5', Rv3876		2	31
candidate_596	4364741	4364844	+	A	103	658.865	0.105916	1	0	0.935	0.714894	1	AS to 5'/3' UTRs		5', Rv3883c	-16	-1427
candidate_597	4383927	4384037	+	A	110	408.072	0.0625844	1	0	0.707	0.0313679	1	AS to 5'/3' UTRs		5', Rv3898c	-58	-384
candidate_598	4403090	4403125	+	A	35	84.5556	2.0025	1	0	0.455	0.999988	1	Within 5'/3' UTRs	3', Rv3914; 5', Rv3915		8	67
candidate_599	4409497	4409539	+	A	42	173.558	0	0	0	0.952	0.0785235	1	AS to 5'/3' UTRs		Rv3921c	-572	-570
candidate_600	4410395	4410425	+	A	30	109.452	0	0	0	1	0.994294	1	AS to 5'/3' UTRs		Rv3922c, Rv3923c	-367	-372
candidate_601	4411270	4411355	+	A	85	157.198	0.0435244	1	0	0.405	0.751187	1	Intergenic			341	-4411355
candidate_602	58147	58191	+	B	44	201.978	4.79181	1	0	0.783			Within 5'/3' UTRs	5', Rv0053		174	1
candidate_603	79143	79173	+	B	30	129.516	0.94984	0	0	0.786			Intergenic			247	313
candidate_604	528426	528462	+	B	36	68.6486	5.76654	1	0	0.158			Intergenic			112	146
candidate_605	528508	528541	+	B	33	77.3824	2.85009	0	0	0.863			Within 5'/3' UTRs	5', Rv0440		194	67
candidate_606	528567	528607	+	B	40	61.9024	2.67545	0	0	0.096			Within 5'/3' UTRs	5', Rv0440		253	1
candidate_607	559826	559870	+	B	44	104.044	0.94984	1	0	0.76			Within 5'/3' UTRs	3', Rv0468; 5', Rv0469		71	18
candidate_608	591070	591110	+	B	40	223.22	4.64386	1	0	0.937			Within 5'/3' UTRs	3', Rv0500; 5', Rv0500A		100	1
candidate_609	733363	733394	+	B	31	76.6875	2.39888	1	0	0.815			Within 5'/3' UTRs	3', Rv0637		38	130
candidate_610	733631	733672	+	B	41	43.9048	0.94984	0	0	0.249			Within 5'/3' UTRs	3', Rvnt08; 5', Rv0638		35	65
candidate_611	736230	736279	+	B	49	310.6	2.50407	0	1	0.005			AS to 5'/3' UTRs	4', Rv0641	3', Rv0642c	6	19
candidate_612	759660	759742	+	B	82	102.892	1.59511	1	0	0.627			Within 5'/3' UTRs	5', Rv0667		351	65
candidate_613	781376	781424	+	B	48	58.1224	1.5829	1	0	0.008			Within 5'/3' UTRs	3', Rv0681		65	136
candidate_614	784764	784816	+	B	52	221.283	2.41133	1	0	0.025			Within 5'/3' UTRs	5', Rv0685		174	5
candidate_615	800342	800377	+	B	35	30.2222	5.30185	0	0	0.457			Intergenic			492	110
candidate_616	965544	965595	+	B	51	274.077	3.86531	1	0	0.844			AS to 5'/3' UTRs		5', Rv0867c	9	388
candidate_617	965727	965758	+	B	31	47.1562	0.94984	0	0	0.594			Intergenic			192	225
candidate_618	967821	967853	+	B	32	97.0909	1.97702	1	0	0.002			Within 5'/3' UTRs	5', Rv0871		88	45
candidate_619	1127911	1127951	+	B	40	99.1707	2.6434	0	0	0.417			Within 5'/3' UTRs	3', Rv1008		28	140
candidate_620	1200524	1200554	+	B	30	44.9032	1.30055	1	0	0.014			Intergenic			154	213
candidate_621	1261489	1261526	+	B	37	86.5	2.91061	0	0	0.294			Intergenic			143	396
candidate_622	1261639	1261674	+	B	35	305.556	2.01973	0	0	0.52			Intergenic			293	248
candidate_623	1301262	1301306	+	B	44	98.1111	4.17193	1	0	0.801			Within 5'/3' UTRs	3', Rv1170; 5', Rv1171		47	1
candidate_624	1306043	1306074	+	B	31	33.5	1.49029	0	0	0.311			Intergenic			42	128
candidate_625	1364356	1364395	+	B	39	124.45	1.77192	1	0	0.565			Within 5'/3' UTRs	5', Rv1221		206	18
candidate_626	1413109	1413139	+	B	30	169.419	0.960122	0	0	0.756			Within 5'/3' UTRs	3', Rv1264		22	121
candidate_627	1453061	1453091	+	B	30	208.355	1.90611	0	0	0.508			Intergenic			114	113
candidate_628	1453112	1453156	+	B	44	51.6444	1.78578	0	0	0.544			Within 5'/3' UTRs	5', Rv1297		165	48
candidate_629	1455410	1455461	+	B	51	240.135	1.69287	0	0	0.001			Within 5'/3' UTRs	3', Rv1298; 5', Rv1299		5	34
candidate_630	1459572	1459610	+	B	38	253.974	2.29968	1	0	0.113			Within 5'/3' UTRs	3', Rv1302		63	156
candidate_631	1473394	1473448	+	B	54	28.7818	1.36428	0	0	0.306			Within 5'/3' UTRs	3', Rvnr01		12	210
candidate_632	1566786	1566816	+	B	30	290.452	0.94984	1	0	0.63			Within 5'/3' UTRs	5', Rv1392		89	9
candidate_633	1655545	1655576	+	B	31	54.625	1.28381	0	0	0.667			AS to 5'/3' UTRs		3', Rv1468c; 5', Rv1467c	43	33
candidate_634	1735542	1735577	+	B	35	39.5833	3.52136	0	0	0.408			Intergenic			131	399
candidate_635	1735645	1735677	+	B	32	64.4242	2.19557	0	0	0.337			Intergenic			234	299
candidate_636	1735777	1735818	+	B	41	354.214	1.77192	0	0	0.085			Intergenic			366	158
candidate_637	1872575	1872610	+	B	35	58.3611	2.21186	0	1	0.373			Within 5'/3' UTRs	3', Rv1658; 5', Rv1659		16	29
candidate_638	2466979	2467012	+	B	33	2738.85	1.18866	0	0	0.011			AS to 5'/3' UTRs	3', Rv2201	3', Rv2202c	24	41
candidate_639	2529890	2529959	+	B	69	42.6286	2.23045	0	0	0.697			AS to 5'/3' UTRs		3', Rv2257c; 5', Rv2256c	16	45
candidate_640	2608531	2608570	+	B	39	69.3	0.94984	1	0	0.2			Intergenic			210	226
candidate_641	2759492	2759566	+	B	74	72.7867	2.45407	0	0	0.981			AS to 5'/3' UTRs		5', Rv2457c	4	213
candidate_642	2763784	2763842	+	B	58	944.492	0.960122	0	0	0.585			AS to 5'/3' UTRs		3', Rv2462c; 5', Rv2461c	10	49
candidate_643	2907783	2907816	+	B	33	48.0588	1.83829	0	0	0.16			AS to 5'/3' UTRs	3', Rv2582	3', Rv2583c	43	10
candidate_644	2969674	2969706	+	B	32	63.4848	1.79607	1	0	0.666			Within 5'/3' UTRs	5', Rvnt32		106	47
candidate_645	2969709	2969744	+	B	35	56.6389	2.38236	1	0	0.075			Within 5'/3' UTRs	5', Rvnt32		141	9
candidate_646	3017788	3017834	+	B	46	52.5532	0.94984	0	0	0.193			Within 5'/3' UTRs	5', Rv2703		133	1
candidate_647	3023454	3023490	+	B	36	59	1.42486	0	0	0.004			Within 5'/3' UTRs	3', Rv2710; 5', Rv2711		22	75
candidate_648	3093790	3093828	+	B	38	77.2051	3.31273	0	0	0.959			AS to 5'/3' UTRs		3', Rv2786c; 5', Rv2785c	42	77
candidate_649	3587687	3587733	+	B	46	67.2979	1.34013	0	0	0.94			Within 5'/3' UTRs	5', Rv3211		148	65
candidate_650	3595639	3595706	+	B	67	67.5	1.36521	0	0	0.258			Within 5'/3' UTRs	5', Rv3219		206	7
candidate_651	3862558	3862588	+	B	30	83.9355	2.31124	0	1	0.001			AS to 5'/3' UTRs		3', Rv3444c	168	36
candidate_652	3880169	3880204	+	B	35	36.6111	1.01004	0	0	0.013			Intergenic			99	82
candidate_653	4041384	4041416	+	B	32	45.3333	2.25973	1	0	1			AS to 5'/3' UTRs		3', Rv3598c	65	7
candidate_654	4100817	4100865	+	B	48	60.1633	2.55491	0	0	0.429			Intergenic			307	400
candidate_655	4116445	4116477	+	B	32	40.7879	0.94984	1	0	0.588			Within 5'/3' UTRs	5', Rv3676		66	1
candidate_656	4121633	4121666	+	B	33	69.9118	1.57849	0	0	0.071			Intergenic			79	250
candidate_657	4153620	4153680	+	B	60	150.164	5.55582	1	0	0.516			Intergenic			137	180
candidate_658	4168205	4168283	+	B	78	145.329	3.75324	0	0	0.96			AS to 5'/3' UTRs	5', Rvnt41	5', Rv3722c	77	62
candidate_659	4209016	4209046	+	B	30	58.9355	0.94984	0	1	0.917			Within 5'/3' UTRs	5', Rv3763		140	1
candidate_660	4263226	4263263	+	B	37	259.289	1.91124	1	0	0.047			Intergenic			160	92
candidate_661	4322176	4322227	+	B	51	155.615	1.69168	1	0	0.269			Intergenic			105	99
candidate_662	4323405	4323435	+	B	30	42.0645	2.40942	0	0	0.136			Within 5'/3' UTRs	5', Rv3849		171	64
candidate_663	1920	1954	+	C	34	50.3143	1.77192	1	0	0.222			Intergenic			396	98
candidate_664	13593	13645	+	C	52	5.69811	3.54575	0	0	0.194			AS to 5'/3' UTRs		3', Rv0011c; 5', Rv0010c	35	69
candidate_665	23794	23824	+	C	30	4.90323	2.20023	0	0	0.477			AS to 5'/3' UTRs		3', Rv0020c; 5', Rv0019c	57	37
candidate_666	58105	58146	+	C	41	15.4762	5.32166	1	0	0.37			Within 5'/3' UTRs	5', Rv0053		132	46
candidate_667	133846	133880	+	C	34	3.54286	2.49003	1	0	0.92			Within 5'/3' UTRs	3', Rv0110; 5', Rv0111		77	70
candidate_668	139759	139792	+	C	33	15.1765	1.77192	0	0	0.004			Intergenic			86	475
candidate_669	154133	154231	+	C	98	1.0303	2.5742	0	0	0.449			Within 5'/3' UTRs	3', Rv0126; 5', Rv0127		4	1
candidate_670	157620	157671	+	C	51	2.40385	1.77192	0	0	0.298			AS to 5'/3' UTRs		5', Rv0129c	20	176
candidate_671	183236	183292	+	C	56	1.91228	2.16697	0	0	0.006			AS to 5'/3' UTRs		5', Rv0154c	38	330
candidate_672	248919	248968	+	C	49	0.48	3.8942	0	0	0.129			AS to 5'/3' UTRs	5', Rv0209	5', Rv0208c	13	70
candidate_673	267767	267811	+	C	44	19.0444	2.58929	0	0	0.521			AS to 5'/3' UTRs		3', Rv0224c; 5', Rv0223c	3	52
candidate_674	272864	272951	+	C	87	0.897727	3.35605	0	0	0.342			AS to 5'/3' UTRs		5', Rv0227c	25	104
candidate_675	292080	292133	+	C	53	231.426	3.44109	1	0	0.399			AS to 5'/3' UTRs	5', Rv0243	5', Rv0242c	51	38
candidate_676	293668	293710	+	C	42	24.5349	1.77192	0	0	0.001			Intergenic			175	88
candidate_677	295696	295726	+	C	30	120.839	2.36517	1	0	0.018			AS to 5'/3' UTRs		5', Rv0244c	63	279
candidate_678	330347	330377	+	C	30	21.129	3.11625	0	0	0.002			AS to 5'/3' UTRs	5', Rv0274	5', Rv0273c	22	45
candidate_679	436805	436836	+	C	31	1.75	2.29568	1	0	0.49			AS to 5'/3' UTRs	5', Rv0358	5', Rv0357c	36	24
candidate_680	462029	462085	+	C	56	5.98246	4.33314	0	0	0.17			AS to 5'/3' UTRs	5', Rv0385	5', Rv0384c	27	50
candidate_681	501056	501142	+	C	86	6.13793	3.92971	1	0	0.919			AS to 5'/3' UTRs	5', Rv0415	5', Rv0414c	38	6
candidate_682	510231	510323	+	C	92	1.77419	5.47973	0	0	0.083			AS to 5'/3' UTRs		5', Rv0423c	6	54
candidate_683	528390	528425	+	C	35	0.861111	3.98832	0	0	0.012			AS to 5'/3' UTRs		5', Rv0439c	76	183
candidate_684	549618	549650	+	C	32	2.24242	1.77192	0	0	0.73			AS to 5'/3' UTRs	5', Rv0458	5', Rv0457c	11	25
candidate_685	557300	557333	+	C	33	0	1.77192	0	0	0.458			Within 5'/3' UTRs	3', Rv0466		48	194
candidate_686	557418	557448	+	C	30	7.83871	1.79607	0	0	0.76			Within 5'/3' UTRs	5', Rv0467		166	79
candidate_687	565686	565731	+	C	45	15.9783	1.78578	0	0	0.286			Within 5'/3' UTRs	5', Rv0475		243	66
candidate_688	573883	573922	+	C	39	12.1	1.77192	0	0	0.179			AS to 5'/3' UTRs	5', Rv0485	5', Rv0484c	82	62
candidate_689	580586	580648	+	C	62	9.28571	2.69058	0	0	0.881			Within 5'/3' UTRs	3', Rv0490		5	161
candidate_690	580656	580725	+	C	69	0.257143	2.64675	0	0	0.571			Within 5'/3' UTRs	3', Rv0490		75	84
candidate_691	580733	580801	+	C	68	1.62319	2.65771	0	0	0.502			Within 5'/3' UTRs	5', Rv0491		152	8
candidate_692	590980	591069	+	C	89	32.5889	4.7949	0	0	0.762			Within 5'/3' UTRs	3', Rv0500; 5', Rv0500A		10	42
candidate_693	595347	595389	+	C	42	1.5814	2.29794	0	0	0.628			AS to 5'/3' UTRs		3', Rv0505c; 5', Rv0504c	45	75
candidate_694	595401	595447	+	C	46	1.38298	2.25244	0	0	0.712			AS to 5'/3' UTRs		3', Rv0505c	99	17
candidate_695	731415	731470	+	C	55	99.3393	2.37237	0	0	0.496			Within 5'/3' UTRs	3', Rv0634A; 5', Rvnt06		51	24
candidate_696	735460	735502	+	C	42	24.5116	3.0364	0	0	0.073			Within 5'/3' UTRs	3', Rv0640; 5', Rv0641		10	15
candidate_697	748058	748153	+	C	95	21.8542	4.79631	1	0	0.729			Intergenic			113	123
candidate_698	755267	755308	+	C	41	1	2.75433	0	0	0.044			AS to 5'/3' UTRs		3', Rv0661c; 5', Rv0660c	42	27
candidate_699	759553	759593	+	C	40	4.2439	4.81832	0	0	0.228			Intergenic			244	214
candidate_700	781335	781375	+	C	40	2.80488	1.77192	0	0	0.078			Within 5'/3' UTRs	3', Rv0681		24	185
candidate_701	787046	787077	+	C	31	4.0625	1.77192	1	0	0.191			Within 5'/3' UTRs	5', Rv0687		100	22
candidate_702	791791	791828	+	C	37	10.3947	2.53292	0	0	0.649			Within 5'/3' UTRs	5', Rv0692		125	3
candidate_703	795472	795518	+	C	46	0.87234	2.56374	0	0	0.11			Within 5'/3' UTRs	3', Rv0695; 5', Rv0696		2	1
candidate_704	800189	800341	+	C	152	35.9739	3.26078	1	0	0.018			Intergenic			339	146
candidate_705	802438	802473	+	C	35	198.306	2.60786	0	0	0.36			Within 5'/3' UTRs	3', Rv0703; 5', Rv0704		3	55
candidate_706	811207	811253	+	C	46	10.9787	1.77192	1	0	0.505			Intergenic			320	120
candidate_707	812899	812967	+	C	68	20.087	2.28075	0	0	0.674			Within 5'/3' UTRs	5', Rv0718		87	9
candidate_708	824694	824762	+	C	68	4.2029	2.26222	1	0	0.583			Within 5'/3' UTRs	5', Rv0732		55	38
candidate_709	863163	863195	+	C	32	0.181818	2.57076	0	0	0.382			Within 5'/3' UTRs	3', Rv0769; 5', Rv0770		5	61
candidate_710	905089	905185	+	C	96	18.9794	4.79868	0	0	0.035			AS to 5'/3' UTRs		3', Rv0811c; 5', Rv0810c	2	49
candidate_711	908020	908065	+	C	45	2.17391	1.84871	0	0	0.165			AS to 5'/3' UTRs		5', Rv0813c	2	116
candidate_712	918756	918819	+	C	63	11.5156	3.84861	0	0	0.941			AS to 5'/3' UTRs		5', Rv0824c	6	93
candidate_713	923933	923998	+	C	65	20.5455	3.4013	1	0	0.64			AS to 5'/3' UTRs	5', Rvnt11	5', Rvnt10	58	1
candidate_714	954968	955006	+	C	38	0	2.19092	1	0	0.209			AS to 5'/3' UTRs	5', Rv0859	5', Rv0858c	48	71
candidate_715	960174	960328	+	C	154	0.270968	2.48921	0	0	0.643			AS to 5'/3' UTRs		3', Rv0862c; 5', Rv0861c	23	14
candidate_716	965677	965721	+	C	44	21.8	3.1864	0	0	0.063			Intergenic			142	262
candidate_717	967854	967889	+	C	35	15.8333	1.88952	1	0	0.918			Within 5'/3' UTRs	5', Rv0871		121	9
candidate_718	981286	981316	+	C	30	467.097	2.04158	0	0	0.752			AS to 5'/3' UTRs		5', Rv0883c	19	108
candidate_719	1057973	1058109	+	C	136	6.43796	4.03031	0	0	0.011			AS to 5'/3' UTRs		5', Rv0948c	10	151
candidate_720	1064054	1064112	+	C	58	34.1525	2.75749	0	0	0.001			AS to 5'/3' UTRs	3', Rv0952	3', Rv0953c	3	2
candidate_721	1112253	1112307	+	C	54	3.90909	3.71719	0	0	0.029			Within 5'/3' UTRs	3', Rv0995; 5', Rv0996		30	77
candidate_722	1131446	1131476	+	C	30	2.90323	2.26683	0	0	0.032			Within 5'/3' UTRs	3', Rv1012		25	149
candidate_723	1131502	1131545	+	C	43	36.8636	2.27115	1	0	0.995			Intergenic			81	80
candidate_724	1179350	1179395	+	C	45	4.43478	2.57198	0	0	0.537			Within 5'/3' UTRs	5', Rv1057		958	1
candidate_725	1187328	1187362	+	C	34	8.91429	2.28144	0	0	0.684			AS to 5'/3' UTRs	5', Rv1065	5', Rv1064c	5	73
candidate_726	1205928	1205968	+	C	40	2.17073	3.38439	0	0	0.428			AS to 5'/3' UTRs		3', Rv1081c	130	16
candidate_727	1222830	1222877	+	C	47	26.9167	2.50381	1	0	0.453			Within 5'/3' UTRs	3', Rv1094		44	120
candidate_728	1236100	1236134	+	C	34	4.4	1.77192	1	0	0.096			AS to 5'/3' UTRs	5', Rv1110	5', Rv1109c	5	51
candidate_729	1261438	1261488	+	C	50	10.7059	3.03197	0	0	0.43			Intergenic			92	434
candidate_730	1261527	1261607	+	C	80	30.3951	2.19039	0	0	0.644			Intergenic			181	315
candidate_731	1271970	1272033	+	C	63	6.0625	2.5051	0	0	0.167			Within 5'/3' UTRs	3', Rv1144		62	390
candidate_732	1272192	1272239	+	C	47	1.5	3.53378	0	0	0.137			Intergenic			284	184
candidate_733	1284910	1284965	+	C	55	1.51786	2.45226	0	0	0.765			Within 5'/3' UTRs	5', Rv1159		48	27
candidate_734	1308881	1308912	+	C	31	10.7812	2.56956	0	0	0.974			Intergenic			89	93
candidate_735	1354176	1354220	+	C	44	12.5556	2.19082	0	0	0.392			Within 5'/3' UTRs	3', Rv1201; 5', Rv1211		40	23
candidate_736	1374262	1374306	+	C	44	7.08889	1.77192	1	0	0.289			AS to 5'/3' UTRs		3', Rv1231c; 5', Rv1230c	65	16
candidate_737	1425329	1425382	+	C	53	5.2963	3.36844	0	0	0.72			AS to 5'/3' UTRs	3', Rv1276c	3', Rv1275	36	56
candidate_738	1451781	1451819	+	C	38	1.30769	2.19525	0	0	0.354			Within 5'/3' UTRs	3', Rv1295		2	178
candidate_739	1451837	1451876	+	C	39	0	2.19525	0	0	0.37			Within 5'/3' UTRs	3', Rv1295		58	121
candidate_740	1451894	1451933	+	C	39	0	2.19525	0	0	0.383			Within 5'/3' UTRs	5', Rv1296		115	64
candidate_741	1451951	1451990	+	C	39	34.85	2.19525	0	0	0.365			Within 5'/3' UTRs	5', Rv1296		172	7
candidate_742	1452964	1453006	+	C	42	8.4186	2.20023	0	0	0.03			Within 5'/3' UTRs	3', Rv1296		17	198
candidate_743	1453157	1453203	+	C	46	10.9787	2.18071	0	0	0.018			Within 5'/3' UTRs	5', Rv1297		210	1
candidate_744	1455049	1455088	+	C	39	18.55	2.85303	0	0	0.724			Within 5'/3' UTRs	3', Rv1297; 5', Rv1298		37	75
candidate_745	1459645	1459717	+	C	72	24.4932	3.15499	0	0	0.734			Within 5'/3' UTRs	5', Rv1303		136	49
candidate_746	1507537	1507572	+	C	35	4.80556	2.54021	0	0	0.23			Within 5'/3' UTRs	3', Rv1340; 5', Rv1341		3	1
candidate_747	1625367	1625417	+	C	50	0.764706	2.5511	0	0	0.626			AS to 5'/3' UTRs		3', Rv1447c; 5', Rv1446c	2	1
candidate_748	1634972	1635011	+	C	39	25.85	2.01679	1	0	0.016			Within 5'/3' UTRs	5', Rv1451		345	18
candidate_749	1644262	1644362	+	C	100	0	2.59561	0	0	0.14			AS to 5'/3' UTRs		3', Rv1459c; 5', Rv1458c	2	1
candidate_750	1666049	1666091	+	C	42	27.7209	2.19525	0	0	0.726			AS to 5'/3' UTRs		5', Rv1475c	3	113
candidate_751	1666831	1666930	+	C	99	20.82	2.63234	0	0	0.297			Within 5'/3' UTRs	3', Rv1476; 5', Rv1477		67	60
candidate_752	1669170	1669230	+	C	60	6.62295	2.33515	0	0	0.32			Within 5'/3' UTRs	3', Rv1478; 5', Rv1479		26	53
candidate_753	1735491	1735541	+	C	50	98.4706	2.76406	0	1	0.722			Intergenic			80	435
candidate_754	1735578	1735644	+	C	66	8.74627	2.70049	0	1	0.672			Intergenic			167	332
candidate_755	1736298	1736458	+	C	160	10.2112	4.77936	1	0	0.623			Within 5'/3' UTRs	5', Rv1536		86	61
candidate_756	1747647	1747693	+	C	46	1.78723	2.94277	0	0	0.662			Within 5'/3' UTRs	3', Rv1546; 5', Rv1547		21	1
candidate_757	1774784	1774814	+	C	30	2.41935	2.60786	1	0	0.387			AS to 5'/3' UTRs		5', Rv1567c	164	46
candidate_758	1799515	1799554	+	C	39	1.3	2.16914	0	0	0.594			AS to 5'/3' UTRs	5', Rv1599	5', Rv1598c	32	29
candidate_759	1836833	1836894	+	C	61	5.30645	3.64236	0	0	0.904			AS to 5'/3' UTRs		5', Rv1632c	3	181
candidate_760	1852139	1852177	+	C	38	10.4359	2.58705	0	0	0.059			Intergenic			104	96
candidate_761	1858653	1858700	+	C	47	12.4167	2.2527	0	0	0.599			Within 5'/3' UTRs	5', Rv1649		116	33
candidate_762	1921474	1921509	+	C	35	10.5	4.13921	1	0	0.262			Within 5'/3' UTRs	3', Rv1696; 5', Rv1697		28	33
candidate_763	1923729	1923764	+	C	35	8.77778	4.223	1	0	0.125			Within 5'/3' UTRs	3', Rv1698; 5', Rv1699		40	65
candidate_764	1944762	1944804	+	C	42	0.534884	2.56046	0	0	0.369			Within 5'/3' UTRs	3', Rv1717; 5', Rv1718		6	5
candidate_765	2029754	2029785	+	C	31	2	2.13765	1	0	0.046			Intergenic			277	119
candidate_766	2047593	2047686	+	C	93	14.0532	2.90274	1	0	0.017			AS to 5'/3' UTRs		3', Rv1805c	244	1
candidate_767	2059469	2059543	+	C	74	0.626667	2.47294	0	0	0.355			Within 5'/3' UTRs	5', Rv1817		509	52
candidate_768	2059546	2059594	+	C	48	0	2.42625	0	0	0.209			Within 5'/3' UTRs	5', Rv1817		586	1
candidate_769	2072559	2072595	+	C	36	21.7027	4.26435	0	0	0.871			Within 5'/3' UTRs	5', Rv1827		203	1
candidate_770	2092160	2092190	+	C	30	7.22581	1.78578	0	0	0.589			AS to 5'/3' UTRs		3', Rv1843c; 5', Rv1842c	75	69
candidate_771	2096609	2096649	+	C	40	6.04878	2.06868	0	0	0.808			AS to 5'/3' UTRs		5', Rv1846c	10	228
candidate_772	2104825	2104860	+	C	35	6.19444	1.78578	0	0	0.264			AS to 5'/3' UTRs		5', Rv1856c	2	125
candidate_773	2104904	2104939	+	C	35	22.8333	2.5364	1	0	0.036			Within 5'/3' UTRs	5', Rv1857		81	46
candidate_774	2107699	2107735	+	C	36	2.24324	2.60786	0	0	0.549			Within 5'/3' UTRs	3', Rv1859; 5', Rv1860		16	1
candidate_775	2125085	2125135	+	C	50	16.4706	2.52591	0	0	0.385			Intergenic			261	205
candidate_776	2307107	2307159	+	C	52	65.7736	2.10882	0	0	0.033			Intergenic			121	134
candidate_777	2378321	2378364	+	C	43	0	1.79607	1	0	0.491			AS to 5'/3' UTRs	5', Rv2119	5', Rv2118c	9	22
candidate_778	2409573	2409675	+	C	102	82.8155	3.32732	0	0	0.125			AS to 5'/3' UTRs		3', Rv2151c; 5', Rv2150c	49	22
candidate_779	2429328	2429419	+	C	91	0.782609	3.74013	0	1	0.001			AS		Rv2165c	59	8
candidate_780	2429885	2429935	+	C	50	6.7451	3.94803	0	0	1			AS to 5'/3' UTRs		5', Rv2168c	27	224
candidate_781	2431972	2432028	+	C	56	35.386	1.77192	0	0	0.979			AS to 5'/3' UTRs		5', Rv2169c	3	207
candidate_782	2446978	2447040	+	C	62	13.8413	2.09591	0	0	0.992			AS to 5'/3' UTRs		3', Rv2185c; 5', Rv2184c	32	26
candidate_783	2453319	2453381	+	C	62	18.381	2.22249	0	0	0.738			AS to 5'/3' UTRs		5', Rv2190c	47	438
candidate_784	2456856	2456900	+	C	44	5.46667	4.76651	1	0	0.597			Within 5'/3' UTRs	5', Rv2193		113	1
candidate_785	2487533	2487594	+	C	61	145.355	1.77192	1	0	0.836			Within 5'/3' UTRs	5', Rv2220		117	21
candidate_786	2500385	2500425	+	C	40	11.0244	2.88011	0	0	0.163			AS to 5'/3' UTRs	3', Rv2226	3', Rvns01	12	20
candidate_787	2500790	2500821	+	C	31	6.25	4.95089	0	1	0.692			AS to 5'/3' UTRs		5', Rvns01	39	110
candidate_788	2516715	2516786	+	C	71	3.375	5.53662	1	0	0.652			Within 5'/3' UTRs	5', Rv2243		167	1
candidate_789	2529960	2529992	+	C	32	11.3636	3.19623	1	0	0.786			AS to 5'/3' UTRs		3', Rv2257c; 5', Rv2256c	86	12
candidate_790	2531899	2532210	+	C	311	0	2.52352	0	0	0.393			AS to 5'/3' UTRs	5', Rv2259	5', Rv2258c	2	35
candidate_791	2641160	2641193	+	C	33	4.73529	1.77192	0	0	0.059			Within 5'/3' UTRs	5', Rv2358		96	53
candidate_792	2644260	2644319	+	C	59	1.23333	2.53866	1	0	0.825			AS to 5'/3' UTRs	5', Rv2363	5', Rv2362c	2	1
candidate_793	2710007	2710040	+	C	33	4.70588	1.77192	0	0	0.789			AS to 5'/3' UTRs	5', Rv2412	5', Rv2411c	42	35
candidate_794	2716324	2716388	+	C	64	0.369231	3.34477	0	0	0.046			AS to 5'/3' UTRs		3', Rv2418c; 5', Rv2417c	10	7
candidate_795	2740485	2740515	+	C	30	5.48387	3.96474	0	0	0.264			Intergenic			124	194
candidate_796	2744986	2745245	+	C	259	9.70769	3.36944	1	1	0.275			AS to 5'/3' UTRs		5', Rv2444c	2	69
candidate_797	2759635	2759706	+	C	71	20.5972	2.07123	1	0	0.004			Within 5'/3' UTRs	5', Rv2458		147	73
candidate_798	2771580	2771614	+	C	34	8.4	3.04317	0	0	0.04			AS to 5'/3' UTRs	3', Rv2467	3', Rv2468c	9	30
candidate_799	2773048	2773086	+	C	38	0.153846	2.52407	0	0	0.352			AS to 5'/3' UTRs		5', Rv2469c	13	92
candidate_800	2824620	2824659	+	C	39	0	2.49332	0	0	0.352			AS to 5'/3' UTRs	5', Rv2509	5', Rv2508c	27	19
candidate_801	2849542	2849576	+	C	34	0.571429	2.58424	0	0	0.047			Intergenic			210	276
candidate_802	2849624	2849703	+	C	79	0.5125	4.68079	0	0	0.084			Intergenic			292	149
candidate_803	2990602	2990689	+	C	87	0	1.95241	0	0	0.193			Within 5'/3' UTRs	3', Rv2673; 5', Rv2674		10	17
candidate_804	2996011	2996104	+	C	93	0.414894	2.53672	1	0	0.465			Within 5'/3' UTRs	3', Rv2679; 5', Rv2680		66	1
candidate_805	3007064	3007221	+	C	157	0	2.56828	0	0	0.778			AS to 5'/3' UTRs		3', Rv2690c; 5', Rv2689c	2	15
candidate_806	3014984	3015081	+	C	97	20.7653	3.0744	1	0	0.368			AS to 5'/3' UTRs		5', Rv2699c	19	122
candidate_807	3022328	3022373	+	C	45	14.8913	2.60786	0	0	0.076			Within 5'/3' UTRs	3', Rv2709		43	88
candidate_808	3023525	3023564	+	C	39	50.9	1.78578	0	0	0.237			Within 5'/3' UTRs	5', Rv2711		93	1
candidate_809	3031593	3031664	+	C	71	0.0555556	2.20208	0	0	0.029			AS to 5'/3' UTRs		5', Rv2719c	56	181
candidate_810	3051446	3051508	+	C	62	0.222222	2.83783	0	0	0.088			AS to 5'/3' UTRs		5', Rv2737c	22	111
candidate_811	3051524	3051566	+	C	42	0.0232558	2.5345	0	0	0.403			Within 5'/3' UTRs	5', Rv2737A		100	53
candidate_812	3067158	3067192	+	C	34	0	2.35745	0	0	0.189			AS to 5'/3' UTRs		3', Rv2754c; 5', Rv2753c	34	1
candidate_813	3073080	3073129	+	C	49	0	2.86976	0	0	0.846			AS to 5'/3' UTRs		3', Rv2763c; 5', Rv2762c	24	1
candidate_814	3074553	3074590	+	C	37	0	2.0797	0	0	0.06			Within 5'/3' UTRs	5', Rv2765		82	46
candidate_815	3092599	3092648	+	C	49	1.38	2.30512	0	0	0.873			AS to 5'/3' UTRs		5', Rv2783c	2	303
candidate_816	3092696	3092904	+	C	208	2.76077	3.09061	0	0	0.329			AS to 5'/3' UTRs		3', Rv2784c	99	47
candidate_817	3147875	3147958	+	C	83	7.88095	3.7103	0	0	0.58			AS to 5'/3' UTRs		3', Rv2840c; 5', Rv2839c	2	1
candidate_818	3148298	3148339	+	C	41	5.38095	2.20868	0	0	0.648			AS to 5'/3' UTRs		5', Rv2840c	40	46
candidate_819	3155883	3156089	+	C	206	0	1.77192	0	0	0.016			AS to 5'/3' UTRs		3', Rv2848c; 5', Rv2847c	12	59
candidate_820	3192203	3192355	+	C	152	0.20915	2.4932	0	0	0.043			AS to 5'/3' UTRs		3', Rv2883c; 5', Rv2882c	2	18
candidate_821	3200001	3200065	+	C	64	11.9846	3.32295	0	0	0.106			AS to 5'/3' UTRs		5', Rv2890c	19	201
candidate_822	3200137	3200178	+	C	41	4.78571	3.2596	0	0	0.511			Intergenic			155	88
candidate_823	3215593	3215658	+	C	65	3.9697	3.11529	0	0	0.001			AS to 5'/3' UTRs	3', Rv2905	3', Rv2906c	21	7
candidate_824	3217666	3217738	+	C	72	14.589	4.43903	0	0	0.368			AS to 5'/3' UTRs		5', Rv2909c	23	89
candidate_825	3232560	3232628	+	C	68	1.56522	2.39967	0	0	0.045			AS to 5'/3' UTRs		5', Rv2920c	54	243
candidate_826	3232653	3232866	+	C	213	0.130841	2.37937	1	0	0.001			AS to 5'/3' UTRs		3', Rv2921c	147	5
candidate_827	3239479	3239645	+	C	166	0	2.77935	0	0	0.005			AS to 5'/3' UTRs		5', Rv2924c	9	184
candidate_828	3239668	3239724	+	C	56	0	3.1103	0	0	0.315			Intergenic			198	105
candidate_829	3241992	3242030	+	C	38	11.1282	4.80294	0	0	0.469			AS to 5'/3' UTRs		5', Rv2927c	33	168
candidate_830	3318817	3318857	+	C	40	5.65854	2.26632	1	0	0.283			AS to 5'/3' UTRs		3', Rv2966c; 5', Rv2965c	2	44
candidate_831	3319507	3319584	+	C	77	0	2.31985	0	0	0.211			AS to 5'/3' UTRs		3', Rv2967c; 5', Rv2966c	40	79
candidate_832	3336510	3336549	+	C	39	0.525	1.79607	0	0	0.091			Within 5'/3' UTRs	3', Rv2980		5	247
candidate_833	3336569	3336608	+	C	39	0.075	1.79607	0	0	0.106			Within 5'/3' UTRs	3', Rv2980		64	188
candidate_834	3336628	3336667	+	C	39	0	1.79607	0	0	0.117			Intergenic			123	129
candidate_835	3336687	3336726	+	C	39	0	1.79607	0	0	0.09			AS to 5'/3' UTRs		3', Rv2981c	182	70
candidate_836	3336746	3336785	+	C	39	1.15	1.79607	0	0	0.096			AS to 5'/3' UTRs		3', Rv2981c	241	11
candidate_837	3343828	3343970	+	C	142	5.0979	4.05963	0	0	0.698			AS to 5'/3' UTRs		3', Rv2987c; 5', Rv2986c	8	63
candidate_838	3351099	3351144	+	C	45	0.152174	1.77192	0	0	0.018			Intergenic			106	125
candidate_839	3351155	3351200	+	C	45	0	1.77192	0	0	0.012			Within 5'/3' UTRs	5', Rv2994		162	69
candidate_840	3386925	3386994	+	C	69	8.27143	1.77192	0	1*	0.061			Intergenic			111	81
candidate_841	3388875	3388906	+	C	31	89.6875	2.91812	0	0	0.152			AS to 5'/3' UTRs		5', Rv3029c	5	195
candidate_842	3388938	3389004	+	C	66	130.537	2.58291	0	0	0.066			AS to 5'/3' UTRs		5', Rv3029c	68	97
candidate_843	3395270	3395322	+	C	52	1	1.79424	0	0	0.093			Within 5'/3' UTRs	5', Rv3035		349	57
candidate_844	3409424	3409484	+	C	60	29.459	2.55406	0	0	0.256			AS to 5'/3' UTRs		3', Rv3049c; 5', Rv3048c	46	25
candidate_845	3540819	3540852	+	C	33	0.0294118	1.77192	0	0	0.445			AS to 5'/3' UTRs		3', Rv3172c; 5', Rv3171c	74	30
candidate_846	3551163	3551221	+	C	58	0	3.18666	0	0	0.02			Within 5'/3' UTRs	5', Rv3184		119	60
candidate_847	3568771	3568806	+	C	35	7.08333	2.30512	0	0	0.002			Intergenic			92	303
candidate_848	3572557	3572601	+	C	44	4.2	2.30171	1	0	0.202			AS to 5'/3' UTRs		3', Rv3200c; 5', Rv3199c	14	1
candidate_849	3607066	3607100	+	C	34	4.2	2.31567	1	0	0.001			AS to 5'/3' UTRs		3', Rv3230c; 5', Rv3229c	32	12
candidate_850	3626616	3626662	+	C	46	0.87234	2.34107	0	0	0.258			AS to 5'/3' UTRs		3', Rv3246c; 5', Rv3245c	3	1
candidate_851	3627351	3627396	+	C	45	0.478261	2.59119	0	0	0.15			AS to 5'/3' UTRs		3', Rv3247c; 5', Rv3246c	2	23
candidate_852	3725970	3726106	+	C	136	6.51825	4.6238	1	0	0.286			Within 5'/3' UTRs	5', Rv3340		126	21
candidate_853	3777626	3777658	+	C	32	8.15152	2.8067	0	0	0.992			Within 5'/3' UTRs	5', Rv3366		125	79
candidate_854	3820412	3820444	+	C	32	1.72727	1.78081	0	0	0.427			Within 5'/3' UTRs	3', Rv3401		10	209
candidate_855	3820459	3820501	+	C	42	1.18605	2.49234	0	0	0.184			Within 5'/3' UTRs	3', Rv3401		57	152
candidate_856	3820519	3820560	+	C	41	0.309524	2.16565	0	0	0.212			Intergenic			117	93
candidate_857	3835205	3835263	+	C	58	10.5085	2.69509	0	0	0.001			AS to 5'/3' UTRs	3', Rv3416	3', Rv3417c	5	9
candidate_858	3836921	3836981	+	C	60	13	3.23359	0	0	0.001			AS to 5'/3' UTRs		3', Rv3418c; 5', Rv3417c	30	5
candidate_859	3837333	3837504	+	C	171	53.093	4.23041	0	0	0.008			AS to 5'/3' UTRs		3', Rv3419c; 5', Rv3418c	45	51
candidate_860	3862459	3862557	+	C	98	9.35354	2.54974	0	1*	0.583			AS to 5'/3' UTRs		3', Rv3444c; 5', Rv3443c	69	67
candidate_861	3922328	3922371	+	C	43	0	3.59818	0	0	0.458			AS to 5'/3' UTRs		5', Rv3503c	72	100
candidate_862	3952472	3952502	+	C	30	5.06452	3.9327	0	0	0.644			AS to 5'/3' UTRs	5', Rv3516	5', Rv3515c	2	42
candidate_863	3957392	3957423	+	C	31	6.21875	4.22003	0	0	0.141			AS to 5'/3' UTRs		5', Rv3520c	24	98
candidate_864	3985470	3985552	+	C	82	31.3373	4.50385	0	0	0.362			AS to 5'/3' UTRs	5', Rv3546	5', Rv3545c	25	5
candidate_865	3989100	3989136	+	C	36	5	5.10228	1	0	0.027			AS to 5'/3' UTRs	5', Rv3550	5', Rv3549c	2	17
candidate_866	3991534	3991567	+	C	33	2.47059	3.68347	0	0	0.06			Within 5'/3' UTRs	3', Rv3552; 5', Rv3553		11	54
candidate_867	4001592	4001628	+	C	36	16.9189	4.88207	1	0	0.16			AS to 5'/3' UTRs	5', Rv3561	5', Rv3560c	3	9
candidate_868	4012303	4012395	+	C	92	9.52688	3.08637	1	0	0.026			AS to 5'/3' UTRs	5', Rv3571	5', Rv3570c	33	22
candidate_869	4016371	4016411	+	C	40	20.3171	2.13516	1	0	0.462			Within 5'/3' UTRs	5', Rv3574		159	73
candidate_870	4025571	4025623	+	C	52	3.33962	3.03528	0	0	0.025			AS to 5'/3' UTRs		5', Rv3583c	27	207
candidate_871	4040751	4040799	+	C	48	42.0612	2.77198	0	0	0.465			AS to 5'/3' UTRs		5', Rv3596c	47	182
candidate_872	4046121	4046160	+	C	39	4.225	2.40308	0	0	0.504			AS to 5'/3' UTRs		5', Rv3603c	3	143
candidate_873	4047498	4047552	+	C	54	0	2.02295	0	0	0.793			AS to 5'/3' UTRs		5', Rv3604c	2	153
candidate_874	4087372	4087427	+	C	55	28.4464	1.78578	0	0	0.881			Intergenic			115	183
candidate_875	4088534	4088649	+	C	115	3.58621	4.27619	0	0	0.651			AS to 5'/3' UTRs		5', Rv3648c	3	132
candidate_876	4088711	4088745	+	C	34	3	3.03924	0	0	0.892			Within 5'/3' UTRs	5', Rv3649		180	36
candidate_877	4099384	4099497	+	C	113	3.26316	3.93456	0	0	0.065			Intergenic			236	150
candidate_878	4115943	4115991	+	C	48	11.449	2.46924	0	0	0.473			AS to 5'/3' UTRs	5', Rv3675	5', Rv3674c	49	11
candidate_879	4121667	4121739	+	C	72	9.58904	1.92029	0	0	0.749			Intergenic			113	177
candidate_880	4134610	4134658	+	C	48	3.83673	3.2361	0	0	0.754			Within 5'/3' UTRs	3', Rv3692; 5', Rv3693		18	68
candidate_881	4153681	4153717	+	C	36	43.4324	4.59214	0	0	0.836			Intergenic			198	143
candidate_882	4156805	4156850	+	C	45	0	1.79607	0	0	0.151			AS to 5'/3' UTRs		5', Rv3711c	76	131
candidate_883	4156864	4156909	+	C	45	0	1.79607	0	0	0.148			Within 5'/3' UTRs	5', Rv3712		135	72
candidate_884	4156923	4156977	+	C	54	0	2.48175	0	0	0.35			Within 5'/3' UTRs	5', Rv3712		194	4
candidate_885	4160977	4161012	+	C	35	5.19444	1.77192	0	0	0.878			AS to 5'/3' UTRs	5', Rv3716c	5', Rv3717	64	36
candidate_886	4200244	4200285	+	C	41	0.619048	2.43997	1	0	0.896			AS to 5'/3' UTRs		5', Rv3753c	23	136
candidate_887	4217095	4217130	+	C	35	0.222222	1.78578	1	0	0.757			AS to 5'/3' UTRs	5', Rv3772	5', Rvnt44	39	4
candidate_888	4266745	4266777	+	C	32	23.0303	2.33384	0	0	0.241			Intergenic			87	176
candidate_889	4273592	4273665	+	C	73	4.77027	2.32078	0	0	0.254			Within 5'/3' UTRs	5', Rv3810		117	74
candidate_890	4316733	4316764	+	C	31	0.78125	4.32864	0	0	0.535			Intergenic			137	2011
candidate_891	4348726	4348825	+	C	99	0.54	2.55771	0	0	0.331			Within 5'/3' UTRs	3', Rv3870; 5', Rv3871		2	2
candidate_892	1902	1943	-	A	41	190.429	1.24613	0	0	0.768	0.990456	1	Intergenic			378	109
candidate_893	2213	2305	-	A	92	226.613	0	1	0	0.731	0.999971	1	AS		Rv0002	-1047	-253
candidate_894	2979	3057	-	A	78	351.43	0	1	0	0.905	0.999382	1	AS		Rv0002	-281	-1005
candidate_895	5179	5287	-	A	108	301.303	0	0	0	0.492	0.000910046	0.966469	AS		Rv0005	-2088	-164
candidate_896	6228	6277	-	A	49	206.1	0	1	0	0.509	0.0124514	1	AS		Rv0005	-1039	-1154
candidate_897	7061	7102	-	A	41	97.8095	0	1	0	0.549	0.985963	1	AS		Rv0005	-206	-1979
candidate_898	7201	7255	-	A	54	289.673	0	0	0	0.83	2.75886e-07	0.000325822	AS		Rv0005	-66	-2132
candidate_899	8055	8247	-	A	192	843.969	0	0	1	0.227	0.948516	1	AS		Rv0006	-1763	-945
candidate_900	25623	25728	-	A	105	325.66	0.098178	1	0	0.121	0.983842	1	AS		Rvnt03	-103	-84
candidate_901	25779	25816	-	A	37	116.421	0.138043	0	0	0.463	0.819512	1	AS to 5'/3' UTRs		3', Rvnt03	53	97
candidate_902	44050	44092	-	A	42	546.674	0	0	0	0.036	0.883233	1	AS		Rv0041	-2421	-530
candidate_903	51124	51185	-	A	61	537.048	0.636316	0	0	0.837	0	0	Within 5'/3' UTRs	3', Rv0047c; 5', Rv0046c		0	0
candidate_904	51727	51759	-	A	32	394.394	0.13386	1	0	0.379	3.33931e-09	4.06394e-06	Within 5'/3' UTRs	3', Rv0048c; 5', Rv0047c		0	69
candidate_905	58145	58220	-	A	75	549.447	2.83907	1	0	0.018	0.00270846	1	AS to 5'/3' UTRs		5', Rv0053	-337	-28
candidate_906	59359	59410	-	A	51	287.769	0.0822948	1	0	0.635	0.970117	1	AS to 5'/3' UTRs		3', Rv0055; 5', Rv0056	-508	-288
candidate_907	65119	65185	-	A	66	420.687	0	0	1	0.929	0.246737	1	AS		Rv0061	-297	-194
candidate_908	65234	65389	-	A	155	170.468	0	0	0	0.995	6.03673e-05	0.0672491	AS		Rv0061	-182	-398
candidate_909	81688	81732	-	A	44	140.244	0	0	0	0.677	0.987065	1	AS		Rv0073	-980	-56
candidate_910	82249	82353	-	A	104	178.952	0	1	0	0.254	0.851711	1	AS		Rv0073	-419	-677
candidate_911	87848	88008	-	A	160	164.422	0.0482347	1	0	0.411	1.22293e-09	1.49686e-06	Within 5'/3' UTRs	5', Rv0078A		47	196
candidate_912	89426	89466	-	A	40	114.902	0	0	0	0.949	0.103673	1	AS		Rv0080	-54	-444
candidate_913	97097	97143	-	A	46	427.66	0	0	0	0.459	0.607773	1	AS		Rv0088	-504	-216
candidate_914	97268	97324	-	A	56	208.912	0	1	0	0.535	0.978441	1	AS		Rv0088	-333	-397
candidate_915	97771	97818	-	A	47	119.333	0	0	0	0.732	0.123976	1	AS		Rv0089	-580	-60
candidate_916	99719	99756	-	A	37	173.658	0	0	0	0.588	0.965557	1	AS		Rv0091	-732	-72
candidate_917	110154	110205	-	A	51	177.558	0	1	0	0.839	0.96609	1	AS		Rv0101	-7385	-204
candidate_918	110254	110300	-	A	46	93.8511	0	0	0	0.761	0.384186	1	AS		Rv0101	-7285	-299
candidate_919	110447	110563	-	A	116	141.342	0	1	1	0.747	1.01857e-07	0.00012121	AS		Rv0101	-7092	-562
candidate_920	137589	137696	-	A	107	624.898	0	1	0	0.273	0.623583	1	AS		Rv0113	-320	-377
candidate_921	149463	149495	-	A	32	74.2424	0.126212	0	0	0.759	0.933721	1	AS to 5'/3' UTRs		5', Rv0124	239	38
candidate_922	151321	151364	-	A	43	229.386	0	0	1	0.23	0.0859056	1	AS		Rv0125	-894	-216
candidate_923	151399	151431	-	A	32	160.727	0	0	0	0.546	0.991477	1	AS		Rv0125	-816	-283
candidate_924	155800	155851	-	A	51	142.308	0	1	0	0.139	0.810576	1	AS		Rv0128	-646	-184
candidate_925	156522	156568	-	A	46	1451.79	0.811662	0	0	0.001	6.35021e-05	0.0706143	AS to 5'/3' UTRs	3', Rv0129c	3', Rv0128	76	10
candidate_926	170705	170736	-	A	31	274.906	0	0	1	0.284	0.999999	1	AS		Rv0144	-421	-452
candidate_927	185055	185087	-	A	32	77.4848	0	0	0	0.974	1.4444e-13	1.85028e-10	AS		Rv0157	-1424	-35
candidate_928	196557	196643	-	A	86	798.333	0	1	0	0.322	0.99971	1	AS		Rv0166	-100	-1650
candidate_929	196709	196776	-	A	67	514.235	1.70661	0	0	0.388	0.810963	1	AS to 5'/3' UTRs		3', Rv0166	52	85
candidate_930	196827	196944	-	A	117	360.822	0.0386052	0	0	0.579	4.72643e-09	5.73789e-06	AS to 5'/3' UTRs		5', Rv0167	-831	-83
candidate_931	196985	197017	-	A	32	100.212	0	0	0	0.95	0.998425	1	AS		Rv0167	-673	-156
candidate_932	199402	199508	-	A	106	416.888	0	1	1	0.905	0.012647	1	AS		Rv0169	-496	-974
candidate_933	200964	201008	-	A	44	148.156	0	1	0	0.894	0.39111	1	AS		Rv0171	-1515	-76
candidate_934	202609	202648	-	A	39	127.55	0	1	1	0.992	0.150533	1	AS		Rv0172	-1459	-172
candidate_935	202732	202825	-	A	93	568.309	0	1	1	0.298	0.812316	1	AS		Rv0172	-1336	-349
candidate_936	205275	205351	-	A	76	100.519	0	0	0	0.672	0.999631	1	AS		Rv0174	-1503	-120
candidate_937	206462	206493	-	A	31	112.906	0	0	0	0.177	0.910585	1	AS		Rv0174	-316	-1262
candidate_938	208576	208664	-	A	88	130.719	0	0	1	0.362	0.620899	1	AS		Rv0177	-395	-247
candidate_939	214453	214483	-	A	30	98.9032	0	0	1	0.784	0.999976	1	AS		Rv0183	-474	-395
candidate_940	218035	218065	-	A	30	213.71	0	0	0	0.107	0.999545	1	AS		Rv0186	-309	-1796
candidate_941	218110	218292	-	A	182	95.1421	0	0	0	0.14	0.0428779	1	AS		Rv0186	-234	-2023
candidate_942	218355	218413	-	A	58	214.559	0.191364	0	0	0.443	0.00493963	1	AS to 5'/3' UTRs	3', Rv4014	3', Rv0186	11	292
candidate_943	218503	218610	-	A	107	343.537	0.410797	1	1	0.65	0	0	Within 5'/3' UTRs	5', Rv4014		159	95
candidate_944	219424	219601	-	A	177	252.146	0.0473068	0	1	0.66	0.970523	1	AS to 5'/3' UTRs		5', Rv0188	-493	-115
candidate_945	219653	219782	-	A	129	220.108	0	0	0	0.722	5.20137e-06	0.00595037	AS		Rv0188	-264	-296
candidate_946	219830	219996	-	A	166	758.772	0.0636485	0	0	0.073	0.135347	1	AS to 5'/3' UTRs	3', Rv0189c	3', Rv0188	-87	-510
candidate_947	223462	223494	-	A	32	91.5152	0	0	0	0.798	0.779658	1	AS		Rv0191	-68	-1205
candidate_948	223578	223653	-	A	75	1532.64	0	1	0	0.989	0.774771	1	AS		Rv0192	-1086	-89
candidate_949	234459	234493	-	A	34	564.343	0	0	1	0.001	0.999859	1	AS	3', Rv0198c	Rv0197	-60	-2262
candidate_950	236632	236705	-	A	73	197.189	0	0	1	0.551	0.392181	1	AS		Rv0199	-577	-155
candidate_951	247318	247384	-	A	66	639.746	0.979425	0	0	0.319	0	0	Within 5'/3' UTRs	3', Rv0207c; 5', Rv0206c		0	0
candidate_952	262837	262878	-	A	41	156.476	0	1	0	0.961	0.990761	1	AS		Rv0220	-1186	-66
candidate_953	288963	289002	-	A	39	383.45	0	0	0	0.077	0.660512	1	AS		Rv0238	-79	-574
candidate_954	292064	292098	-	A	34	268.8	1.5949	1	0	0.241	0.989262	1	AS to 5'/3' UTRs	5', Rv0242c	5', Rv0243	35	73
candidate_955	292269	292301	-	A	32	93.0303	0	0	1	0.62	0.989587	1	AS		Rv0243	-1224	-130
candidate_956	292336	292390	-	A	54	97.1818	0	1	0	0.582	8.02932e-10	9.84395e-07	AS		Rv0243	-1157	-219
candidate_957	302034	302109	-	A	75	188.908	0.138043	0	0	0.752	2.25219e-05	0.0254047	Within 5'/3' UTRs	3', Rv0251c; 5', Rv0250c		6	64
candidate_958	302652	302683	-	A	31	113	0.528831	0	0	0.438	0.000168913	0.184453	Within 5'/3' UTRs	5', Rv0251c		0	183
candidate_959	309893	309930	-	A	37	144.237	0	0	0	0.994	0.339684	1	AS		Rv0257	-180	-231
candidate_960	326118	326149	-	A	31	131.781	0	0	0	0.955	0.983627	1	AS		Rv0270	-131	-1582
candidate_961	330428	330531	-	A	103	140.163	0	0	0	0.387	0.99027	1	AS		Rv0274	-575	-109
candidate_962	331658	331690	-	A	32	1559.24	0.13386	1	0	0.734	0.0595929	1	AS to 5'/3' UTRs	5', Rv0275c	5', Rv0276	0	58
candidate_963	332363	332401	-	A	38	187.436	0	0	0	0.876	0.99321	1	AS		Rv0276	-305	-653
candidate_964	333170	333232	-	A	62	131.19	0.0194826	1	0	0.732	1.93573e-12	2.45838e-09	Within 5'/3' UTRs	5', Rv0277c		34	205
candidate_965	333304	333417	-	A	113	274.096	0.0724081	1	0	0.751	0	0	Within 5'/3' UTRs	3', Rv0277c		168	20
candidate_966	340105	340182	-	A	77	155.103	0	0	1	0.507	0.999954	1	AS		Rv0280	-869	-818
candidate_967	341706	342083	-	A	377	555.981	0.174169	1	1	0.963	5.20441e+09	0	Within 5'/3' UTRs	3', Rv0281; 5', Rv0282		-200	-1085
candidate_968	342222	342259	-	A	37	123.368	0	1	0	0.478	0.982496	1	AS		Rv0282	-1803	-129
candidate_969	345731	345764	-	A	33	105.059	0	0	0	0.642	0.0701532	1	AS		Rv0284	-3896	-129
candidate_970	345820	345941	-	A	121	155.582	0	1	0	0.685	1.34512e-06	0.00156438	AS		Rv0284	-3807	-306
candidate_971	347408	347481	-	A	73	331.338	0	1	0	0.977	0.395036	1	AS		Rv0284	-2219	-1846
candidate_972	348129	348165	-	A	36	127.081	0	1	1	0.515	0.953148	1	AS		Rv0284	-1498	-2530
candidate_973	348400	348483	-	A	83	980.381	0	1	1	0.447	0.98302	1	AS		Rv0284	-1227	-2848
candidate_974	350509	350645	-	A	136	320.759	0	0	1	0.829	0.974026	1	AS		Rv0286	-967	-710
candidate_975	352874	352919	-	A	45	247.109	0	0	1	0.35	0.858466	1	AS		Rv0289	-162	-770
candidate_976	353000	353066	-	A	66	84.6567	0.245858	0	0	0.298	8.56761e-07	0.00100155	AS to 5'/3' UTRs		3', Rv0289; 5', Rv0290	-36	-917
candidate_977	363331	363373	-	A	42	189.186	0	1	0	0.585	0.173966	1	AS		Rv0298	-148	-121
candidate_978	377362	377410	-	A	48	137.02	0	0	0	0.711	0.894156	1	AS		Rv0308	-467	-297
candidate_979	377793	377852	-	A	59	149.017	0.0529164	1	0	0.677	0.531783	1	AS to 5'/3' UTRs		3', Rv0308	-36	-739
candidate_980	382467	382510	-	A	43	340.295	0.0675132	0	1	0.044	0.563158	1	AS to 5'/3' UTRs		5', Rv0313	-409	-20
candidate_981	382546	382593	-	A	47	111.688	0	0	0	0.154	0.999853	1	AS		Rv0313	-330	-103
candidate_982	410873	410904	-	A	31	248.562	0	0	1*	0.807	0.909345	1	AS		Rv0342	-1887	-66
candidate_983	418831	418895	-	A	64	1612.91	0	1	0	0.935	0.488858	1	AS		Rv0348	-115	-602
candidate_984	419704	419750	-	A	46	507.915	0.138043	1	0	0.242	4.89765e-06	0.0056078	Intergenic			96	85
candidate_985	419793	419827	-	A	34	135.343	0.441036	0	0	0.29	0.997146	1	AS to 5'/3' UTRs		5', Rv0350	185	8
candidate_986	420887	420931	-	A	44	501.6	0	1	0	0.522	0.00434746	1	AS		Rv0350	-825	-1096
candidate_987	421317	421404	-	A	87	315.08	0	1	0	0.913	0.791048	1	AS		Rv0350	-395	-1569
candidate_988	421805	421840	-	A	35	63.7222	0	0	0	0.001	0.803805	1	AS		Rv0351	-611	-131
candidate_989	462002	462038	-	A	36	557.189	1.24777	1	0	0.309	5.16562e-10	6.34855e-07	Within 5'/3' UTRs	5', Rv0384c		0	97
candidate_990	476380	476418	-	A	38	255.769	0.0946638	0	1	0.898	0.667989	1	AS to 5'/3' UTRs		5', Rv4003	196	261
candidate_991	491728	491763	-	A	35	79	0	0	1	0.535	0.895509	1	AS		Rv0407	-65	-980
candidate_992	499630	499663	-	A	33	103.353	0.233548	1	0	0.443	0.999882	1	AS to 5'/3' UTRs	5', Rv0412c	5', Rv0413	11	50
candidate_993	515854	515917	-	A	63	1379.97	0.0729743	0	0	0.964	0.000287458	0.311892	Within 5'/3' UTRs	5', Rv0426c		38	100
candidate_994	522143	522184	-	A	41	126.143	0.0410918	1	1	0.632	0.932688	1	AS to 5'/3' UTRs		3', Rv0434	-24	-670
candidate_995	551732	551853	-	A	121	352.27	0.00957039	1	1	0.312	0.865244	1	AS to 5'/3' UTRs		5', Rv0460	-256	-104
candidate_996	551903	552008	-	A	105	123.481	0.0162204	0	0	0.557	0.660078	1	AS to 5'/3' UTRs		3', Rv0460	-85	-259
candidate_997	552039	552164	-	A	125	144.421	0	1	0	0.611	0.994587	1	AS		Rv0461	-511	-138
candidate_998	552199	552276	-	A	77	144.462	0	0	0	0.919	0.99696	1	AS		Rv0461	-351	-250
candidate_999	553260	553300	-	A	40	176.683	0	0	0	0.04	0.604057	1	AS		Rv0462	-748	-686
candidate_1000	553379	553523	-	A	144	278.559	0	1	0	0.837	0.437922	1	AS		Rv0462	-629	-909
candidate_1001	556570	556627	-	A	57	167.448	0	1	1	0.719	0.000836487	0.890022	AS		Rv0466	-682	-169
candidate_1002	559617	559650	-	A	33	105.235	0	0	1	0.545	0.999688	1	AS		Rv0468	-138	-755
candidate_1003	572607	572654	-	A	47	304.146	0	0	0	0.697	7.34413e-14	9.42986e-11	AS		Rv0483	-458	-944
candidate_1004	572685	572737	-	A	52	454.755	0	1	0	0.601	2.60294e-08	3.12873e-05	AS		Rv0483	-380	-1027
candidate_1005	573973	574013	-	A	40	132.341	0.033669	0	0	0.918	4.49307e-11	5.62083e-08	AS to 5'/3' UTRs		5', Rv0485	-1327	-29
candidate_1006	579471	579503	-	A	32	82.7576	0	0	0	0.596	0.934598	1	AS		Rv0490	-1110	-154
candidate_1007	580526	580568	-	A	42	227.977	0	1	0	0.759	1.10699e-07	0.00013151	AS		Rv0490	-55	-1219
candidate_1008	587585	587733	-	A	148	234.067	0	1	1	0.802	1.05471e-14	1.3648e-11	AS		Rv0497	-724	-356
candidate_1009	588072	588102	-	A	30	439.484	0	0	1	0.75	0.98423	1	AS		Rv0497	-237	-725
candidate_1010	592613	592658	-	A	45	164.109	0	0	1	0.615	0.0387751	1	AS		Rv0501	-171	-1004
candidate_1011	592989	593126	-	A	137	252.551	0	1	1	0.471	0.149488	1	AS		Rv0502	-878	-335
candidate_1012	601177	601333	-	A	156	239.025	0	1	0	0.563	0.999442	1	AS		Rv0509	-670	-892
candidate_1013	610175	610207	-	A	32	581.364	0.0501974	0	0	0.9	0.771085	1	AS to 5'/3' UTRs		5', Rv0518	-708	-19
candidate_1014	610868	610955	-	A	87	141.659	0.103814	0	0	0.047	0.999315	1	AS to 5'/3' UTRs		3', Rv0518	-15	-767
candidate_1015	621921	622028	-	A	107	391.75	0	0	1	0.789	0.999361	1	AS		Rv0530	-203	-1121
candidate_1016	622097	622295	-	A	198	1084.05	1.01944	1	0	0.849	0	0	AS to 5'/3' UTRs		3', Rv0530; 5', Rv0531	-27	-1388
candidate_1017	631730	631856	-	A	126	172.717	0.00749803	0	0	0.164	3.3263e-06	0.0038319	AS to 5'/3' UTRs		5', Rv0539	-645	-113
candidate_1018	631900	631940	-	A	40	96.0244	0	1	1	0.394	0	0	AS		Rv0539	-475	-197
candidate_1019	658913	658965	-	A	52	100.604	0	0	0	0.148	0.411556	1	AS		Rv0567	-427	-644
candidate_1020	665588	665795	-	A	207	355.918	0.134788	1	0	0.981	0.0437344	1	Within 5'/3' UTRs	3', Rv0573c; 5', Rv4004		205	56
candidate_1021	670927	670965	-	A	38	120.667	0	0	0	0.983	0.9209	1	AS		Rv0576	-225	-1117
candidate_1022	675996	676032	-	A	36	1016.14	0.0876862	1	0	0.229	0.903167	1	Intergenic			80	206
candidate_1023	686414	686446	-	A	32	126.364	0	1	1	0.874	0.977164	1	AS		Rv0588	-401	-518
candidate_1024	704212	704245	-	A	33	1996.5	0.138043	0	0	0.001	0.132631	1	Intergenic			155	507
candidate_1025	728522	728556	-	A	34	253.457	0.138043	0	0	1	0.938609	1	Within 5'/3' UTRs	3', Rv0632c		216	27
candidate_1026	731147	731191	-	A	44	142.956	0	1	0	0.285	0.835733	1	AS		Rv0634A	-217	-78
candidate_1027	731280	731377	-	A	97	192.112	0.0183118	0	0	0.96	0.94094	1	AS to 5'/3' UTRs		3', Rv0634A	-84	-264
candidate_1028	731588	731749	-	A	161	567.877	0.0405491	1	0	0.21	0.999909	1	AS		Rvnt07; 5', Rv634B	-291	-146
candidate_1029	732392	732787	-	A	395	606.407	0	1	0	0.61	4.02258e+08	0.04464	AS		Rv0636	-429	-857
candidate_1030	733524	733557	-	A	33	185.882	0	0	0	0.505	0.999442	1	AS		Rvnt08	-72	-33
candidate_1031	734197	734273	-	A	76	270.545	0.0537829	0	0	0.867	0.32668	1	AS to 5'/3' UTRs		3', Rv0638; 5', Rv0639	-773	-536
candidate_1032	734379	734549	-	A	170	209.702	0	1	1	0.523	0.000204891	0.223331	AS		Rv0639	-591	-295
candidate_1033	737203	737237	-	A	34	146.971	0.0835121	0	0	0.622	0.951645	1	Within 5'/3' UTRs	3', Rv0643c; 5', Rv0642c		0	31
candidate_1034	739186	739227	-	A	41	510.286	0.0791619	1	0	0.031	0.986953	1	Within 5'/3' UTRs	5', Rv0644c		26	100
candidate_1035	748168	748203	-	A	35	106.444	1.64649	0	0	0.001	0.527063	1	AS to 5'/3' UTRs		5', Rv0651	223	73
candidate_1036	748797	748829	-	A	32	326.364	0.071113	0	0	0.724	0.656081	1	AS to 5'/3' UTRs		3', Rv0651; 5', Rv0652	-15	-553
candidate_1037	758524	758615	-	A	91	152.141	0.0105033	1	1	0.264	0.999859	1	AS to 5'/3' UTRs		5', Rv0664	-280	-83
candidate_1038	760159	760260	-	A	101	195.059	0	0	0	0.712	0.998813	1	AS		Rv0667	-3166	-453
candidate_1039	767311	767371	-	A	60	168.131	1.40501	0	1	0.078	2.21702e-05	0.0250301	AS to 5'/3' UTRs		3', Rv0668	-9	-4001
candidate_1040	771525	771559	-	A	34	139.629	0	0	0	0.789	0.0357022	1	AS		Rv0672	-1587	-75
candidate_1041	781427	781459	-	A	32	156.364	0.569987	1	0	0.37	0.993916	1	Intergenic			116	101
candidate_1042	782459	782605	-	A	146	179.442	0.301347	0	0	0.727	0.322017	1	AS to 5'/3' UTRs		5', Rv0684	-2131	-120
candidate_1043	784454	784764	-	A	310	490.527	0.222253	0	1	0.482	0.995528	1	AS to 5'/3' UTRs		3', Rv0684; 5', Rv0685	-136	-2279
candidate_1044	793856	793889	-	A	33	110.382	0	0	0	0.623	0.99359	1	AS		Rv0694	-669	-554
candidate_1045	800695	800726	-	A	31	112.188	0	0	0	0.015	0.998188	1	AS		Rv0700	-97	-239
candidate_1046	800777	800866	-	A	89	172.556	0	1	0	0.199	0.996019	1	AS to 5'/3' UTRs		3', Rv0700; 5', Rv0701	-685	-379
candidate_1047	802107	802181	-	A	74	120.853	0	1	0	0.597	0.92419	1	AS		Rv0702; Rv0703	-328	-719
candidate_1048	802237	802319	-	A	82	124.988	0	1	0	0.89	0.929255	1	AS		Rv0703	-198	-186
candidate_1049	802488	802568	-	A	80	618.642	0.279597	1	0	0.144	0.981033	1	AS to 5'/3' UTRs		5', Rv0704	-882	-40
candidate_1050	802703	802807	-	A	104	338.305	0	0	0	0.4	0.938352	1	AS		Rv0704	-667	-279
candidate_1051	803377	803414	-	A	37	122.579	0.119879	0	0	0.999	0.995788	1	AS to 5'/3' UTRs		3', Rv0704; 3', Rv0705	-315	-3
candidate_1052	803460	803706	-	A	246	310.769	0	1	0	0.034	0.00184813	1	AS		Rv0705	-822	-295
candidate_1053	804227	804354	-	A	127	343.352	0	0	1	0.482	0.819286	1	AS		Rv0706; Rv0707	-879	-665
candidate_1054	805396	805629	-	A	233	1698.39	0	1	1	0.3	0.585486	1	AS		Rv0708; Rv0709	-363	-519
candidate_1055	806143	806218	-	A	75	114.382	0.904893	0	1	0.002	0.0965979	1	AS to 5'/3' UTRs		3', Rv0710	-23	-462
candidate_1056	814755	814926	-	A	171	163.517	0	0	1	0.832	0.992179	1	AS		Rv0721	-235	-598
candidate_1057	826462	826492	-	A	30	106.935	0	0	0	0.448	0.987522	1	AS		Rv0733	-205	-370
candidate_1058	850611	850642	-	A	31	92.0312	0.649309	0	0	0.66	0.785027	1	Within 5'/3' UTRs	3', Rvnt09		84	0
candidate_1059	851545	851743	-	A	198	1195.92	0.204462	1	0	0.924	0	0	AS to 5'/3' UTRs		5', Rv0757	-806	-135
candidate_1060	852061	852103	-	A	42	113.302	0	0	0	0.492	0.884471	1	AS		Rv0757	-290	-495
candidate_1061	852521	852555	-	A	34	120.343	0	0	0	0.83	0.891412	1	AS		Rv0758	-1332	-159
candidate_1062	852588	852656	-	A	68	202.884	0	0	0	0.245	0.00369916	1	AS		Rv0758	-1265	-260
candidate_1063	860867	860910	-	A	43	155.318	0.138043	0	0	0.184	0.463414	1	AS to 5'/3' UTRs		5', Rv0768	157	2
candidate_1064	872009	872104	-	A	95	200.156	0	1	1	0.939	2.17217e-05	0.0245455	AS		Rv0778	-666	-673
candidate_1065	873982	874081	-	A	99	171.7	0	0	0	0.298	0.999084	1	AS		Rv0780	-254	-738
candidate_1066	874587	874625	-	A	38	72.0769	0	0	0	0.429	0.00484554	1	AS		Rv0781	-356	-392
candidate_1067	874709	874749	-	A	40	225.122	0	1	0	0.071	0.998165	1	AS		Rv0781; Rv0782	-1681	-516
candidate_1068	880366	880409	-	A	43	246.227	0	1	0	0.186	0.985974	1	AS		Rv0785	-674	-1069
candidate_1069	882283	882367	-	A	84	297.588	0	1	1	0.739	0.00806695	1	AS		Rv0787	-135	-908
candidate_1070	898831	898899	-	A	68	165.406	0	0	0	0.05	0.907075	1	AS		Rv0805	-956	-68
candidate_1071	899569	899624	-	A	55	396.536	0	0	0	0.439	0.94783	1	AS		Rv0805	-218	-793
candidate_1072	904079	904157	-	A	78	158.418	0	0	0	0.549	0.89486	1	AS		Rv0809	-740	-432
candidate_1073	904787	904881	-	A	94	220.968	0.0900911	0	1	0.812	2.38836e-06	0.00275616	AS to 5'/3' UTRs	3', Rv0810c	3', Rv0809	-32	-1156
candidate_1074	905114	905163	-	A	49	233.2	4.63132	1	0	0.43	0	0	Within 5'/3' UTRs	3', Rv0811c; 5', Rv0810c		27	71
candidate_1075	909367	909583	-	A	216	804.862	2.35729	1	0	0.354	0.377145	1	Within 5'/3' UTRs	3', Rv0816c; 5', Rv0815c		49	28
candidate_1076	912891	912929	-	A	38	117.385	0	1	0	0.957	0.975003	1	AS		Rv0820	-611	-203
candidate_1077	919570	919617	-	A	47	1384.17	0.53351	1	0	0.666	0.000148164	0.162387	AS to 5'/3' UTRs	5', Rv0825c	5', Rv0826	17	17
candidate_1078	923999	924034	-	A	35	197.083	0	0	0	0.252	0.994738	1	AS		Rvnt11	-73	-35
candidate_1079	937859	937899	-	A	40	96.0488	0.138043	0	0	0.398	0.995098	1	AS to 5'/3' UTRs		3', Rv0841	24	213
candidate_1080	937956	938239	-	A	283	668.528	0.0670921	1	0	0.048	0	0	AS to 5'/3' UTRs		5', Rv0842	-1448	-127
candidate_1081	944451	944493	-	A	42	95.6977	0	0	0	0.223	0.707276	1	AS		Rv0847	-284	-150
candidate_1082	965543	965597	-	A	54	230.309	3.64724	0	0	0.914	0.0180849	1	Within 5'/3' UTRs	5', Rv0867c		8	386
candidate_1083	965725	965759	-	A	34	67.8286	0.915624	0	0	0.53	2.6968e-08	3.23885e-05	Intergenic			190	224
candidate_1084	976049	976090	-	A	41	681.429	0.0821683	0	0	0.748	0.999907	1	AS to 5'/3' UTRs		5', Rv0877	-814	-15
candidate_1085	983465	983647	-	A	182	522.153	0	1	1	0.732	0.997996	1	AS		Rv0885	-319	-885
candidate_1086	987053	987162	-	A	109	460.755	0.138043	1	0	0.27	0.000373306	0.402798	AS to 5'/3' UTRs		5', Rv0888	1082	71
candidate_1087	987896	987951	-	A	55	135.732	0	0	0	0.463	0.999816	1	AS		Rv0888	-809	-718
candidate_1088	988225	988255	-	A	30	134.613	0	1	0	0.452	0.979273	1	AS		Rv0888	-480	-1022
candidate_1089	995028	995098	-	A	70	104.085	0	1	0	0.246	0.981142	1	AS		Rv0892	-312	-1245
candidate_1090	999814	999852	-	A	38	312.205	0	0	1	0.777	0.389243	1	AS		Rv0896	-953	-380
candidate_1091	1000043	1000095	-	A	52	314.019	0	0	0	0.766	0.177001	1	AS		Rv0896	-724	-623
candidate_1092	1002798	1002842	-	A	44	377.289	0.039879	1	0	0.308	0.998881	1	AS to 5'/3' UTRs		5', Rv0899	-994	-30
candidate_1093	1014668	1014744	-	A	76	152.403	0.0215132	0	0	0.288	0.887879	1	AS to 5'/3' UTRs		5', Rv0909	-192	-63
candidate_1094	1027094	1027159	-	A	65	165.167	0.0155456	0	0	0.397	0.999817	1	AS to 5'/3' UTRs		5', Rv0921	-591	-55
candidate_1095	1027194	1027278	-	A	84	101.4	0	1	0	0.468	0.948663	1	AS		Rv0921	-491	-174
candidate_1096	1041129	1041165	-	A	36	226.811	0.138043	1	1	0.955	1.1974e-10	1.48478e-07	Intergenic			81	99
candidate_1097	1043759	1043814	-	A	55	212.536	0	0	0	0.67	0.976625	1	AS		Rv0935	-556	-515
candidate_1098	1061654	1061732	-	A	78	887.405	1.41565	1	0	0.624	0.488994	1	Within 5'/3' UTRs	5', Rv0950c		0	232
candidate_1099	1061936	1062000	-	A	64	192.8	0.0573409	0	0	0.995	0.211924	1	AS to 5'/3' UTRs		5', Rv0951	-1191	-36
candidate_1100	1062221	1062264	-	A	43	92.2045	0	0	1	0.497	0.704234	1	AS		Rv0951	-906	-300
candidate_1101	1063127	1063224	-	A	97	181.592	0	0	1	0.68	0.999924	1	AS to 5'/3' UTRs		3', Rv0951; 5', Rv0952	-924	-84
candidate_1102	1065547	1065604	-	A	57	375.931	0	1	0	0.933	0.999506	1	AS		Rv0954	-491	-477
candidate_1103	1067826	1067877	-	A	51	121.192	0	1	1	0.37	0.279392	1	AS		Rv0956	-382	-316
candidate_1104	1068089	1068126	-	A	37	90.5789	0	0	1	0.749	0.818255	1	AS		Rv0956	-119	-565
candidate_1105	1073268	1073304	-	A	36	83.2432	0.115657	1	0	0.308	0.9995	1	AS to 5'/3' UTRs		3', Rv0959	-5	-2049
candidate_1106	1074111	1074143	-	A	32	170.788	0	0	0	0.024	0.999969	1	AS		Rv0961	-310	-69
candidate_1107	1074200	1074233	-	A	33	265.971	0	1	0	0.834	0.99998	1	AS		Rv0961	-221	-159
candidate_1108	1097350	1097421	-	A	71	223.403	0	0	0	0.716	0.109935	1	AS		Rv0981	-158	-605
candidate_1109	1097463	1097506	-	A	43	130.182	0	0	0	0.342	0.0645939	1	AS		Rv0981	-45	-690
candidate_1110	1097688	1097721	-	A	33	181.353	0	1	0	0.669	0.996452	1	AS		Rv0982	-1334	-213
candidate_1111	1099040	1099141	-	A	101	240.5	0.033834	1	0	0.211	0.108537	1	AS to 5'/3' UTRs		3', Rv0982; 5', Rv0983	-1420	-75
candidate_1112	1099540	1099583	-	A	43	232.886	0	0	1	0.679	4.47369e-06	0.00512684	AS		Rv0983	-920	-517
candidate_1113	1103589	1103624	-	A	35	104.722	0	1	0	0.81	0.935695	1	AS		Rv0983	-1520	-1082
candidate_1114	1106307	1106337	-	A	30	207.226	0.138043	1	0	0.693	0.999998	1	AS to 5'/3' UTRs	3', Rv0989c	3', Rv0988	31	68
candidate_1115	1108504	1108550	-	A	46	1042.45	2.22245	1	1	0.951	0	0	Within 5'/3' UTRs	3', Rv0992c; 5', Rv0991c		0	28
candidate_1116	1113505	1113581	-	A	76	794.649	0.00896382	0	0	0.382	1	1	AS		Rvnt15	-78	-70
candidate_1117	1124112	1124285	-	A	173	218.983	0	1	0	0.07	0.364399	1	AS		Rv1006	-1305	-571
candidate_1118	1127902	1128064	-	A	162	777.865	1.06734	1	1	0.496	0.989225	1	AS to 5'/3' UTRs		3', Rv1008; 5', Rv1009	19	27
candidate_1119	1131583	1131614	-	A	31	70.1562	0.482051	0	0	0.495	0.979749	1	AS to 5'/3' UTRs		5', Rv1013	162	11
candidate_1120	1131945	1132039	-	A	94	220.621	0	0	1	0.213	0.999604	1	AS		Rv1013	-1314	-414
candidate_1121	1132075	1132182	-	A	107	321.389	0	0	0	0.055	7.27528e-05	0.0806101	AS		Rv1013	-1184	-557
candidate_1122	1148207	1148237	-	A	30	101.065	0.113302	1	0	0.366	0.995174	1	Intergenic			229	190
candidate_1123	1169232	1169315	-	A	83	215.798	0.0825635	0	0	0.626	5.55112e-17	7.24421e-14	Within 5'/3' UTRs	5', Rv1046c		4	108
candidate_1124	1196674	1196801	-	A	127	168.672	0	0	1	0.149	0.964289	1	AS		Rv1072	-441	-522
candidate_1125	1198063	1198115	-	A	52	138.849	0.0859512	0	1	0.862	0.0101032	1	AS to 5'/3' UTRs	3', Rv1074c	3', Rv1073	-19	-884
candidate_1126	1200510	1200605	-	A	95	526.438	1.14525	1	0	0.02	0.00105703	1	Intergenic			140	162
candidate_1127	1201750	1201788	-	A	38	255.897	0	0	0	0.094	0.897515	1	AS		Rv0177	-1361	-71
candidate_1128	1203251	1203286	-	A	35	149.667	0.138043	1	1	0.246	0.972919	1	AS to 5'/3' UTRs		5', Rv1078	140	27
candidate_1129	1203697	1203926	-	A	229	349.37	0	1	1	0.275	0.845279	1	AS		Rv1078	-338	-613
candidate_1130	1212564	1212615	-	A	51	269.788	0	1	0	0.6	1.32606e-06	0.00154353	AS		Rv1087	-1299	-1055
candidate_1131	1236708	1236758	-	A	50	78.0196	0	0	1	0.087	0.063567	1	AS		Rv1110	-484	-573
candidate_1132	1261346	1261422	-	A	76	189.779	0.117567	0	0	0.765	0.0105408	1	Within 5'/3' UTRs	5', Rv1133c		0	500
candidate_1133	1261487	1261524	-	A	37	172.737	3.29236	0	0	0.712	7.96205e-05	0.0879806	Intergenic			141	398
candidate_1134	1261558	1261601	-	A	43	288.523	2.29857	0	0	0.213	6.55193e-12	8.25543e-09	Intergenic			212	321
candidate_1135	1267302	1267344	-	A	42	312.814	0.101521	1	0	0.731	0.979784	1	AS to 5'/3' UTRs		5', Rv1140	317	3
candidate_1136	1272135	1272167	-	A	32	73.2121	0.908918	1	1	0.503	0.00271024	1	Intergenic			227	256
candidate_1137	1275611	1275673	-	A	62	1042.76	0.103959	1	1	0.001	0	0	AS to 5'/3' UTRs		3', Rv1147	61	627
candidate_1138	1276267	1276300	-	A	33	117.353	0.0955491	0	0	0.149	0.974813	1	Within 5'/3' UTRs	3', Rv1148c		717	0
candidate_1139	1282030	1282128	-	A	98	178.576	0.135296	1	1	0.86	5.33723e-08	6.39934e-05	AS		Rv4012	158	178
candidate_1140	1287000	1287039	-	A	39	121.15	0.0655703	1	1	0.008	0.922264	1	AS to 5'/3' UTRs		3', Rv1160	-20	-444
candidate_1141	1290289	1290381	-	A	92	228.333	0	1	0	0.354	7.62393e-05	0.0843969	AS		Rv1161	-737	-3053
candidate_1142	1291823	1292095	-	A	272	633.015	0	1	0	0.685	0.0017735	1	AS		Rv1162	-918	-1030
candidate_1143	1300145	1300223	-	A	78	403.962	0.138043	1	0	0.331	0	0	Within 5'/3' UTRs	5', Rv1169c		21	81
candidate_1144	1301276	1301316	-	A	40	254	2.90008	0	0	0.398	0.033268	1	AS to 5'/3' UTRs		3', Rv1170; 5', Rv1171	-471	-9
candidate_1145	1302855	1302894	-	A	39	190.025	0.138043	1	0	0.433	0.00131825	1	AS to 5'/3' UTRs		5', Rv1173	174	37
candidate_1146	1303163	1303215	-	A	52	275.736	0	0	0	0.904	0.916751	1	AS		Rv1173	-2338	-284
candidate_1147	1303572	1303742	-	A	170	613.696	0	1	0	0.909	6.15064e-14	7.90972e-11	AS		Rv1173	-1929	-811
candidate_1148	1304940	1304971	-	A	31	114.531	0	0	0	0.571	0.926581	1	AS		Rv1173	-561	-2040
candidate_1149	1306038	1306073	-	A	35	96.4167	1.34004	1	0	0.09	0	0	Within 5'/3' UTRs	5', Rv1174c		37	129
candidate_1150	1308905	1309232	-	A	327	515.39	0.085809	0	0	0.965	0.805268	1	AS to 5'/3' UTRs		5', Rv1177	-426	-227
candidate_1151	1313343	1313400	-	A	57	5034.5	1.37187	0	0	0.001	0	0	Within 5'/3' UTRs	5', Rv1179c		44	325
candidate_1152	1316604	1316664	-	A	60	235.279	0	1	1	0.818	0.557987	1	AS		Rv1181	-3378	-1430
candidate_1153	1320736	1320766	-	A	30	1368.77	0	1	0	0.682	0.997803	1	AS		Rv1182	-717	-731
candidate_1154	1321021	1321259	-	A	238	559.481	0	1	1	0.141	0.526755	1	AS		Rv1182	-432	-1224
candidate_1155	1321807	1321893	-	A	86	147.264	0	0	0	0.916	0.999903	1	AS		Rv1183	-2721	-373
candidate_1156	1325649	1325686	-	A	37	205.684	0.138043	1	0	0.902	2.22876e-11	2.79263e-08	Within 5'/3' UTRs	5', Rv1184c		38	90
candidate_1157	1338887	1338938	-	A	51	226.923	0.138043	1	0	0.319	0.840915	1	AS to 5'/3' UTRs		5', Rv1195	374	65
candidate_1158	1340450	1340508	-	A	58	393.61	0	0	1	0.224	0	0	AS		Rv1196	-74	-1159
candidate_1159	1342738	1342771	-	A	33	77.2353	0.138043	0	0	0.343	0.708733	1	Intergenic			133	171
candidate_1160	1342872	1342965	-	A	93	206.479	0.101329	1	0	0.001	0	0	AS to 5'/3' UTRs		5', Rv1200	-1347	-23
candidate_1161	1348918	1348957	-	A	39	708.925	0	0	0	0.646	3.02894e-05	0.0340453	AS		Rv1205	-364	-238
candidate_1162	1349067	1349112	-	A	45	102.674	0	1	1	0.851	0.200831	1	AS		Rv1205	-215	-393
candidate_1163	1364462	1364558	-	A	96	178.639	0	0	0	0.332	0.851406	1	AS		Rv1221	-724	-145
candidate_1164	1364663	1364702	-	A	39	119.2	0	0	0	0.395	0.793842	1	AS		Rv1221	-523	-289
candidate_1165	1366900	1366939	-	A	39	122.625	0	0	1	0.643	0.165919	1	AS		Rv1223	-561	-1064
candidate_1166	1371123	1371170	-	A	47	98.875	0	0	1	0.641	0.475834	1	AS		Rv1228	-354	-250
candidate_1167	1394442	1394472	-	A	30	119.774	0	0	0	0.784	0.852021	1	AS		Rv1250	-1476	-293
candidate_1168	1400285	1400317	-	A	32	132.455	0	0	0	0.578	0.719089	1	AS		Rv1253	-1376	-347
candidate_1169	1413174	1413224	-	A	50	2013.59	1.18297	1	0	0.408	0	0	AS to 5'/3' UTRs		5', Rv1265	87	36
candidate_1170	1424784	1424836	-	A	52	261.66	0	1	0	0.91	0.654979	1	AS		Rv1275	-509	-85
candidate_1171	1439891	1440077	-	A	186	361.658	0	1	1	0.738	2.4322e-07	0.000287729	AS		Rv1286	-860	-1170
candidate_1172	1454141	1454172	-	A	31	124.812	0	0	0	0.206	0.508257	1	AS		Rv1297	-871	-968
candidate_1173	1455156	1455285	-	A	129	259.631	0.00637121	0	0	0.968	0.999714	1	AS to 5'/3' UTRs		5', Rv1298	-249	-122
candidate_1174	1459894	1459935	-	A	41	95.8333	0	0	0	1	0.995933	1	AS		Rv1303	-357	-169
candidate_1175	1459996	1460036	-	A	40	209.366	0	0	0	0.704	0.280967	1	AS		Rv1303	-255	-270
candidate_1176	1460757	1460797	-	A	40	183.854	0	0	1	0.891	5.08399e-12	6.42616e-09	AS		Rv1304	-239	-553
candidate_1177	1460892	1461010	-	A	118	194.849	0.0128819	1	0	0.388	0.983845	1	AS to 5'/3' UTRs		3', Rv1304	-104	-766
candidate_1178	1463190	1463220	-	A	30	99.871	0.509304	1	0	0.318	1.02468e-12	1.30749e-09	AS to 5'/3' UTRs		3', Rv1307; 5', Rv1308	7	8
candidate_1179	1464709	1464761	-	A	52	168.509	0	0	1	0.752	0.147549	1	AS		Rv1308	-168	-1533
candidate_1180	1465247	1465345	-	A	98	634.848	0	1	0	0.858	0.000120232	0.132256	AS		Rv1309	-554	-461
candidate_1181	1465725	1465777	-	A	52	150.717	0	1	1	0.734	0.00103571	1	AS		Rv1309	-76	-893
candidate_1182	1466855	1467111	-	A	256	492.965	0	0	1	0.675	0.0105248	1	AS		Rv1310	-446	-1270
candidate_1183	1471657	1471729	-	A	72	3592.34	3.32583	0	0	0.369	0.993818	1	Intergenic			80	117
candidate_1184	1471814	1471995	-	A	181	716.742	0.0235128	0	0	0.837	0.865163	1	AS to 5'/3' UTRs		5', Rvnr01	-1568	-149
candidate_1186	1473115	1473350	-	A	235	186.597	0	1	0	0.565	0.943109	1	AS		Rvnr01	-267	-1504
candidate_1187	1473503	1473928	-	A	425	274.012	1.08713	1	0	0.033	0.999994	1	AS to 5'/3' UTRs		5', Rvnr02	-3292	-270
candidate_1188	1473967	1474360	-	A	393	327.056	0	1	0	0.811	0.000264999	0	AS		Rvnr02	-2828	-702
candidate_1189	1474520	1474904	-	A	384	178.714	0	1	1	0.099	0.99888	1	AS		Rvnr02	-2275	-1246
candidate_1190	1475067	1475610	-	A	543	216.16	0	0	0	0.331	0.129904	1	AS		Rvnr02	-1728	-1952
candidate_1191	1475646	1476149	-	A	503	198.563	0	1	0	0.168	0.999947	1	AS		Rvnr02	-1149	-2491
candidate_1192	1476171	1476699	-	A	528	197.681	0	0	0	0.028	1	1	AS		Rvnr02	-624	-3041
candidate_1193	1476719	1476794	-	A	75	149.829	0	1	0	0.397	1	1	AS		Rvnr02	-76	-3136
candidate_1194	1476976	1477014	-	A	38	275.154	0.00353956	1	0	0.785	7.76267e-05	0.0858551	AS to 5'/3' UTRs		3', Rvnr03	-37	-115
candidate_1195	1484240	1484314	-	A	74	439.507	0.141461	0	0	0.646	0.89675	1	AS to 5'/3' UTRs	5', Rv1320c	5', Rv1321	-719	-35
candidate_1196	1485130	1485162	-	A	32	135.545	0	0	1	0.692	0.984501	1	AS		Rv1322	-148	-180
candidate_1197	1485244	1485283	-	A	39	234.2	0.0172554	0	0	0.059	0.000170515	0.186031	AS to 5'/3' UTRs	3', Rv1322A	3', Rv1322	-34	-301
candidate_1198	1486759	1486919	-	A	160	430.509	0	1	1	0.698	1.93428e-08	2.33274e-05	AS		Rv1323	-272	-1057
candidate_1199	1488098	1488132	-	A	34	207.343	1.64896	0	0	0.001	0.940131	1	AS to 5'/3' UTRs	3', Rv1325c	3', Rv1324	23	22
candidate_1200	1500780	1500810	-	A	30	126.097	0	0	1	0.501	0.999625	1	AS		Rv1331	-186	-149
candidate_1201	1502632	1502669	-	A	37	128.553	0	0	0	0.551	0.921152	1	AS to 5'/3' UTRs		3', Rv1333; 5', Rv1334	-449	-1070
candidate_1202	1502760	1502790	-	A	30	116.935	0	0	0	0.955	0.987774	1	AS		Rv1334	-321	-149
candidate_1203	1503051	1503090	-	A	39	187.7	0.028136	1	1	0.603	1.43566e-06	0.00166824	AS to 5'/3' UTRs		3', Rv1335; 5', Rv1334	-30	-449
candidate_1204	1518130	1518237	-	A	107	204.926	0	1	0	0.508	0.0461204	1	AS		Rv1350	-430	-746
candidate_1205	1535421	1535556	-	A	135	421.507	0.651948	1	0	0.655	0.158336	1	Within 5'/3' UTRs	5', Rv1363c		29	127
candidate_1206	1545827	1545862	-	A	35	92.3056	0	1	0	0.572	0.909364	1	AS		Rv1372	-179	-1037
candidate_1207	1548720	1548760	-	A	40	71.0488	0	1	0	0.045	0.787218	1	AS		Rv1375	-431	-928
candidate_1208	1557160	1557195	-	A	35	214.722	0	0	0	0.929	0.00402036	1	AS		Rv1384	-3288	-94
candidate_1209	1557439	1557473	-	A	34	240.343	0	0	1	0.113	0.389263	1	AS		Rv1384	-3009	-372
candidate_1210	1557540	1557597	-	A	57	244.379	0	0	0	0.644	0.545045	1	AS		Rv1384	-2908	-496
candidate_1211	1559620	1559658	-	A	38	101.923	0	0	1	0.223	0.606504	1	AS		Rv1384	-828	-2557
candidate_1212	1561384	1561627	-	A	243	783.217	0.0446942	1	1	0.091	0.0834817	1	AS to 5'/3' UTRs		5', Rv1386	-388	-163
candidate_1213	1565023	1565069	-	A	46	197.851	0.0907209	0	1	0.739	0.980411	1	AS to 5'/3' UTRs		3', Rv1389; 5', Rv1390	-4	-668
candidate_1214	1568060	1568093	-	A	33	160.147	1.62312	0	0	0.001	1	1	AS to 5'/3' UTRs	3', Rv1393c	3', Rv1392	24	16
candidate_1215	1573865	1574028	-	A	163	345.799	0.135825	0	0	0.472	0.963783	1	Within 5'/3' UTRs	5', Rv1396c		8	84
candidate_1216	1596860	1596924	-	A	64	128.292	0	1	1	0.765	0.970556	1	AS		Rv1421; Rv1422	-1049	-945
candidate_1217	1613697	1613742	-	A	45	376.804	0	0	0	0.474	0.0365575	1	AS		Rv1436	-629	-435
candidate_1218	1613994	1614032	-	A	38	112.795	0	1	1	0.643	0.767403	1	AS		Rv1436	-332	-725
candidate_1219	1615032	1615110	-	A	78	176.139	0	1	1	0.916	0.986983	1	AS		Rv1437	-535	-781
candidate_1220	1635442	1635486	-	A	44	83.4222	0	0	1	0.401	0.997137	1	AS		Rv1451	-513	-457
candidate_1221	1639615	1639645	-	A	30	146.387	0	0	0	0.148	0.999576	1	AS	3', Rv1454c	3', Rv1453	-31	-1264
candidate_1222	1658946	1659019	-	A	73	250.676	0.0615596	0	1	0.973	0.910394	1	AS to 5'/3' UTRs		3', Rv1469; 5', Rv1470	-408	-39
candidate_1223	1671243	1671282	-	A	39	105.025	0	1	0	0.45	0.694112	1	AS		Rv1480	-123	-869
candidate_1224	1678541	1678598	-	A	57	212.948	0	0	0	0.117	0.204703	1	AS to 5'/3' UTRs		3', Rv1488; 5', Rv1489	-367	-1201
candidate_1225	1690809	1690868	-	A	59	2419.83	0.0920285	1	1	0.236	0.191846	1	AS to 5'/3' UTRs		3', Rv1499; 5', Rv1500	-1069	-18
candidate_1226	1691821	1691873	-	A	52	153.925	0	1	0	0.444	0.167668	1	AS		Rv1500	-57	-1023
candidate_1227	1692027	1692065	-	A	38	113.436	0	0	0	0.349	0.986785	1	AS		Rv1501	-684	-175
candidate_1228	1692179	1692210	-	A	31	91.125	0	0	0	0.007	0.99861	1	AS		Rv1501	-532	-320
candidate_1229	1692421	1692459	-	A	38	125.667	0	1	0	0.601	0.969645	1	AS		Rv1501	-290	-569
candidate_1230	1709535	1709587	-	A	52	641.774	0	0	1	0.1	0.390954	1	AS		Rv1517	-100	-716
candidate_1231	1712868	1712921	-	A	53	220.204	0	0	0	0.644	0.879755	1	AS		Rv1521	-1185	-619
candidate_1232	1713274	1713308	-	A	34	96.6857	0	1	0	0.791	0.999687	1	AS		Rv1521	-779	-1006
candidate_1233	1713589	1713732	-	A	143	441.819	0	1	0	0.963	0.622804	1	AS		Rv1521	-464	-1430
candidate_1234	1735880	1735999	-	A	119	203.633	0.271643	1	0	0.507	0.181103	1	AS to 5'/3' UTRs		5', Rv1535	-332	-23
candidate_1235	1738164	1738200	-	A	36	148.568	0	1	0	0.491	0.993422	1	AS		Rv1536	-1480	-1681
candidate_1236	1738501	1738533	-	A	32	106.333	0	0	0	0.151	0.9641	1	AS		Rv1536	-1143	-2014
candidate_1237	1738570	1738789	-	A	219	177.059	0	1	0	0.328	0.997733	1	AS		Rv1536	-1074	-2270
candidate_1238	1745704	1745814	-	A	110	257.198	0	0	1	0.361	0.110299	1	AS		Rv1543	-385	-750
candidate_1239	1746074	1746105	-	A	31	306.656	0	0	0	0.602	0.999223	1	AS to 5'/3' UTRs		3', Rv1543; 5', Rv1544	-823	-1041
candidate_1240	1749761	1749889	-	A	128	494.612	0	1	1	0.878	0.833059	1	AS		Rv1547	-1487	-2195
candidate_1241	1763507	1763541	-	A	34	136.4	0	1	0	0.654	0.0962608	1	AS		Rv1559	-1210	-113
candidate_1242	1773841	1773873	-	A	32	365.97	0.138043	0	1	0.063	0.79427	1	Within 5'/3' UTRs	3', Rv1566c; 5', Rv1565c		12	55
candidate_1243	1774658	1774704	-	A	46	116.553	0.111739	1	0	0.054	0	0	Within 5'/3' UTRs	5', Rv1566c		38	156
candidate_1244	1793745	1793895	-	A	150	533.285	0.132722	1	0	0.764	3.43706e-06	0.00395605	Within 5'/3' UTRs	5', Rv1592c		5	102
candidate_1245	1794985	1795134	-	A	149	137.84	0	0	0	0.879	0.903985	1	AS		Rv1594	-820	-378
candidate_1246	1797023	1797120	-	A	97	176.296	0	1	1	0.847	7.68771e-07	0.000899463	AS		Rv1595	-365	-1315
candidate_1247	1802446	1802479	-	A	33	344.471	0	0	1	0.404	0.894989	1	AS		Rv1601	-221	-444
candidate_1248	1803228	1803281	-	A	53	210.019	0	1	1	0.23	0.53585	1	AS		Rv1602	-56	-617
candidate_1249	1807992	1808023	-	A	31	107.188	0	0	0	0.001	0.568979	1	AS		Rv1609	-1461	-120
candidate_1250	1809246	1809291	-	A	45	182.891	0	0	1	0.663	1.24771e-05	0.0141366	AS		Rv1609	-207	-1388
candidate_1251	1824400	1824430	-	A	30	580.032	0.124684	0	0	0.632	0.200167	1	Within 5'/3' UTRs	3', Rv1623c; 5', Rv1622c		0	0
candidate_1252	1825887	1825928	-	A	41	217.524	0.276514	1	0	0.551	0.804862	1	Within 5'/3' UTRs	3', Rv1624c; 5', Rv1623c		0	70
candidate_1253	1828427	1828585	-	A	158	224.044	0	1	1	0.099	0.776896	1	AS		Rv1626	-370	-405
candidate_1254	1828812	1828848	-	A	36	190.027	1.38224	0	0	0.001	0.0783472	1	AS to 5'/3' UTRs	3', Rv1627c	3', Rv1626	15	17
candidate_1255	1830727	1830905	-	A	178	310.905	0	1	0	0.516	0	0	AS		Rv1629	-2652	-240
candidate_1256	1833488	1833560	-	A	72	1603.66	1.81882	0	0	0.094	5.63721e-05	0.0629113	AS to 5'/3' UTRs		5', Rv1630	-1499	-18
candidate_1257	1834234	1834264	-	A	30	106.903	0	0	0	0.661	0.993547	1	AS		Rv1630	-753	-722
candidate_1258	1834321	1834370	-	A	49	397.64	0	0	0	0.615	0.98084	1	AS		Rv1630	-666	-828
candidate_1259	1834629	1834673	-	A	44	158.756	0	0	0	0.255	0.983961	1	AS		Rv1630	-358	-1131
candidate_1260	1837307	1837404	-	A	97	477.367	0	1	1	0.672	0.0337673	1	AS		Rv1633	-1864	-329
candidate_1261	1846376	1846440	-	A	64	223.723	0	1	0	0.915	0.23452	1	AS		Rv1638	-283	-2699
candidate_1262	1852862	1852903	-	A	41	116.833	0.0821683	1	1	0.256	1.88992e-09	2.30759e-06	AS to 5'/3' UTRs		3', Rv1641; 5', Rv1642	-16	-630
candidate_1263	1853081	1853121	-	A	40	230.024	0	1	0	0.531	0.272009	1	AS		Rv1642	-41	-193
candidate_1264	1853155	1853192	-	A	37	175.711	0.593067	0	0	0.829	0.272557	1	AS to 5'/3' UTRs		3', Rv1642; 5', Rv1643	-418	-8
candidate_1265	1859616	1859646	-	A	30	77.9677	0	0	0	0.25	0.999339	1	AS		Rv1649	-142	-913
candidate_1266	1859685	1859742	-	A	57	127.621	0	1	0	0.198	0.960515	1	AS		Rv1649	-73	-1009
candidate_1267	1901637	1901668	-	A	31	138.656	0	0	0	0.868	0.98546	1	AS		Rv1676	-114	-621
candidate_1268	1901737	1901786	-	A	49	231.12	0	1	0	0.865	0.00955388	1	AS		Rv1676; Rv1677	-559	-739
candidate_1269	1915013	1915164	-	A	151	570.48	0.138043	0	0	0.005	0.962905	1	Intergenic			137	363
candidate_1270	1923833	1923863	-	A	30	146.839	0	0	0	0.408	0.884507	1	AS		Rv1699	-1756	-34
candidate_1271	1925143	1925186	-	A	43	259.75	0	1	0	0.901	0.972426	1	AS		Rv1699	-446	-1357
candidate_1272	1925299	1925349	-	A	50	300.216	0	0	0	0.76	0.927551	1	AS		Rv1699	-290	-1520
candidate_1273	1925454	1925495	-	A	41	245.69	0	1	0	0.222	0.943709	1	AS		Rv1699	-135	-1666
candidate_1274	1960714	1960774	-	A	60	2126.07	0.0981924	0	0	0.136	0.963902	1	Within 5'/3' UTRs	3', Rv1734c		227	0
candidate_1275	1962178	1962208	-	A	30	84.9677	0.138043	0	0	0.666	0.671695	1	Within 5'/3' UTRs	3', Rv1736c		390	20
candidate_1276	1965811	1965955	-	A	144	154.966	0	0	0	0.479	0.999999	1	AS	3', Rv1739c	Rv1738	-130	-298
candidate_1277	1975495	1975528	-	A	33	77.0882	0	0	1	0.374	0.986594	1	AS		Rv1747	-732	-1898
candidate_1278	1975717	1975757	-	A	40	164.39	0	0	1	0.193	0.976456	1	AS		Rv1747	-510	-2127
candidate_1279	1999706	1999747	-	A	41	604.619	0.137193	1	0	0.859	0.00146919	1	AS to 5'/3' UTRs		5', Rv1766	-300	-10
candidate_1280	2012032	2012070	-	A	38	131.436	0.138043	0	0	0.759	0.846004	1	AS to 5'/3' UTRs	3', Rv1778c	3', Rv1777	72	11
candidate_1281	2015075	2015235	-	A	160	394.366	0	1	1	0.812	0.000823902	0.87828	AS		Rv1780	-187	-536
candidate_1282	2019220	2019251	-	A	31	199.562	0	0	1	0.711	0.928792	1	AS		Rv1782	-40	-1511
candidate_1283	2021327	2021476	-	A	149	176.5	0	1	0	0.852	0.218448	1	AS		Rv1784	-2105	-842
candidate_1284	2023086	2023118	-	A	32	442.758	0	0	1	0.709	0.998101	1	AS		Rv1784	-346	-2484
candidate_1285	2023361	2023447	-	A	86	202.448	0	0	0	0.133	4.03206e-06	0.0046288	AS	3', Rv1785c	Rv1784	-71	-2813
candidate_1286	2029826	2029932	-	A	106	483.28	0.0883931	1	0	0.439	0.999724	1	AS to 5'/3' UTRs		5', Rv1791	-377	-28
candidate_1287	2030122	2030163	-	A	41	96.5714	0	0	1	0.327	0.999122	1	AS		Rv1791	-81	-259
candidate_1288	2030225	2030259	-	A	34	661.2	0.138043	0	0	0.398	0.977703	1	AS to 5'/3' UTRs		3', Rv1791	22	88
candidate_1289	2030623	2030680	-	A	57	1622.26	0.549947	1	0	0.412	0.537147	1	AS to 5'/3' UTRs		3', Rv1792; 5', Rv1793	-20	-333
candidate_1290	2030978	2031068	-	A	90	963.56	1.10905	1	0	0.03	0.0131491	1	AS to 5'/3' UTRs		3', Rv1793; 5', Rv1794	-990	-2
candidate_1291	2031467	2031523	-	A	56	235.807	0	0	0	0.597	0.971984	1	AS		Rv1794	-501	-457
candidate_1292	2031572	2031646	-	A	74	207.28	0	0	1	0.89	0.757225	1	AS		Rv1794	-396	-580
candidate_1293	2031872	2031955	-	A	83	124.06	0	1	0	0.697	0.0311321	1	AS		Rv1794	-96	-889
candidate_1294	2033915	2033951	-	A	36	96	0	1	1	0.692	0.973224	1	AS		Rv1796	-1571	-222
candidate_1295	2035527	2035565	-	A	38	179.872	0	0	0	0.552	0.982844	1	AS		Rv1797	-1176	-82
candidate_1296	2039818	2039874	-	A	56	274.053	0	1	0	0.45	0.866527	1	AS		Rv1800	-1602	-421
candidate_1297	2048363	2048406	-	A	43	397.364	0.0247298	1	1	0.828	0.764261	1	AS to 5'/3' UTRs		3', Rv1806; 5', Rv1807	-1234	-334
candidate_1298	2052639	2052686	-	A	47	111.958	0	0	1	0.233	0.256513	1	AS		Rv1809	-49	-1404
candidate_1299	2052783	2052821	-	A	38	102.821	0.138043	0	0	0.549	0.999768	1	Intergenic			95	112
candidate_1300	2052885	2052941	-	A	56	180.86	0.0837103	1	0	0.044	0.996426	1	AS to 5'/3' UTRs		5', Rv1810	-404	-8
candidate_1301	2055359	2055441	-	A	82	184.47	0.13638	1	0	0.865	0.936014	1	Within 5'/3' UTRs	5', Rv1812c		0	240
candidate_1302	2055586	2055616	-	A	30	682.355	0.138043	1	0	0.684	0.856247	1	Within 5'/3' UTRs	3', Rv1813c		227	65
candidate_1303	2056112	2056330	-	A	218	306.616	0.137412	1	1	0.981	4.31322e-14	5.55974e-11	Within 5'/3' UTRs	5', Rv1813c		0	191
candidate_1304	2067593	2067709	-	A	116	285.051	0	0	1	0.577	0.999921	1	AS		Rv1821	-1290	-1252
candidate_1305	2070245	2070299	-	A	54	154.436	0	0	1	0.963	0.977367	1	AS		Rv1823	-380	-597
candidate_1306	2072356	2072518	-	A	162	563.926	0.246764	1	0	0.761	0.529427	1	AS to 5'/3' UTRs		3', Rv1826; 5', Rv1827	0	78
candidate_1307	2074924	2074963	-	A	39	193.725	0	0	0	0.958	0.00527744	1	AS		Rv1830	-594	-122
candidate_1308	2075183	2075213	-	A	30	159.581	0	0	0	0.056	0.999292	1	AS		Rv1830	-335	-372
candidate_1309	2077860	2077947	-	A	87	123.386	0	1	0	0.095	2.07213e-08	2.49691e-05	AS		Rv1832	-842	-2070
candidate_1310	2096873	2097124	-	A	251	421.825	0.00164337	1	0	0.673	0.00071807	0.767617	AS		Rv1847	-426	-247
candidate_1311	2123782	2123879	-	A	97	126.643	0	1	1	0.714	0.369179	1	AS		Rv1874	-588	-195
candidate_1312	2125225	2125290	-	A	65	350.318	0.138043	0	1	0.619	1.74667e-05	0.0197549	AS to 5'/3' UTRs		5', Rv1876	401	50
candidate_1313	2135867	2135906	-	A	39	1094.8	0.310859	1	1	0.999	0	0	Within 5'/3' UTRs	5', Rv1886c		0	352
candidate_1314	2136126	2136173	-	A	47	1070.38	0.500679	0	0	0.209	2.04147e-06	0.00235994	Intergenic			259	85
candidate_1315	2136209	2136281	-	A	72	2470.6	0.0832634	0	0	0.803	0.853436	1	AS to 5'/3' UTRs		5', Rv1887	-1191	-23
candidate_1316	2136948	2136984	-	A	36	555.378	0	0	0	0.286	0.71485	1	AS		Rv1887	-452	-726
candidate_1317	2137034	2137087	-	A	53	364.407	0	1	1	0.48	3.69854e-09	4.49373e-06	AS		Rv1887	-366	-829
candidate_1318	2148308	2148353	-	A	45	119.783	0	0	1	0.029	0.00330985	1	AS		Rv1901	-646	-691
candidate_1319	2158003	2158033	-	A	30	83.5806	0.138043	1	0	0.485	0.994729	1	Within 5'/3' UTRs	3', Rv1912c; 5', Rv1911c		16	54
candidate_1320	2159104	2159136	-	A	32	626.97	0.138043	0	0	0.181	0.341346	1	AS to 5'/3' UTRs	5', Rv1912c	5', Rv1913	13	55
candidate_1321	2161142	2161176	-	A	34	82.2286	0	0	1	0.02	0.989939	1	AS		Rv1915	-424	-713
candidate_1322	2171657	2171733	-	A	76	846.649	0	0	0	0.942	0.79828	1	AS		Rv1920	-829	-110
candidate_1323	2175985	2176017	-	A	32	76.4242	0	1	0	0.621	0.684328	1	AS		Rv1923	-528	-844
candidate_1324	2177083	2177160	-	A	77	509.359	0.00530934	0	0	0.061	0.218908	1	AS to 5'/3' UTRs		5', Rv1925	-1866	-73
candidate_1325	2177632	2177678	-	A	46	82.1277	0	0	1	0.921	0.984516	1	AS		Rv1925	-1317	-591
candidate_1326	2179436	2179470	-	A	34	201.8	0.134099	1	1	0.354	7.48979e-07	0.000877054	Within 5'/3' UTRs	5', Rv1928c		0	203
candidate_1327	2183393	2183425	-	A	32	152.879	0	0	0	0.918	0.972909	1	AS		Rv1932	-476	-53
candidate_1328	2202859	2202915	-	A	56	102.649	0	1	0	0.906	0.170494	1	AS		Rv1957	-270	-331
candidate_1329	2223172	2223214	-	A	42	295.279	0.114001	1	0	0.243	0.27477	1	Within 5'/3' UTRs	5', Rv1979c		8	129
candidate_1330	2225248	2225314	-	A	66	185.343	0.114001	1	0	0.688	0	0	Within 5'/3' UTRs	5', Rv1981c		60	99
candidate_1331*	2225922	2225956	-	A	34	103.743	0.0553123	0	0	0.984	0.9986	1	to be excluded - intergenic			90	288
candidate_1332	2227175	2227206	-	A	31	144.594	0	0	1	0.911	0.986805	1	AS		Rv1983	-745	-962
candidate_1333	2232674	2232719	-	A	45	388.391	0.138043	0	1	0.899	0.997034	1	Within 5'/3' UTRs	3', Rv1989c		455	20
candidate_1334	2237577	2237611	-	A	34	64.7714	0.138043	0	0	0.64	0.975834	1	Within 5'/3' UTRs	3', Rv1994c; 5', Rv1993c		2	17
candidate_1335	2242269	2242307	-	A	38	137.949	0	0	1	0.592	0.988563	1	AS		Rv1997	-607	-2148
candidate_1336	2252327	2252429	-	A	102	185.456	0	1	0	0.286	0.884339	1	AS		Rv2006	-3658	-427
candidate_1337	2253965	2254133	-	A	168	239.485	0	1	0	0.153	1.83458e-06	0.00212445	AS		Rv2006	-2020	-2131
candidate_1338	2255553	2255605	-	A	52	169.434	0	0	1	0.884	0.995236	1	AS		Rv2006	-432	-3603
candidate_1339	2255798	2255833	-	A	35	118.722	0	0	0	0.53	0.999937	1	AS		Rv2006	-187	-3831
candidate_1340	2255938	2256018	-	A	80	171.296	0.0562397	0	1	0.976	0.988381	1	AS to 5'/3' UTRs	3', Rv2007c	3', Rv2006	-47	-4016
candidate_1341	2268166	2268230	-	A	64	395.246	0.116692	0	0	0.001	0.955801	1	Within 5'/3' UTRs	3', Rv2023A; 5', Rv2023c		58	38
candidate_1342	2279389	2279419	-	A	30	307.323	0	0	0	0.261	0.928128	1	AS		Rv2032	-735	-290
candidate_1343	2282408	2282443	-	A	35	107.556	0	1	0	0.624	0.0399259	1	AS		Rv2036	-332	-344
candidate_1344	2307692	2307772	-	A	80	361.284	0.249683	1	1	0.583	1.59924e-10	1.97826e-07	AS to 5'/3' UTRs		5', Rv2050	175	49
candidate_1345	2308093	2308123	-	A	30	324.129	0	0	1	0.45	0.999617	1	AS	3', Rv2051c	Rv2050	-63	-302
candidate_1346	2313215	2313256	-	A	41	171.5	0	1	0	0.081	0.999997	1	AS		Rv2054	-623	-131
candidate_1347	2337529	2337559	-	A	30	237.419	0	0	0	0.556	0.878175	1	AS		Rv2080	-340	-253
candidate_1348	2337642	2337778	-	A	136	342.891	0	0	1	0.651	9.97345e-11	1.2387e-07	AS		Rv2080	-227	-472
candidate_1349	2337828	2337996	-	A	168	346.456	0.0580903	1	0	0.273	9.73904e-06	0.0110538	AS to 5'/3' UTRs	3', Rv2081c	3', Rv2080	-41	-690
candidate_1350	2338505	2338641	-	A	136	394.467	0.132644	0	0	0.329	0.99727	1	AS to 5'/3' UTRs	5', Rv2081c	5', Rv2082c	0	68
candidate_1351	2340303	2340339	-	A	36	87.2162	0	0	1	0.327	0.115163	1	AS		Rv2082	-571	-1630
candidate_1352	2340717	2340752	-	A	35	127.972	0	0	0	0.83	1.97547e-09	2.41007e-06	AS		Rv2082	-157	-2043
candidate_1353	2368226	2368442	-	A	216	483.166	0	1	0	0.659	0.999635	1	AS		Rv2108	-216	-731
candidate_1354	2374202	2374380	-	A	178	221.324	0	1	0	0.313	0	0	AS		Rv2114	-255	-546
candidate_1355	2390078	2390135	-	A	57	179.621	0	1	0	0.564	7.12709e-05	0.0791107	AS		Rv2127; Rv2128	-210	-1519
candidate_1356	2402044	2402077	-	A	33	413.059	0.0186212	0	0	0.103	0.775769	1	AS		Rvnt22	-28	-90
candidate_1357	2402677	2402721	-	A	44	599.578	0.0793541	1	0	0.779	0.000962346	1	Intergenic			167	256
candidate_1358	2405437	2405545	-	A	108	409.385	3.20812	1	0	0.087	0.0110401	1	Within 5'/3' UTRs	5', Rv2145c		39	121
candidate_1359*	2429342	2429373	-	A	31	292.438	3.84924	0	0	0.274	2.15158e-08	2.59051e-05	to be excluded - within 3'/5' UTRs			73	54
candidate_1360	2431969	2432014	-	A	45	231.913	1.7334	1	0	0.35	2.85327e-14	3.68072e-11	Within 5'/3' UTRs	5', Rv2169c		0	221
candidate_1361	2432046	2432081	-	A	35	286.528	3.69134	1	0	0.245	0.398005	1	Within 5'/3' UTRs	5', Rv2169c		77	154
candidate_1362	2433415	2433451	-	A	36	125.622	0	0	0	0.145	0.300349	1	AS		Rv2171	-219	-500
candidate_1363	2438264	2438298	-	A	34	201.086	0	0	0	0.641	0.578855	1	AS		Rv2176	-876	-357
candidate_1364	2438344	2438376	-	A	32	147	0	0	0	0.904	0.00252567	1	AS		Rv2176	-796	-435
candidate_1365	2445329	2445380	-	A	51	106.558	1.27938	1	0	0.238	0.0925036	1	Within 5'/3' UTRs	3', Rv2183c; 5', Rv2182c		0	35
candidate_1366	2447524	2447567	-	A	43	527.023	0.138043	1	0	0.49	0.421891	1	Within 5'/3' UTRs	3', Rv2186c; 5', Rv2185c		24	38
candidate_1367	2449353	2449385	-	A	32	110.758	0	1	1	0.641	0.124886	1	AS		Rv2187	-609	-1225
candidate_1368	2453327	2453422	-	A	95	113.604	1.34828	1	0	0.112	0.996233	1	Within 5'/3' UTRs	5', Rv2190c		55	397
candidate_1369	2456897	2456932	-	A	35	139.583	0.222798	0	0	0.541	0.995425	1	AS to 5'/3' UTRs		5', Rv2193	-615	-31
candidate_1370	2457001	2457040	-	A	39	124.225	0	0	0	0.738	0.902354	1	AS		Rv2193	-511	-139
candidate_1371	2457107	2457255	-	A	148	207.799	0	0	0	0.692	0.0734717	1	AS		Rv2193	-405	-354
candidate_1372	2457333	2457366	-	A	33	69.6176	0	1	0	0.759	0.994082	1	AS		Rv2193	-179	-465
candidate_1373	2457428	2457485	-	A	57	192.155	0	0	0	0.484	0.153964	1	AS		Rv2193	-84	-584
candidate_1374	2458151	2458207	-	A	56	98.8596	0	0	1	0.453	0.000162742	0.17804	AS		Rv2194	-244	-654
candidate_1375	2459073	2459352	-	A	279	198.132	0	0	0	0.256	0.00214495	1	AS		Rv2195	-608	-960
candidate_1376	2459819	2459850	-	A	31	101.281	0	0	0	0.856	0.999823	1	AS		Rv2196	-1508	-172
candidate_1377	2460105	2460321	-	A	216	413.889	0	1	0	0.983	0.363278	1	AS		Rv2196	-1222	-643
candidate_1378	2460774	2460812	-	A	38	131.949	0	0	0	0.777	0.625865	1	AS		Rv2196	-553	-1134
candidate_1379	2464768	2464830	-	A	62	226.111	0.643837	1	0	0.182	1.23412e-12	1.57104e-09	Within 5'/3' UTRs	5', Rv2200c		17	167
candidate_1380	2466977	2467012	-	A	35	1827.5	1.1754	0	1	0.022	0.000472287	0.508181	AS to 5'/3' UTRs	3', Rv2202c	3', Rv2201	22	41
candidate_1381	2468304	2468337	-	A	33	190.794	0	0	1	0.125	0.921539	1	AS		Rv2203	-619	-106
candidate_1382	2468435	2468491	-	A	56	178.561	0	1	1	0.247	0.0021131	1	AS		Rv2203	-488	-260
candidate_1383	2468730	2468775	-	A	45	71.7826	0	0	0	0.285	0.00182925	1	AS		Rv2203	-193	-544
candidate_1384	2468834	2468931	-	A	97	130.949	0	0	1	0.916	0.790165	1	AS	3', Rv2204c	Rv2203	-89	-700
candidate_1385	2469338	2469375	-	A	37	128.053	0.138043	0	0	0.758	8.66063e-09	1.0488e-05	Within 5'/3' UTRs	3', Rv2205c; 5', Rv2204c		51	12
candidate_1386	2471235	2471286	-	A	51	233.135	0	0	0	0.864	0.806619	1	AS		Rv2206	-97	-664
candidate_1387	2473276	2473357	-	A	81	337.524	0.138043	0	0	0.06	0.141472	1	AS to 5'/3' UTRs		3', Rv2208; 5', Rv2209	34	43
candidate_1388	2483068	2483134	-	A	66	122.373	0	1	1	0.559	0.860872	1	AS		Rv2215	-558	-1169
candidate_1389	2485009	2485093	-	A	84	149.106	0	0	0	0.522	0.02537	1	AS		Rv2217	-267	-509
candidate_1390	2486181	2486225	-	A	44	217.778	0.0521495	0	0	0.408	0.00126617	1	AS to 5'/3' UTRs		3', Rv2218; 5', Rv2219	-27	-952
candidate_1391	2488288	2488319	-	A	31	146	0	0	0	0.661	0.99998	1	AS		Rv2220	-763	-704
candidate_1392	2498149	2498371	-	A	222	442.516	0	1	1	0.175	8.4569e-12	1.06472e-08	AS		Rv2225	-438	-629
candidate_1393	2500381	2500411	-	A	30	1754.58	2.81889	1	1	0.146	9.22595e-14	1.18277e-10	AS to 5'/3' UTRs	3', Rvns01	3', Rv226	8	34
candidate_1394	2510157	2510218	-	A	61	230.919	0	0	0	0.751	0.0411432	1	AS		Rv2237	-99	-729
candidate_1395*	2510336	2510392	-	A	56	100.842	0.0937689	0	0	0.573	2.27052e-11	2.84269e-08	to be excluded - within 3'/5' UTRs			80	206
candidate_1396	2513682	2513725	-	A	43	88.5227	0	1	1	0.129	5.45341e-05	0.0609691	AS		Rv2241	-1562	-1186
candidate_1397	2517497	2517783	-	A	286	684.418	0.239197	0	1	0.04	0.0284287	1	AS to 5'/3' UTRs		3', Rv2243; 5', Rv2244	-621	-996
candidate_1398	2519682	2519714	-	A	32	181.091	0	0	0	0.245	0.923324	1	AS		Rv2246	-1030	-318
candidate_1399	2519792	2519827	-	A	35	207.361	0	1	1	0.364	0.943828	1	AS		Rv2246	-920	-431
candidate_1400	2529896	2529953	-	A	57	85.8103	1.87278	0	0	0.241	5.07427e-13	6.49507e-10	Within 5'/3' UTRs	3', Rv2257c; 5', Rv2256c		22	51
candidate_1401	2545394	2545637	-	A	243	447.73	0.0033945	0	0	0.888	0.944096	1	AS		Rv2271	-237	-305
candidate_1402	2551622	2551659	-	A	37	185.684	0	1	0	0.289	0.971607	1	AS		Rv2280	-1317	-99
candidate_1403	2552295	2552335	-	A	40	182.488	0	0	0	0.977	0.997303	1	AS		Rv2280	-644	-775
candidate_1404	2561672	2561740	-	A	68	723.667	0	1	0	0.912	0.999747	1	AS		Rv2288; Rv2289	-785	-412
candidate_1405	2562055	2562296	-	A	241	903.289	0	1	0	0.985	0.0817428	1	AS		Rv2289	-402	-621
candidate_1406	2580234	2580285	-	A	51	232.827	0.132573	0	0	0.702	6.6948e-05	0.0743793	Within 5'/3' UTRs	5', Rv2307D		24	134
candidate_1407	2584567	2584633	-	A	66	133.403	0	1	0	0.938	1.66533e-16	2.1716e-13	AS		Rv2312	-188	-147
candidate_1408	2600679	2600716	-	A	37	116.342	0.101521	1	1	0.098	0.999865	1	AS to 5'/3' UTRs		5', Rv2328	200	15
candidate_1409	2608785	2608817	-	A	32	333.394	0.0418312	0	0	0.1	0.994888	1	AS to 5'/3' UTRs		5', Rv2334	-943	-21
candidate_1410	2618910	2618971	-	A	61	237.758	0.12249	1	0	0.207	0.0574896	1	Within 5'/3' UTRs	5', Rv2340c		2	436
candidate_1411	2625714	2625888	-	A	174	444.446	0.0654717	0	0	0.001	1.44964e-08	1.75117e-05	AS to 5'/3' UTRs	3', Rv2346c	3', Rv2345	-89	-2067
candidate_1412	2626569	2626606	-	A	37	275.421	0.138043	0	0	0.977	0.951253	1	Within 5'/3' UTRs	3', Rv22348c; 5', Rv2347c		50	48
candidate_1413	2626980	2627018	-	A	38	820.795	0.0698448	1	1	0.208	5.73563e-12	7.23263e-09	Within 5'/3' UTRs	5', Rv2348c		0	154
candidate_1414	2641081	2641126	-	A	45	132.174	0.643864	1	0	0.03	8.32667e-16	1.08247e-12	Within 5'/3' UTRs	5', Rv2357c		17	120
candidate_1415	2641282	2641336	-	A	54	579.982	0	1	0	0.139	0.718014	1	AS		Rv2358	-371	-90
candidate_1416	2655216	2655318	-	A	102	216.301	0.0643306	0	0	0.857	0.987217	1	AS to 5'/3' UTRs		5', Rv2375	-366	-53
candidate_1417	2655350	2655394	-	A	44	282.933	0	0	0	0.914	0.200855	1	AS		Rv2375	-232	-129
candidate_1418	2656115	2656156	-	A	41	101.31	0.134756	1	0	0.428	7.32414e-13	9.36025e-10	Within 5'/3' UTRs	3', Rv2377c; 5', Rv2376c		0	59
candidate_1419	2692209	2692246	-	A	37	442.211	0.114976	0	0	0.66	0.972307	1	Intergenic			134	553
candidate_1420	2698715	2698745	-	A	30	215.677	0	1	0	0.371	0.878745	1	AS		Rv2402	-1742	-216
candidate_1421	2698780	2698817	-	A	37	264.842	0	1	0	0.657	0.990164	1	AS		Rv2402	-1677	-288
candidate_1422	2710046	2710084	-	A	38	91.6667	0.0991077	0	0	0.986	0.0101618	1	AS to 5'/3' UTRs		5', Rv2412	-289	-9
candidate_1423	2710288	2710351	-	A	63	209.25	0	0	1	0.159	0.00178621	1	AS	3', Rv2413c	Rv2412	-47	-276
candidate_1424	2726660	2726695	-	A	35	161.75	0	0	0	0.337	0.967161	1	AS		Rv2428	-120	-502
candidate_1425	2726755	2726786	-	A	31	110.938	0.025883	1	0	0.588	0.936996	1	AS to 5'/3' UTRs		3', Rv2428	-25	-593
candidate_1426	2727217	2727260	-	A	43	192.682	0	0	1	0.41	0.999116	1	AS		Rv2429	-122	-454
candidate_1427	2727920	2727967	-	A	47	24201.4	0.0951759	1	0	0.667	6.83708e-11	8.519e-08	Within 5'/3' UTRs	3', Rv2431c; 5', Rv2430c		0	0
candidate_1428	2728354	2728437	-	A	83	595.071	0.134756	0	0	0.281	1.28626e-10	1.59367e-07	Within 5'/3' UTRs	3', Rv2432c		88	0
candidate_1429	2741532	2741563	-	A	31	80.25	0	0	0	0.601	0.993646	1	AS		Rv2443	-652	-854
candidate_1430	2751608	2751643	-	A	35	620.278	0.456423	0	0	0.001	0.584417	1	Within 5'/3' UTRs	3', Rv2450c; 5', Rv2449c		36	19
candidate_1431	2759494	2759646	-	A	152	189.928	2.01896	1	0	0.609	0	0	Within 5'/3' UTRs	5', Rv2457c		6	133
candidate_1432	2763849	2763891	-	A	42	823.302	2.27626	0	0	0.477	0.958548	1	Within 5'/3' UTRs	3', Rv2462c; 5', Rv2461c		75	0
candidate_1433	2765480	2765613	-	A	133	686.03	0.579966	0	1	0.277	0.0353861	1	AS to 5'/3' UTRs	5', Rvnt26	5', Rvnt27	-131	-72
candidate_1434	2772242	2772333	-	A	91	917.609	0.101521	1	1	0.799	5.61934e-12	7.0916e-09	Within 5'/3' UTRs	3', Rv2469c		95	34
candidate_1435	2784042	2784079	-	A	37	161.553	0.924845	1	0	0.817	5.74265e-08	6.87395e-05	Within 5'/3' UTRs	3', Rv2478c; 5', Rv2477c		0	44
candidate_1436	2827853	2827890	-	A	37	168.132	0	0	0	0.16	0.993973	1	AS to 5'/3' UTRs		5', Rvnt29	-73	-36
candidate_1437	2835494	2835529	-	A	35	126.417	0	0	0	0.158	0.999397	1	AS		Rvnt30	-72	-35
candidate_1438	2837089	2837249	-	A	160	587.54	0	1	0	0.543	7.75925e-06	0.00883002	AS		Rv2519	-174	-1464
candidate_1439	2837615	2837646	-	A	31	266.656	0.133729	1	0	0.989	0.735909	1	AS to 5'/3' UTRs	5', Rv2520c	5', Rv2521	0	38
candidate_1440	2849342	2849372	-	A	30	147.548	0.138043	0	0	0.991	0.965721	1	Within 5'/3' UTRs	5', Rv2524c		10	480
candidate_1441	2876485	2876521	-	A	36	560.216	0.156252	1	0	0.821	0.0816261	1	Within 5'/3' UTRs	3', Rv2556c; 5', Rv2555c		0	55
candidate_1442	2884958	2884998	-	A	40	168.585	0	1	0	0.969	0.942359	1	AS		Rv2565	-1404	-387
candidate_1443	2886454	2886495	-	A	41	190.643	0	0	1	0.22	0.99649	1	AS		Rv2566	-3341	-122
candidate_1444	2907764	2907798	-	A	34	178.943	1.5389	0	1	0.042	0.787937	1	AS to 5'/3' UTRs	3', Rv2583c	3', Rv2582	24	28
candidate_1445	2910944	2910983	-	A	39	180.675	0.138043	0	0	0.903	4.9738e-14	6.40625e-11	Within 5'/3' UTRs	3', Rv2585c; 5', Rv2584c		44	21
candidate_1446	2916518	2916554	-	A	36	256.081	0	0	1	0.742	0.933048	1	AS		Rv2589	-1191	-194
candidate_1447	2950179	2950489	-	A	310	1162.86	0	0	0	0.267	0.914141	1	AS	3', Rv2624c	Rv2623	-307	-896
candidate_1448	2952503	2952562	-	A	59	345.45	0.131141	0	0	0.398	0.000134739	0.147944	Within 5'/3' UTRs	3', Rv2626c; 5', Rv2625c		0	0
candidate_1449	2952993	2953030	-	A	37	718.105	0.13441	1	0	0.572	1.34112e-07	0.000158922	Within 5'/3' UTRs	5', Rv2626c		0	477
candidate_1450	2955504	2955598	-	A	94	432.621	0.138043	0	0	0.041	0.995973	1	Intergenic			84	169
candidate_1451	2958766	2958796	-	A	30	77.4516	0	0	1	0.92	0.922863	1	AS		Rv2631	-104	-1224
candidate_1452	2959820	2959852	-	A	32	313.303	0.121411	1	0	0.068	0.998089	1	Within 5'/3' UTRs	5', Rv2633c		0	253
candidate_1453	2969570	2969605	-	A	35	136.139	0.138043	1	0	0.735	0.962541	1	Within 5'/3' UTRs	5', Rvnt31		2	148
candidate_1454	2969753	2969786	-	A	33	287.206	0	0	0	0.039	0.985149	1	AS		Rvnt32	-72	-33
candidate_1455	2980932	2980963	-	A	31	119.656	0.0672026	0	0	0.243	0.96627	1	Within 5'/3' UTRs	3', Rv2660c		114	0
candidate_1456	2981852	2982087	-	A	235	260.504	0	0	0	0.068	7.43849e-15	9.63285e-12	AS		Rv2663	-234	-234
candidate_1457	3018450	3018623	-	A	173	185.707	0	1	1	0.19	0.000299331	0.324475	AS		Rv2703	-971	-788
candidate_1458	3018711	3018867	-	A	156	586.025	0	1	1	0.883	0.652463	1	AS		Rv2703	-710	-1032
candidate_1459	3022763	3022870	-	A	107	733.62	0	1	0	0.945	0.713355	1	AS		Rv2710	-669	-409
candidate_1460	3023904	3024065	-	A	161	463.512	0	1	0	0.009	0	0	AS		Rv2711	-353	-500
candidate_1461	3027538	3027587	-	A	49	173.86	0	0	0	0.474	0.044373	1	AS		Rv2714	-501	-522
candidate_1462	3055172	3055252	-	A	80	296.852	0	0	1	0.469	0.829404	1	AS		Rv2741	-319	-1338
candidate_1463	3064235	3064273	-	A	38	103.308	0	1	1	0.26	0.996084	1	AS		Rv2751	-293	-635
candidate_1464	3093748	3093781	-	A	33	161.206	0.462724	0	0	0.639	0.777273	1	Within 5'/3' UTRs	5', Rv2785c		0	124
candidate_1465	3102220	3102273	-	A	53	92.1481	0.237971	0	0	0.142	0.453408	1	Within 5'/3' UTRs	5', Rv2792c		58	91
candidate_1466	3150027	3150068	-	A	41	140.024	0.215357	1	0	0.399	1.16109e-08	1.40492e-05	Within 5'/3' UTRs	5', Rv2842c		51	103
candidate_1467	3173107	3173145	-	A	38	1930.21	0.138043	0	0	0.001	3.59968e-09	4.37722e-06	Within 5'/3' UTRs	3', Rv2861c		107	15
candidate_1468	3214599	3214636	-	A	37	138.289	0.101716	0	1	0.953	0.990098	1	AS to 5'/3' UTRs		5', Rv2905	-973	-8
candidate_1469	3242236	3242288	-	A	52	150.585	0	1	0	0.906	0.262939	1	AS		Rv2928	-747	-90
candidate_1470	3243357	3243429	-	A	72	388.521	0.138043	1	1	0.513	2.62223e-07	0.000309948	AS to 5'/3' UTRs		3', Rv2929	76	268
candidate_1471	3244229	3244360	-	A	131	217.462	0	1	0	0.445	0.887882	1	AS		Rv2930	-1219	-663
candidate_1472	3244585	3244665	-	A	80	133.975	0	1	1	0.934	0.975421	1	AS		Rv2930	-863	-968
candidate_1473	3245319	3245368	-	A	49	221.92	0	1	0	0.793	0.404602	1	AS		Rv2930	-129	-1671
candidate_1474	3248588	3248627	-	A	39	137.35	0	0	0	0.739	0.875282	1	AS		Rv2931	-2487	-3182
candidate_1475	3250881	3251016	-	A	135	722.301	0	1	0	0.818	0.998	1	AS		Rv2931	-194	-5571
candidate_1476	3255629	3255691	-	A	62	170.079	0	0	1	0.763	0.156026	1	AS		Rv2932; Rv2933	-6622	-4619
candidate_1477	3258294	3258348	-	A	54	277.127	0	0	1	0.818	6.24106e-11	7.78884e-08	AS		Rv2933	-3957	-2663
candidate_1478	3272221	3272255	-	A	34	161.629	0	0	0	0.972	0.577865	1	AS		Rv2936	-988	-41
candidate_1479	3272682	3272715	-	A	33	151.412	0	1	1	0.731	0.937976	1	AS		Rv2936	-527	-501
candidate_1480	3272782	3272812	-	A	30	123.226	0	0	0	0.249	0.999361	1	AS		Rv2936	-427	-598
candidate_1481	3276066	3276217	-	A	151	99.0921	0	0	0	0.349	0.693747	1	AS		Rv2939	-151	-1268
candidate_1482	3276252	3276305	-	A	53	114.278	0.138043	0	0	0.541	0.0429236	1	AS to 5'/3' UTRs	3', Rv2940c	3', Rv2939	35	75
candidate_1483	3282729	3282890	-	A	161	245.377	0.359929	1	0	0.522	0	0	Within 5'/3' UTRs	5', Rv2940c		14	445
candidate_1484	3284351	3284396	-	A	45	638.87	0	1	0	0.488	0.0647323	1	AS		Rv2941	-726	-1061
candidate_1485	3284708	3284743	-	A	35	129.778	0	0	1	0.914	0.965464	1	AS		Rv2941	-369	-1408
candidate_1486	3284780	3284819	-	A	39	200.95	0	0	0	0.064	0.999221	1	AS		Rv2941	-297	-1484
candidate_1487	3286205	3286244	-	A	39	149.225	0	1	0	0.429	1.00814e-12	1.28739e-09	AS		Rv2942	-1627	-1174
candidate_1488	3287108	3287147	-	A	39	76.375	0	0	0	0.263	0.448822	1	AS		Rv2942	-724	-2077
candidate_1489	3302436	3302477	-	A	41	152.69	0.10093	0	0	0.911	3.60827e-05	0.0405208	Intergenic			92	626
candidate_1490	3308995	3309145	-	A	150	137.073	0	0	0	0.804	3.69488e-06	0.00424911	AS		Rv2956	-404	-477
candidate_1491	3312856	3312889	-	A	33	172.118	0.138043	0	0	0.664	0.9992	1	Within 5'/3' UTRs	3', Rv2960; 5', Rv2959c		18	64
candidate_1492	3315915	3315945	-	A	30	179.258	0	1	0	0.671	0.996456	1	AS		Rv2963	-541	-709
candidate_1493	3316057	3316136	-	A	79	280.625	0	1	0	0.013	0.0222979	1	AS		Rv2963	-399	-900
candidate_1494	3325703	3325806	-	A	103	310.519	0.136715	1	0	0.786	0.87941	1	Within 5'/3' UTRs	5', Rv2970c		0	128
candidate_1495	3325970	3326122	-	A	152	918.111	0	1	0	0.879	0.0183355	1	AS		Rv2970A; Rv2971	-979	-188
candidate_1496	3331946	3331976	-	A	30	263.226	0.473998	0	1	0.979	0.942647	1	Intergenic			334	95
candidate_1497	3343113	3343176	-	A	63	335.703	0.120787	0	1	0.001	0.0152834	1	AS to 5'/3' UTRs	3', Rv2986c	3', Rv2985	-5	-1011
candidate_1498	3348501	3348547	-	A	46	770.34	0.878429	0	0	0.41	1.13243e-06	0.00131928	AS to 5'/3' UTRs	3', Rvnt35	3', Rv2991	28	0
candidate_1499	3351938	3351978	-	A	40	244.537	0	0	1	0.33	0.989732	1	AS		Rv2994	-668	-709
candidate_1500	3356786	3356836	-	A	50	119.098	0.0471983	0	0	0.996	0.135973	1	AS to 5'/3' UTRs		5', Rv2998	-490	-21
candidate_1501	3359396	3359585	-	A	189	141.837	0.104351	0	1	0.091	0.432498	1	Within 5'/3' UTRs	3', Rv3001c		125	0
candidate_1502	3363023	3363153	-	A	130	214.748	2.0378	1	0	0.001	0	0	Within 5'/3' UTRs	5', Rv3003c		37	195
candidate_1503	3365470	3365520	-	A	50	916.863	0	1	1	0.975	6.16642e-06	0.00704206	AS		Rv3006	-360	-811
candidate_1504	3388905	3388936	-	A	31	156.406	2.60786	1	0	0.54	0.999701	1	Within 5'/3' UTRs	5', Rv3029c		35	165
candidate_1505	3409378	3409421	-	A	43	515.318	0.264055	1	0	0.81	9.97387e-08	0.000118889	Within 5'/3' UTRs	5', Rv3048c		0	88
candidate_1506	3411091	3411133	-	A	42	89.6512	0.101521	1	0	0.372	0.000262013	0.284808	Within 5'/3' UTRs	5', Rv3049c		8	84
candidate_1507	3414958	3415304	-	A	346	1504.99	1.21851	1	0	0.594	0	0	Within 5'/3' UTRs	5', Rv3053c		0	131
candidate_1508	3420803	3420836	-	A	33	68.2647	0	0	1	0.466	0.982337	1	AS		Rv3059	-167	-1344
candidate_1509	3425694	3425726	-	A	32	127.909	0	0	1	0.457	0.985732	1	AS		Rv3062	-1413	-142
candidate_1510	3431805	3431840	-	A	35	1455.61	0	0	1	0.971	0.730337	1	AS to 5'/3' UTRs	3', Rvnt37	3', Rv3067	-33	-412
candidate_1511	3490326	3490369	-	A	43	1359.07	0	0	0	0.203	0.447863	1	AS		Rv3124	-49	-863
candidate_1512	3492130	3492173	-	A	43	399.409	0.0369167	0	0	0.76	0.86597	1	AS to 5'/3' UTRs	5', Rv3126c	5', Rv3127	-1051	-26
candidate_1513	3492638	3492694	-	A	56	104.877	0	0	0	0.093	0.52961	1	AS		Rv3127	-543	-547
candidate_1514	3492737	3492907	-	A	170	610.006	0	1	0	0.851	0.000148764	0.162896	AS		Rv3127	-444	-760
candidate_1515	3494515	3494587	-	A	72	143.822	0.138043	0	1	0.62	0.494477	1	AS to 5'/3' UTRs		5', Rv3129	334	73
candidate_1516	3496366	3496408	-	A	42	322.721	0.134833	0	0	0.115	0	0	Within 5'/3' UTRs	5', Rv3130c		0	143
candidate_1517	3497381	3497529	-	A	148	609.523	0	0	0	0.047	0.631142	1	AS	3', Rv3132c	Rv3131	-168	-978
candidate_1518	3500756	3500788	-	A	32	116.03	0.138043	1	1	0.747	0.956606	1	Within 5'/3' UTRs	5', Rv3134c		7	546
candidate_1519	3501228	3501267	-	A	39	758.625	0.0885269	0	1	0.503	0.910566	1	AS to 5'/3' UTRs		5', Rv3185	479	67
candidate_1520	3501654	3501814	-	A	160	226.658	0.0514445	0	1	0.109	0.861468	1	AS to 5'/3' UTRs		3', Rv3135; 5', Rv3136	-1282	-480
candidate_1521	3502036	3502066	-	A	30	387.677	0	1	0	0.675	0.999865	1	AS		Rv3136	-900	-272
candidate_1522	3502955	3502994	-	A	39	114.925	0.0793541	0	0	0.438	0.922271	1	AS to 5'/3' UTRs		3', Rv3136	19	399
candidate_1523	3503049	3503165	-	A	116	114.214	0.14826	0	0	0.725	0.989323	1	Intergenic			113	228
candidate_1524	3503205	3503279	-	A	74	385	0.116172	1	0	0.174	0.235232	1	Intergenic			269	114
candidate_1525	3505044	3505147	-	A	103	147.173	0	1	0	0.553	0.0020887	1	AS		Rv3138	-239	-952
candidate_1526	3505262	3505301	-	A	39	68.3	0.0720989	1	0	0.393	0.00192887	1	AS to 5'/3' UTRs		3', Rv3138	-21	-1106
candidate_1527	3508966	3509027	-	A	61	180.484	0	0	0	0.367	0.794258	1	AS		Rv3141	-100	-932
candidate_1528	3511601	3511635	-	A	34	174.714	0.929746	0	0	0.951	0.210802	1	AS to 5'/3' UTRs		5', Rv3145	284	47
candidate_1529	3512739	3512781	-	A	42	137.209	0	1	0	0.331	0.481668	1	AS		Rv3147	-599	-153
candidate_1530	3537354	3537390	-	A	36	265.73	0	1	0	0.114	0.97063	1	AS		Rv3169	-1008	-152
candidate_1531	3556866	3557016	-	A	150	306.53	0.0949067	1	0	0.649	0.917834	1	Intergenic			179	295
candidate_1532	3557058	3557283	-	A	225	341.814	0.162915	0	0	1	4.98631e-05	0.0558916	Within 5'/3' UTRs	3', Rv3191c		371	28
candidate_1533	3559326	3559361	-	A	35	272.472	0.260016	0	0	0.001	0.548618	1	Within 5'/3' UTRs	3', Rvnt38		981	9
candidate_1534	3560128	3560161	-	A	33	96.4118	0.101521	0	0	0.001	0.610477	1	Within 5'/3' UTRs	3', Rv3193c		104	33
candidate_1535	3583710	3583759	-	A	49	484.76	0.135282	0	0	0.668	1.58729e-12	2.01903e-09	Within 5'/3' UTRs	3', Rv3207c; 5', Rv3206c		0	42
candidate_1536	3587743	3587775	-	A	32	69.4242	0.348038	0	0	0.931	0.192167	1	AS to 5'/3' UTRs		5', Rv3211	204	23
candidate_1537	3590644	3590678	-	A	34	144.457	1.34256	0	0	0.001	0.998209	1	AS to 5'/3' UTRs	3', Rv3213c	3', Rv3212	27	14
candidate_1538	3595499	3595640	-	A	141	274.38	2.01573	0	1	0.87	0.998976	1	AS to 5'/3' UTRs		3', Rv2118; 5', Rv3219	66	73
candidate_1539	3597801	3598015	-	A	214	1338.87	1.08461	0	0	0.007	0.987996	1	Within 5'/3' UTRs	3', Rv3221A; 5', Rv3221c		35	36
candidate_1540	3600102	3600166	-	A	64	371.262	0	1	1	0.773	0.00788139	1	AS		Rv3224	-597	-315
candidate_1541	3611312	3611427	-	A	115	268.241	0	0	0	0.72	0.204489	1	AS		Rv3235	-629	-127
candidate_1542	3621265	3621466	-	A	201	772.713	1.57184	1	0	0.906	5.83422e-14	7.50864e-11	Within 5'/3' UTRs	5', Rv3241c		11	104
candidate_1543	3640277	3640344	-	A	67	193.059	3.42677	0	0	0.048	5.6259e-08	6.73983e-05	Intergenic			136	199
candidate_1544	3649468	3649505	-	A	37	85.1316	0	0	1	0.079	0.96959	1	AS		Rv3268	-641	-85
candidate_1545	3650186	3650276	-	A	90	117.758	0.0524339	1	0	0.226	0.410929	1	AS to 5'/3' UTRs		5', Rv3269	-329	-42
candidate_1546	3655946	3656049	-	A	103	187.173	0	1	0	0.652	0.998341	1	AS		Rv3273	-985	-1412
candidate_1547	3656639	3656675	-	A	36	420.541	0	0	1	0.743	0.93121	1	AS		Rv3273	-292	-2038
candidate_1548	3660060	3660144	-	A	84	350.071	0	0	1	0.771	0	0	AS		Rv3277	-636	-266
candidate_1549	3660228	3660262	-	A	34	198.771	0	0	0	0.86	0.998695	1	AS		Rv3277	-468	-384
candidate_1550	3660336	3660428	-	A	92	457.559	0	1	0	0.252	0.991936	1	AS		Rv3277	-360	-550
candidate_1551	3664020	3664059	-	A	39	110.425	0	0	0	0.299	0.934231	1	AS		Rv3281	-202	-370
candidate_1552	3698371	3698411	-	A	40	155.732	0	0	0	0.28	0.0110936	1	AS		Rv3311	-1012	-290
candidate_1553	3704765	3704820	-	A	55	209.214	0	1	0	0.538	0.608527	1	AS		Rv3317	-106	-383
candidate_1554	3718158	3718189	-	A	31	119.75	0	1	0	0.012	0.999458	1	AS		Rv3331	-440	-1099
candidate_1555	3786356	3786442	-	A	86	188.506	0	1	0	0.069	0.0591786	1	AS		Rv3372	-1133	-128
candidate_1556	3800005	3800091	-	A	86	812.529	0.0992832	1	0	0.001	0	0	AS to 5'/3' UTRs	5', Rv3385c	5', Rv3386	62	1
candidate_1557	3802776	3802840	-	A	64	153.338	0	1	1	0.627	0	0	AS		Rv3388	-1072	-1187
candidate_1558	3805091	3805129	-	A	38	239.282	0	0	1	0.298	0.0143027	1	AS		Rv3390	-484	-264
candidate_1559	3805208	3805325	-	A	117	202.11	0	0	0	0.286	0.000747037	0.797835	AS		Rv3390	-367	-460
candidate_1560	3805393	3805429	-	A	36	160.135	0	1	1	0.712	0.987342	1	AS		Rv3390	-182	-564
candidate_1561	3821906	3821945	-	A	39	126.275	0.138043	0	0	0.316	0.451182	1	Within 5'/3' UTRs	5', Rv3402c		15	317
candidate_1562	3826888	3826923	-	A	35	90.0833	0	1	0	0.327	0.865722	1	AS	3', Rv3409c	Rv3408	-70	-375
candidate_1563	3831851	3832109	-	A	258	236.969	0	0	1	0.97	0.942153	1	AS	3', Rv3413c	Rv3412	-285	-383
candidate_1564	3835118	3835152	-	A	34	126.257	0	1	0	0.825	0.731887	1	AS		Rv3416	-82	-260
candidate_1565	3837288	3837458	-	A	170	173.509	3.08861	1	0	0.241	9.71653e-06	0.011038	Within 5'/3' UTRs	5', Rv3418c		0	97
candidate_1566	3847276	3847486	-	A	210	246.204	0	0	0	0.722	0.0611261	1	AS		Rv3429	-425	-321
candidate_1567	3847544	3847639	-	A	95	570.26	0	0	0	0.523	4.61614e-12	5.83942e-09	AS	3', Rv3430c	Rv3429	-157	-474
candidate_1568	3877432	3877464	-	A	32	2256.39	0.125493	0	0	0.339	0.377491	1	Within 5'/3' UTRs	3', Rv3457c; 5' Rv3456c		0	0
candidate_1569	3880399	3880432	-	A	33	541.5	0.651143	0	0	0.963	0.352167	1	Within 5'/3' UTRs	3', Rv3462c; 5', Rv3461c		0	0
candidate_1570	3880687	3880769	-	A	82	372.964	0.584741	0	0	0.396	0.00151914	1	Within 5'/3' UTRs	5', Rv3462c		34	138
candidate_1571	3881835	3881886	-	A	51	123.192	0.00265467	1	0	0.714	0.979181	1	AS to 5'/3' UTRs		5', Rv3464	-997	-49
candidate_1572	3882450	3882482	-	A	32	75.9697	0	0	0	0.518	0.999237	1	AS		Rv3464	-382	-645
candidate_1573	3893960	3894000	-	A	40	300.512	0.101521	0	0	0.241	0.998319	1	Intergenic			240	93
candidate_1574	3894033	3894161	-	A	128	597.527	0.0464321	1	0	0.993	0.999972	1	AS to 5'/3' UTRs		5', Rv3477	-356	-68
candidate_1575	3894219	3894262	-	A	43	136.045	0	0	1	0.576	6.96721e-06	0.00794262	AS		Rv3477	-170	-169
candidate_1576	3902850	3902920	-	A	70	1169.83	0.629695	0	0	0.64	0.641731	1	Within 5'/3' UTRs	5', Rv3483c		38	158
candidate_1577	3903230	3903275	-	A	45	79.8696	0	0	0	0.649	3.18598e-07	0.000375946	AS		Rv3484	-1386	-197
candidate_1578	3903332	3903385	-	A	53	167.204	0	0	0	0.961	0.806805	1	AS		Rv3484	-1284	-307
candidate_1579	3904046	3904079	-	A	33	81.4412	0	1	0	0.726	0.991721	1	AS		Rv3484	-570	-1001
candidate_1580	3905825	3905855	-	A	30	257.613	0	0	0	0.657	0.924005	1	AS		Rv3486	-396	-83
candidate_1581*	3907100	3907150	-	A	50	104.725	0.101521	1	0	0.707	0.220069	1	to be excluded - intergenic			93	517
candidate_1582	3907487	3907518	-	A	31	89.1562	0.138043	0	0	0.708	0.00668817	1	Intergenic			480	149
candidate_1583	3920887	3920925	-	A	38	193.205	0.138043	1	0	0.846	0.695744	1	Within 5'/3' UTRs	5', Rv3501c		26	162
candidate_1584	3932217	3932252	-	A	35	176.694	0	0	0	0.426	0.922688	1	AS		Rv3508	-4493	-1247
candidate_1585	3955608	3955646	-	A	38	132.359	0	0	1	0.119	2.49367e-05	0.0281036	AS		Rv3519	-652	-96
candidate_1586	3955706	3955764	-	A	58	142.203	0	0	0	0.416	0.994367	1	AS		Rv3519	-554	-214
candidate_1587	3956043	3956255	-	A	212	189.648	0	1	1	0.438	0.014698	1	AS	3', Rv3520c	Rv3519	-217	-705
candidate_1588	3957483	3957526	-	A	43	261.568	1.13522	1	0	0.295	5.26134e-05	0.0588744	AS to 5'/3' UTRs		5', Rv3521	-949	-5
candidate_1589	3957603	3957646	-	A	43	198.182	0	1	0	0.85	2.22045e-16	2.89102e-13	AS		Rv3521	-829	-125
candidate_1590	3985445	3985476	-	A	31	153.156	1.73491	0	0	0.015	0.952794	1	Within 5'/3' UTRs	5', Rv3545c		0	81
candidate_1591	3987120	3987171	-	A	51	247	0	1	1	0.262	0.00323253	1	AS		Rv3547	-179	-327
candidate_1592	4025799	4025872	-	A	73	849.068	0.0411571	0	1	0.973	0.000834448	0.888687	AS to 5'/3' UTRs		5', Rv3584	-579	-42
candidate_1593	4027888	4027919	-	A	31	141.594	0	0	1	0.814	0.329841	1	AS to 5'/3' UTRs		3', Rv3585; 5', Rv3586	-1079	-28
candidate_1594	4041321	4041367	-	A	46	235.17	1.89722	1	0	0.938	0	0	Within 5'/3' UTRs	3', Rv3598c; 5', Rv3597c		2	56
candidate_1595	4052891	4052931	-	A	40	499.537	1.65565	1	0	0.849	0.311751	1	AS to 5'/3' UTRs	5', Rv3610c	5', Rv3611	8	19
candidate_1596	4056375	4056445	-	A	70	233.761	0.136099	1	0	0.313	5.50088e-05	0.0614448	Within 5'/3' UTRs	5', Rv3616c		0	1288
candidate_1597	4067410	4067558	-	A	148	348.06	0.0111175	1	1	0.69	2.65398e-10	3.2697e-07	AS to 5'/3' UTRs		5', Rv3628	-501	-135
candidate_1598	4071674	4071841	-	A	167	349.065	0.0953153	1	1	0.01	0.045433	1	AS to 5'/3' UTRs		5', Rv3633	-992	-50
candidate_1599	4079749	4079784	-	A	35	477.056	0.110834	0	0	0.983	0.963954	1	Within 5'/3' UTRs	5', Rv3640c		0	141
candidate_1600	4082867	4083070	-	A	203	612.162	0	1	0	0.042	7.26952e-11	9.05056e-08	AS		Rv3645	-1589	-263
candidate_1601	4088647	4088710	-	A	63	461.031	6.03671	0	0	0.01	1.14908e-11	1.44439e-08	AS to 5'/3' UTRs		5', Rv3649	116	71
candidate_1602	4092271	4092301	-	A	30	358.548	0	1	1	0.981	0.879534	1	AS		Rv3651	-607	-460
candidate_1603	4099384	4099477	-	A	93	2468.26	4.12993	1	0	0.001	0	0	Intergenic			236	170
candidate_1604	4100705	4100778	-	A	73	215.824	1.85328	1	0	0.211	0.995586	1	Intergenic			195	487
candidate_1605	4100899	4100938	-	A	39	207.2	0.738632	0	0	0.981	0.924828	1	Intergenic			389	327
candidate_1606	4108495	4108590	-	A	95	373.438	0	0	0	0.116	0	0	AS		Rv3667	-1252	-798
candidate_1607	4108759	4108790	-	A	31	232.688	0	1	0	0.975	0.160386	1	AS		Rv3667	-988	-998
candidate_1608	4109595	4109633	-	A	38	307.231	0	0	0	0.447	5.11036e-13	6.53615e-10	AS		Rv3667	-152	-1841
candidate_1609	4116278	4116321	-	A	43	118.864	0	1	0	0.326	1.01356e-07	0.000120715	AS		Rv3675	-101	-319
candidate_1610	4119249	4119291	-	A	42	161.907	0	0	1	0.02	0.938744	1	AS		Rv3679	-549	-515
candidate_1611	4119960	4120184	-	A	224	789.307	0	1	1	0.524	0.00548999	1	AS		Rv3680	-995	-389
candidate_1612	4121675	4121713	-	A	38	82.641	1.78349	1	0	0.876	9.7731e-08	0.000116593	Intergenic			121	203
candidate_1613	4122231	4122264	-	A	33	112.029	0	0	0	0.874	0.991045	1	AS		Rv3682	-2117	-348
candidate_1614	4125745	4125797	-	A	52	610.226	0	1	0	0.771	0	0	AS		Rv3684	-734	-358
candidate_1615	4130799	4130831	-	A	32	227.939	0	0	0	0.718	0.0841244	1	AS		Rv3689	-913	-474
candidate_1616	4132660	4132696	-	A	36	126.351	0	0	1	0.508	0.0021316	1	AS		Rv3691	-859	-178
candidate_1617	4160933	4160974	-	A	41	530.381	2.16999	1	0	0.154	0.502621	1	AS to 5'/3' UTRs	5', Rv3716c	5', Rv3717	20	74
candidate_1618	4162950	4162997	-	A	47	244.333	0	1	0	0.992	0.901731	1	AS		Rv3719	-768	-691
candidate_1619	4163544	4163598	-	A	54	422.291	0	0	1	0.467	0.643999	1	AS		Rv3719	-174	-1292
candidate_1620	4163631	4163693	-	A	62	143.825	0	0	0	0.778	0.0294011	1	AS		Rv3719	-87	-1387
candidate_1621	4168193	4168281	-	A	88	957.27	3.68358	1	0	0.042	0	0	AS to 5'/3' UTRs	5', Rv3722c	5', Rvnt41	65	64
candidate_1622	4168345	4168414	-	A	69	148.343	0	0	0	0.544	3.80679e-12	4.81939e-09	AS		Rvnt41	-85	-69
candidate_1623	4171065	4171329	-	A	264	428.491	0.0793614	1	1	0.14	0.00698666	1	AS to 5'/3' UTRs		3', Rv3725	-78	-1115
candidate_1624	4174151	4174187	-	A	36	196.946	0	1	0	0.926	0.999395	1	AS		Rv3727	-612	-1232
candidate_1625	4187462	4187505	-	A	43	214.818	0	0	1	0.19	0.557068	1	AS		Rv3736	-233	-871
candidate_1626	4187918	4187956	-	A	38	83.9487	0	0	0	0.58	0.888624	1	AS		Rv3737	-1370	-257
candidate_1627	4209017	4209163	-	A	146	79.3741	0.184577	0	0	0.583	0.764217	1	AS to 5'/3' UTRs		5', Rv3763	-509	-116
candidate_1628	4209210	4209525	-	A	315	641.231	0	1	1	0.104	0.0938373	1	AS	3', Rv3764c	Rv3763	-316	-478
candidate_1629	4212140	4212176	-	A	36	120.973	0.138043	0	0	0.342	0.953401	1	Intergenic			356	117
candidate_1630	4228811	4228842	-	A	31	86.1562	0	1	0	0.751	0.984976	1	AS		Rv3782	-450	-495
candidate_1631	4231276	4231319	-	A	43	169.432	0.0992137	1	1	0.115	0.227712	1	AS to 5'/3' UTRs		3', Rv3784; 5', Rv3785	40	1
candidate_1632	4236552	4236626	-	A	74	187.733	0	1	1	0.01	0.719278	1	AS		Rv3790	-612	-847
candidate_1633	4237772	4237811	-	A	39	92.75	0	1	0	0.573	0.77218	1	AS		Rv3791	-157	-646
candidate_1634	4237858	4237910	-	A	52	169.887	0	0	0	0.473	0.133787	1	AS		Rv3791	-71	-745
candidate_1635	4263177	4263212	-	A	35	110.056	0.777928	1	1	0.109	0.199074	1	Intergenic			111	143
candidate_1636	4264365	4264395	-	A	30	202.387	0.13359	0	0	0.749	0.987782	1	Within 5'/3' UTRs	5', Rv3802c		0	168
candidate_1637	4266682	4266750	-	A	68	373.609	0.880417	0	0	0.43	0.260976	1	Within 5'/3' UTRs	5', Rv3804c		24	203
candidate_1638	4273795	4273944	-	A	149	107.567	0	1	0	0.29	0.0670164	1	AS		Rv3810	-798	-205
candidate_1639	4274156	4274337	-	A	181	147.253	0	1	1	0.049	0.00824216	1	AS		Rv3810	-437	-598
candidate_1640	4274668	4274715	-	A	47	298.083	0.19749	0	1	0.91	0.0733781	1	AS to 5'/3' UTRs		3', Rv3810	75	83
candidate_1641	4275429	4275625	-	A	196	165.315	0	1	0	0.87	0.737309	1	AS		Rv3811	-988	-827
candidate_1642	4286822	4286926	-	A	104	800.81	0	1	0	0.732	0.999553	1	AS		Rv3822	-1113	-205
candidate_1643	4287414	4287451	-	A	37	136.316	0	1	1	0.864	0.825952	1	AS		Rv3822	-521	-730
candidate_1644	4320597	4320644	-	A	47	576.375	0.446323	0	0	0.518	0.560597	1	AS to 5'/3' UTRs		5', Rv3846	957	60
candidate_1645	4320778	4320810	-	A	32	79.3939	0	0	0	0.871	0.554812	1	AS		Rv3846	-549	-106
candidate_1646	4321145	4321290	-	A	145	268.466	0	1	0	0.679	0.992867	1	AS		Rv3846	-182	-586
candidate_1647	4321338	4321379	-	A	41	458.714	0.138043	0	0	0.816	0.948314	1	AS to 5'/3' UTRs		3', Rv3846	11	159
candidate_1648	4321846	4321883	-	A	37	113.105	0	0	1	0.963	0	0	AS		Rv3847	-225	-345
candidate_1649	4336194	4336309	-	A	115	720.991	1.83577	1	1	0.321	3.35722e-10	4.13273e-07	Intergenic			113	468
candidate_1650	4336603	4336642	-	A	39	98.525	0.138043	1	0	0.514	0.932168	1	Intergenic			522	135
candidate_1651	4341477	4341694	-	A	217	713.83	0.142351	1	1	0.051	0.0004517	0.486481	AS to 5'/3' UTRs		3', Rv3864; 5', Rv3865	-400	-1424
candidate_1652	4342794	4342829	-	A	35	216.028	0	0	0	0.692	0.0010267	1	AS		Rv3867	-527	-59
candidate_1653	4344915	4344948	-	A	33	137.735	0	1	1	0.658	0.97534	1	AS		Rv3868	-120	-1634
candidate_1654	4351432	4351479	-	A	47	202.146	0	0	1	0.027	0.278009	1	AS		Rv3873	-749	-404
candidate_1655	4352925	4352971	-	A	46	417.915	0.210072	0	0	0.008	0.979114	1	AS to 5'/3' UTRs		3', Rv3875; 5', Rv3876	29	39
candidate_1656	4353072	4353104	-	A	32	192.394	0	1	0	0.135	0.142555	1	AS		Rv3876	-1938	-94
candidate_1657	4354387	4354477	-	A	90	250.945	0	1	0	0.309	2.47914e-06	0.00285845	AS		Rv3876	-623	-1467
candidate_1658	4354680	4354710	-	A	30	100.968	0	0	1	0.801	0.999707	1	AS		Rv3876	-330	-1700
candidate_1659	4354746	4354842	-	A	96	86.8351	0	0	0	0.435	0.991058	1	AS		Rv3876	-264	-1832
candidate_1660	4355151	4355183	-	A	32	153.121	0	1	0	0.257	0.99861	1	AS		Rv3877	-1391	-176
candidate_1661	4356930	4356970	-	A	40	139.195	0	0	1	0.172	0.906032	1	AS		Rv3878	-605	-277
candidate_1662	4357029	4357066	-	A	37	77.5526	0	0	0	0.11	0.102585	1	AS		Rv3878	-506	-373
candidate_1663	4364757	4364822	-	A	65	426.045	0.123408	1	0	0.895	6.22605e-05	0.069296	Within 5'/3' UTRs	5', Rv3883c		0	157
candidate_1664	4383985	4384018	-	A	33	479.618	0.131696	0	0	0.066	0.999087	1	Within 5'/3' UTRs	5', Rv3898c		0	129
candidate_1665	4399307	4399339	-	A	32	112.121	0	0	1	0.712	0.132024	1	AS		Rv3910	-844	-2742
candidate_1666	4402676	4402800	-	A	124	251.328	0	0	1	0.299	7.67123e-06	0.00873753	AS		Rv3913; Rv3914	-406	-1072
candidate_1667	4402927	4402976	-	A	49	111.62	0	0	1	0.155	0.150969	1	AS		Rv3914	-155	-244
candidate_1668	4405233	4405302	-	A	69	122.043	0.101521	0	0	0.694	0.974841	1	Within 5'/3' UTRs	5', Rv3916c		66	155
candidate_1669	4411296	4411334	-	A	38	142.974	0.0435244	0	0	0.32	0.896703	1	Intergenic			367	-4411334
candidate_1670	25449	25479	-	B	30	64.7742	0.94984	1	0	0.838			Within 5'/3' UTRs	5', Rv0020c		5	165
candidate_1671	31926	31967	-	B	41	107.952	1.30664	1	1	0.881			Intergenic			107	90
candidate_1672	79142	79178	-	B	36	87.7838	0.94984	0	0	0.632			Intergenic			246	308
candidate_1673	141023	141056	-	B	33	135.647	0.960122	1	0	0.3			Within 5'/3' UTRs	5', Rv0116c		1	144
candidate_1674	196663	196708	-	B	45	118.478	0.960122	0	0	0.806			AS to 5'/3' UTRs		3', Rv0166	6	153
candidate_1675	196777	196808	-	B	31	141.375	1.93322	0	0	0.775			AS to 5'/3' UTRs		5', Rv0167	120	53
candidate_1676	293603	293659	-	B	56	388.509	1.96753	0	0	0.18			Intergenic			110	139
candidate_1677	459407	459446	-	B	39	90.225	0.94984	0	1	0.133			Within 5'/3' UTRs	3', Rv0384c		92	10
candidate_1678	462039	462071	-	B	32	45.9091	4.74667	1	0	0.411			AS to 5'/3' UTRs	5', Rv0384c	5', Rv0385	37	64
candidate_1679	559825	559865	-	B	40	48.0976	0.94984	0	0	0.768			AS to 5'/3' UTRs		3', Rv0468; 5', Rv0469	70	23
candidate_1680	736246	736296	-	B	50	48.0588	2.10458	0	0	0.004			AS to 5'/3' UTRs	3', Rv0642c	3', Rv0641	22	2
candidate_1681	759588	759627	-	B	39	150.95	5.37202	0	0	0.407			Intergenic			279	180
candidate_1682	759630	759705	-	B	75	65.6053	2.34487	1	0	0.092			Intergenic			321	102
candidate_1683	850554	850592	-	B	38	46.1538	1.49982	0	0	0.612			Within 5'/3' UTRs	3', Rvnt09; 5', Rv0755A		27	50
candidate_1684	958469	958506	-	B	37	34.8158	2.76529	0	0	0.001			AS to 5'/3' UTRs	3', Rv0861c	3', Rv0860	14	17
candidate_1685	967819	967852	-	B	33	42.7941	1.98344	0	1	0.002			AS to 5'/3' UTRs		5', Rv0871	86	46
candidate_1686	1133275	1133313	-	B	38	104.538	1.52456	0	0	0.001			AS to 5'/3' UTRs	3', Rv1014c	3', Rv1013	16	20
candidate_1687	1196216	1196277	-	B	61	265.323	1.36088	0	0	0.429			AS to 5'/3' UTRs		5', Rv1072	124	2
candidate_1688	1224323	1224367	-	B	44	61.4222	1.98273	0	0	0.002			AS to 5'/3' UTRs		3', Rv1095; 5', Rv1096	25	18
candidate_1689	1261608	1261672	-	B	64	188.031	2.68969	0	0	0.011			Intergenic			262	250
candidate_1690	1272000	1272034	-	B	34	45.0571	2.42084	0	0	0.12			Intergenic			92	389
candidate_1691	1301227	1301265	-	B	38	100.256	2.92445	1	1	0.512			AS to 5'/3' UTRs		3', Rv1170; 5', Rv1171	12	42
candidate_1692	1364352	1364396	-	B	44	996.267	1.77192	1	1	0.199			AS to 5'/3' UTRs		5', Rv1221	202	17
candidate_1693	1413102	1413139	-	B	37	330.158	0.960122	0	1	0.957			AS to 5'/3' UTRs		3', Rv1264	15	121
candidate_1694	1413142	1413173	-	B	31	28.8125	0.960122	0	0	0.648			AS to 5'/3' UTRs		3', Rv1264	55	87
candidate_1695	1453007	1453085	-	B	78	46.6456	2.1058	0	0	0.446			AS to 5'/3' UTRs		3', Rv1296	60	119
candidate_1696	1473471	1473502	-	B	31	831.156	2.79901	0	0	0.102			Intergenic			89	156
candidate_1697	1655543	1655576	-	B	33	112.353	1.31252	1	0	0.918			Within 5'/3' UTRs	3', Rv1468c; 5', Rv1467c		41	33
candidate_1698	1735503	1735534	-	B	31	56.125	3.07979	1	0	0.11			Intergenic			92	442
candidate_1699	2072564	2072594	-	B	30	39.4839	4.82887	0	0	0.541			AS to 5'/3' UTRs		5', Rv1827	208	2
candidate_1700	2096821	2096858	-	B	37	45.0263	1.62048	0	0	0.001			AS to 5'/3' UTRs		5', Rv1847	222	19
candidate_1701	2307105	2307138	-	B	33	37.8235	2.16944	0	1	0.187			Intergenic			119	155
candidate_1702	2405404	2405436	-	B	32	65.5152	0.94984	1	0	0.78			Within 5'/3' UTRs	5', Rv2145c		6	230
candidate_1703*	2429374	2429404	-	B	30	4989.29	4.16389	0	0	0.685			to be excluded - within 3'/5' UTRs			105	23
candidate_1704	2432015	2432045	-	B	30	113.645	1.86924	1	0	0.284			Within 5'/3' UTRs	5', Rv2169c		46	190
candidate_1705	2500791	2500821	-	B	30	1927.52	4.92017	1	0	0.508			Within 5'/3' UTRs	5', Rvns01		40	110
candidate_1706	2603541	2603576	-	B	35	55.2778	1.55358	0	0	0.887			Intergenic			80	119
candidate_1707	2608529	2608559	-	B	30	118.935	0.94984	0	0	0.773			Intergenic			208	237
candidate_1708	2745156	2745190	-	B	34	52.9143	2.60786	0	1	0.516			Intergenic			172	124
candidate_1709	2763817	2763848	-	B	31	1167.12	1.03614	0	0	0.593			Within 5'/3' UTRs	3', Rv2462c; 5', Rv2461c		43	43
candidate_1710	3017750	3017786	-	B	36	54.2973	3.29248	0	0	0.437			AS to 5'/3' UTRs		5', Rv2703	95	49
candidate_1711	3023450	3023490	-	B	40	46.6341	1.41912	0	0	0.002			AS to 5'/3' UTRs		3', Rv2710; 5', Rv2711	18	75
candidate_1712	3093789	3093825	-	B	36	106.811	3.38458	1	0	0.179			Within 5'/3' UTRs	5', Rv2785c		41	80
candidate_1713	3149977	3150007	-	B	30	96.9677	4.94529	0	0	0.442			Within 5'/3' UTRs	5', Rv2842c		1	164
candidate_1714	3343821	3343861	-	B	40	32.2439	3.97293	1	0	0.638			Within 5'/3' UTRs	5', Rv2986c		1	172
candidate_1715	3409422	3409483	-	B	61	30.1613	2.53487	0	0	0.192			Within 5'/3' UTRs	3', Rv3049c; 5', Rv3048c		44	26
candidate_1716	3587699	3587732	-	B	33	86.4706	1.35748	0	0	0.603			AS to 5'/3' UTRs		5', Rv3211	160	66
candidate_1717	3595983	3596013	-	B	30	65.3548	0.960122	0	0	0.001			AS to 5'/3' UTRs	3', Rv3220c	3', Rv3219	16	16
candidate_1718	3640345	3640376	-	B	31	50.1875	5.35206	0	0	0.828			Intergenic			204	167
candidate_1719	3640453	3640486	-	B	33	187.559	0.94984	0	0	0.638			AS to 5'/3' UTRs		5', Rv3261	312	57
candidate_1720	3880172	3880228	-	B	56	43.1228	0.94984	0	0	0.396			Within 5'/3' UTRs	3', Rv3461c		102	58
candidate_1721	4016288	4016335	-	B	47	55.5208	2.26693	1	0	0.855			Within 5'/3' UTRs	5', Rv3573c		76	149
candidate_1722	4121632	4121674	-	B	42	63.814	1.63809	1	0	0.382			Within 5'/3' UTRs	5', Rv3681c		78	242
candidate_1723	13591	13643	-	C	52	16.9057	3.54575	1	0	0.181			Within 5'/3' UTRs	3', Rv011c; 5', Rv0010c		33	71
candidate_1724	23792	23822	-	C	30	11.1613	2.20023	0	0	0.304			Within 5'/3' UTRs	3', Rv0020c; 5', Rv0019c		55	39
candidate_1725	58103	58144	-	C	41	307.643	5.32166	0	0	0.247			AS to 5'/3' UTRs		5', Rv0053	130	48
candidate_1726	133844	133878	-	C	34	11.2286	2.49003	0	0	0.903			AS to 5'/3' UTRs		3', Rv0110; 5', Rv0111	75	72
candidate_1727	139757	139790	-	C	33	5.94118	1.77192	0	1	0.683			Intergenic			84	477
candidate_1728	154131	154229	-	C	98	0.494949	2.5742	0	1	0.185			AS to 5'/3' UTRs		3', Rv0126; 5', Rv0127	2	3
candidate_1729	157618	157669	-	C	51	8.09615	1.77192	0	0	0.933			Within 5'/3' UTRs	5', Rv0129c		18	178
candidate_1730	183234	183290	-	C	56	0.736842	2.16697	0	0	0.002			Within 5'/3' UTRs	5', Rv0154c		36	332
candidate_1731	248917	248966	-	C	49	2.9	3.8942	0	0	0.463			AS to 5'/3' UTRs	5', Rv0208c	5', Rv0209	11	72
candidate_1732	267765	267809	-	C	44	11.8889	2.58929	1	1	0.461			Within 5'/3' UTRs	3', Rv0224c; 5', Rv0223c		1	54
candidate_1733	272862	272949	-	C	87	2.84091	3.35605	0	0	0.639			Within 5'/3' UTRs	5', Rv0227c		23	106
candidate_1734	292099	292131	-	C	32	19.3939	4.02278	0	0	0.421			AS to 5'/3' UTRs	5', Rv0242c	5', Rv0243	70	40
candidate_1735	293666	293708	-	C	42	29.6512	1.77192	0	0	0.001			Intergenic			173	90
candidate_1736	295694	295724	-	C	30	135.903	2.36517	1	0	0.215			Within 5'/3' UTRs	5', Rv0244c		61	281
candidate_1737	330345	330375	-	C	30	4.77419	3.11625	0	0	0.003			AS to 5'/3' UTRs	5', Rv0273c	5', Rv0274	20	47
candidate_1738	436803	436834	-	C	31	1.21875	2.29568	1	0	0.508			AS to 5'/3' UTRs	5', Rv0357c	5', Rv0358	34	26
candidate_1739	501054	501140	-	C	86	2.17241	3.92971	0	0	0.847			AS to 5'/3' UTRs	5', Rv0414c	5', Rv0415	36	8
candidate_1740	510229	510321	-	C	92	4.09677	5.47973	1	0	0.244			Within 5'/3' UTRs	3', Rv0424c; 5', Rv0423c		4	56
candidate_1741	528388	528465	-	C	77	32.0897	4.88044	0	0	0.011			Within 5'/3' UTRs	5', Rv0439c		74	143
candidate_1742	528508	528606	-	C	98	18.0909	2.53873	0	0	0.792			AS to 5'/3' UTRs		5', Rv0440	194	2
candidate_1743	549616	549648	-	C	32	0	1.77192	0	0	0.679			AS to 5'/3' UTRs	5', Rv0457c	5', Rv0458	9	27
candidate_1744	557298	557331	-	C	33	0	1.77192	0	0	0.522			AS to 5'/3' UTRs		3', Rv0466	46	196
candidate_1745	557416	557446	-	C	30	9.19355	1.79607	1	0	0.082			Intergenic			164	81
candidate_1746	565684	565729	-	C	45	20.6087	1.78578	1	1	0.486			AS to 5'/3' UTRs		5', Rv0475	241	68
candidate_1747	573881	573920	-	C	39	12.625	1.77192	0	1	0.633			AS to 5'/3' UTRs		5', Rv0485	80	64
candidate_1748	580584	580646	-	C	62	5.30159	2.69058	1	0	0.555			AS to 5'/3' UTRs		3', Rv0490	3	163
candidate_1749	580654	580723	-	C	69	0.285714	2.64675	1	0	0.418			Intergenic			73	86
candidate_1750	580731	580799	-	C	68	0.318841	2.65771	0	0	0.417			AS to 5'/3' UTRs		5', Rv0491	150	10
candidate_1751	590978	591109	-	C	131	20.6364	4.72527	0	0	0.377			AS to 5'/3' UTRs		3', Rv0500; 5', Rv0550A	8	2
candidate_1752	595345	595387	-	C	42	9.04651	2.29794	0	1	0.154			Within 5'/3' UTRs	5', Rv0504c		43	77
candidate_1753	595399	595445	-	C	46	3	2.25244	1	0	0.098			Within 5'/3' UTRs	3', Rv0505c		97	19
candidate_1754	629962	629996	-	C	34	19.2286	1.77192	1	0	0.161			AS to 5'/3' UTRs		5', Rv0538	231	44
candidate_1755	731413	731468	-	C	55	122.286	2.37237	0	0	0.285			AS to 5'/3' UTRs		3', Rv0634A; 5', Rvnt06	49	26
candidate_1756	733347	733398	-	C	51	6.26923	2.19175	0	1	0.206			AS to 5'/3' UTRs		3', Rv0637	22	126
candidate_1757	735458	735500	-	C	42	8.69767	3.0364	0	1	0.358			AS to 5'/3' UTRs		3', Rv0640; 5', Rv0641	8	17
candidate_1758	748056	748151	-	C	95	10.9479	4.79631	0	1	0.733			Intergenic			111	125
candidate_1759	755265	755306	-	C	41	1.04762	2.75433	0	0	0.311			Within 5'/3' UTRs	3', Rv0661c; 5', Rv0660c		40	29
candidate_1760	759551	759587	-	C	36	1.78378	4.66681	0	1	0.138			Intergenic			242	220
candidate_1761	781333	781392	-	C	59	23.6667	1.77192	0	0	0.435			AS to 5'/3' UTRs		3', Rv0681	22	168
candidate_1762	784765	784816	-	C	51	36.75	2.47576	0	0	0.192			AS to 5'/3' UTRs		5', Rv0685	175	5
candidate_1763	787044	787075	-	C	31	3.71875	1.77192	0	0	0.792			AS to 5'/3' UTRs		5', Rv0687	98	24
candidate_1764	791789	791826	-	C	37	7.05263	2.53292	0	0	0.086			AS to 5'/3' UTRs		5', Rv0692	123	5
candidate_1765	795471	795517	-	C	46	0	2.55473	0	1	0.574			AS to 5'/3' UTRs		3', Rv0695; 5', Rv0696	1	2
candidate_1766	800187	800384	-	C	197	16.7778	3.62894	1	1	0.015			Intergenic			337	103
candidate_1767	802436	802471	-	C	35	93.6667	2.60786	0	0	0.911			AS to 5'/3' UTRs		3', Rv0703	1	57
candidate_1768	811205	811251	-	C	46	2.14894	1.77192	0	1	0.08			Intergenic			318	122
candidate_1769	812897	812965	-	C	68	32.0145	2.28075	0	1	0.111			AS to 5'/3' UTRs		5', Rv0718	85	11
candidate_1770	824692	824760	-	C	68	2.05797	2.26222	1	0	0.84			AS to 5'/3' UTRs	5', Rv0731c	5', Rv0732	53	40
candidate_1771	863161	863193	-	C	32	0	2.57076	0	0	0.368			AS to 5'/3' UTRs		3', Rv0769; 5', Rv0770	3	63
candidate_1772	908019	908063	-	C	44	6.42222	1.84871	0	0	0.378			Within 5'/3' UTRs	5', Rv0813c		1	118
candidate_1773	918754	918817	-	C	63	496	3.84861	0	1	0.97			Within 5'/3' UTRs	5', Rv0824c		4	95
candidate_1774	923931	923997	-	C	66	5.74627	3.37734	0	0	0.28			AS to 5'/3' UTRs	5', Rvnt10	5', Rvnt11	56	2
candidate_1775	954966	955004	-	C	38	0	2.19092	0	0	0.003			AS to 5'/3' UTRs	5', Rv0858c	5', Rv0859	46	73
candidate_1776	960172	960326	-	C	154	0.348387	2.48921	0	0	0.934			Within 5'/3' UTRs	3', Rv0862c; 5', Rv0861c		21	16
candidate_1777	965675	965719	-	C	44	19.6222	3.1864	0	0	0.059			Intergenic			140	264
candidate_1778	967853	967887	-	C	34	4.34286	1.88079	0	0	0.076			AS to 5'/3' UTRs		5', Rv0871	120	11
candidate_1779	981268	981314	-	C	46	490.298	2.18188	1	0	0.461			Within 5'/3' UTRs	5', Rv0883c		1	110
candidate_1780	1057971	1058107	-	C	136	28.3723	4.03031	0	0	0.011			Within 5'/3' UTRs	5', Rv0948c		8	153
candidate_1781	1064052	1064110	-	C	58	6.44068	2.75749	0	1	0.001			AS to 5'/3' UTRs	3', Rv0953c	3', Rv0952	1	4
candidate_1782	1112251	1112305	-	C	54	2.12727	3.71719	0	0	0.014			AS to 5'/3' UTRs		3', Rv0995; 5', Rv0996	28	79
candidate_1783	1131444	1131474	-	C	30	10.1613	2.26683	1	0	0.106			AS to 5'/3' UTRs		3', Rv1012	23	151
candidate_1784	1131500	1131543	-	C	43	22.0227	2.27115	0	0	0.966			AS to 5'/3' UTRs		3', Rv1012	79	82
candidate_1785	1179348	1179394	-	C	46	0.489362	2.57275	0	0	0.282			AS to 5'/3' UTRs		5', Rv1057	956	2
candidate_1786	1187326	1187360	-	C	34	0.628571	2.28144	0	0	0.557			AS to 5'/3' UTRs	5', Rv1064c	5', Rv1065	3	75
candidate_1787	1205926	1205966	-	C	40	37.122	3.38439	1	0	0.001			Within 5'/3' UTRs	3', Rv1081c		128	18
candidate_1788	1222828	1222875	-	C	47	3.375	2.50381	0	1	0.608			AS to 5'/3' UTRs		3', Rv1094	42	122
candidate_1789	1236098	1236132	-	C	34	4.4	1.77192	1	0	0.48			AS to 5'/3' UTRs	5', Rv1109c	5', Rv1110	3	53
candidate_1790	1261436	1261486	-	C	50	27.098	3.4053	0	0	0.337			Intergenic			90	436
candidate_1791	1261525	1261557	-	C	32	21.0303	1.88481	0	0	0.725			Intergenic			179	365
candidate_1792	1271968	1271999	-	C	31	33.5	2.45372	0	1	0.043			AS to 5'/3' UTRs		3', Rv1144	60	424
candidate_1793	1272190	1272237	-	C	47	20.8333	3.53378	0	0	0.316			Intergenic			282	186
candidate_1794	1284908	1284963	-	C	55	0.732143	2.45226	0	0	0.754			AS to 5'/3' UTRs	5', Rv1158c	5', Rv1159	46	29
candidate_1795	1354174	1354218	-	C	44	22.2889	2.19082	0	0	0.519			AS to 5'/3' UTRs		3', Rv1210; 5', Rv1211	38	25
candidate_1796	1374260	1374304	-	C	44	25.7778	1.77192	0	0	0.374			Within 5'/3' UTRs	3', Rv1231c; 5', Rv1230c		63	18
candidate_1797	1425327	1425380	-	C	53	3.12963	3.36844	0	0	0.167			AS to 5'/3' UTRs	3', Rv1276c	3', Rv1275	34	58
candidate_1798	1451780	1451817	-	C	37	0.631579	2.19525	0	0	0.587			AS to 5'/3' UTRs		3', Rv1295	1	180
candidate_1799	1451835	1451874	-	C	39	0	2.19525	0	0	0.61			AS to 5'/3' UTRs		3', Rv1295	56	123
candidate_1800	1451892	1451931	-	C	39	0	2.19525	0	0	0.581			AS to 5'/3' UTRs		5', Rv1296	113	66
candidate_1801	1451949	1451988	-	C	39	1.3	2.19525	0	0	0.587			AS to 5'/3' UTRs		5', Rv1296	170	9
candidate_1802	1452962	1453006	-	C	44	3.04444	2.20023	0	0	0.232			AS to 5'/3' UTRs		3', Rv1296	15	198
candidate_1803	1453086	1453202	-	C	116	7.11966	1.9453	1	0	0.32			AS to 5'/3' UTRs		5', Rv1297	139	2
candidate_1804	1455047	1455086	-	C	39	5.4	2.85303	0	0	0.948			AS to 5'/3' UTRs		3', Rv1297; 5', Rv1298	35	77
candidate_1805	1455413	1455459	-	C	46	32.234	1.77192	0	0	0.001			AS to 5'/3' UTRs		3', Rv1298; 5', Rv1299	8	36
candidate_1806	1459586	1459619	-	C	33	14.6176	3.06672	0	0	0.785			AS to 5'/3' UTRs		3', Rv1302	77	147
candidate_1807	1459643	1459715	-	C	72	4.57534	3.15499	0	0	0.952			AS to 5'/3' UTRs		5', Rv1303	134	51
candidate_1808	1507535	1507571	-	C	36	1.86486	2.54204	0	1	0.103			AS to 5'/3' UTRs		3', Rv1340; 5', Rv1341	1	2
candidate_1809	1625366	1625416	-	C	50	1.33333	2.5595	0	0	0.159			Within 5'/3' UTRs	3', Rv1447c; 5', Rv1446c		1	2
candidate_1810	1634970	1635009	-	C	39	5.7	2.01679	0	0	0.707			AS to 5'/3' UTRs		5', Rv1451	343	20
candidate_1811	1644261	1644360	-	C	99	0	2.59548	0	0	0.13			Within 5'/3' UTRs	3', Rv1459c; 5', Rv1458c		1	3
candidate_1812	1666047	1666089	-	C	42	51.5116	2.19525	1	0	0.287			Within 5'/3' UTRs	5', Rv1475c		1	115
candidate_1813	1666829	1666928	-	C	99	14.1	2.63234	0	0	0.015			AS to 5'/3' UTRs		3', Rv1476; 5', Rv1477	65	62
candidate_1814	1669168	1669228	-	C	60	7.68852	2.33515	0	1	0.561			AS to 5'/3' UTRs		3', Rv1478; 5', Rv1479	24	55
candidate_1815	1735535	1735675	-	C	140	29.0284	2.82101	0	0	0.025			Intergenic			124	301
candidate_1816	1735775	1735826	-	C	51	288.481	1.77192	0	0	0.179			Intergenic			364	150
candidate_1817	1736296	1736456	-	C	160	3.19255	4.77936	0	1	0.987			AS to 5'/3' UTRs		5', Rv1536	84	63
candidate_1818	1747645	1747692	-	C	47	4.72917	2.92026	0	1	0.723			AS to 5'/3' UTRs		3', Rv1546; 5', Rv1547	19	2
candidate_1819	1774782	1774812	-	C	30	4.51613	2.60786	0	0	0.444			Within 5'/3' UTRs	3', Rv1567c		162	48
candidate_1820	1799513	1799552	-	C	39	2.35	2.16914	0	0	0.83			AS to 5'/3' UTRs	5', Rv1598c	5', Rv1599	30	31
candidate_1821	1836831	1836892	-	C	61	17.8548	3.64236	1	0	0.533			Within 5'/3' UTRs	5', Rv1632c		1	183
candidate_1822	1852137	1852175	-	C	38	3.10256	2.58705	0	0	0.016			Intergenic			102	98
candidate_1823	1858651	1858698	-	C	47	8.79167	2.2527	0	0	0.715			AS to 5'/3' UTRs		5', Rv1649	114	35
candidate_1824	1921472	1921507	-	C	35	9.13889	4.13921	0	0	0.104			AS to 5'/3' UTRs		3', Rv1696; 5', Rv1697	26	35
candidate_1825	1923727	1923762	-	C	35	4.13889	4.223	0	1	0.164			AS to 5'/3' UTRs		3', Rv1698; 5', Rv1699	38	67
candidate_1826	1944760	1944802	-	C	42	0.116279	2.56046	0	1	0.137			AS to 5'/3' UTRs		3', Rv1717; 5', Rv1718	4	7
candidate_1827	2029752	2029783	-	C	31	21.4688	2.13765	0	1	0.021			Intergenic			275	121
candidate_1828	2047591	2047685	-	C	94	2.90526	2.90046	0	0	0.02			Within 5'/3' UTRs	3', Rv1805c		242	2
candidate_1829	2059467	2059541	-	C	74	0.32	2.47294	0	0	0.636			AS to 5'/3' UTRs		5', Rv1817	507	54
candidate_1830	2059544	2059593	-	C	49	0	2.41317	0	0	0.297			AS to 5'/3' UTRs		5', Rv1817	584	2
candidate_1831	2092158	2092188	-	C	30	10.2581	1.78578	1	0	0.684			Within 5'/3' UTRs	3', Rv1843c; 5', Rv1842c		73	71
candidate_1832	2096607	2096647	-	C	40	66.7073	2.06868	0	0	0.625			Within 5'/3' UTRs	5', Rv1846c		8	230
candidate_1833	2096772	2096820	-	C	48	19.9184	4.53575	0	0	0.57			AS to 5'/3' UTRs		5', Rv1847	173	57
candidate_1834	2104824	2104858	-	C	34	33.8286	1.78578	1	0	0.736			Within 5'/3' UTRs	5', Rv1856c		1	127
candidate_1835	2104902	2104937	-	C	35	113.25	2.5364	0	0	0.482			AS to 5'/3' UTRs		5', Rv1857	79	48
candidate_1836	2107697	2107734	-	C	37	1.02632	2.60786	1	1	0.447			AS to 5'/3' UTRs		3', Rv1859; 5', Rv1860	14	2
candidate_1837	2125083	2125133	-	C	50	18.5686	2.52591	1	1	0.689			Intergenic			259	207
candidate_1838	2378319	2378362	-	C	43	0	1.79607	1	0	0.902			AS to 5'/3' UTRs	5', Rv2118c	5', Rv2119	7	24
candidate_1839	2409571	2409673	-	C	102	104.049	3.32732	0	0	0.139			Within 5'/3' UTRs	3', Rv2151c; 5', Rv2150c		47	24
candidate_1840	2429883	2429933	-	C	50	7.01961	3.94803	0	0	0.41			Within 5'/3' UTRs	5', Rv2166c		25	226
candidate_1841	2446976	2447038	-	C	62	9.46032	2.09591	0	1	0.895			Within 5'/3' UTRs	3', Rv2185c; 5', Rv2184c		30	28
candidate_1842	2456854	2456896	-	C	42	8	4.85343	0	0	0.801			AS to 5'/3' UTRs		5', Rv2193	111	5
candidate_1843	2487531	2487592	-	C	61	40.3871	1.77192	1	0	0.962			AS to 5'/3' UTRs		5', Rv2220	115	23
candidate_1844	2516713	2516785	-	C	72	4.57534	5.4965	0	0	0.358			AS to 5'/3' UTRs		5', Rv2243	165	2
candidate_1845	2529954	2529990	-	C	36	12.8919	3.28297	0	0	0.934			Within 5'/3' UTRs	3', Rv2257c; 5', Rv2256c		80	14
candidate_1846	2531898	2532208	-	C	310	0.0353698	2.52325	1	0	0.001			AS to 5'/3' UTRs	5', Rv2258c	5', Rv2259	1	37
candidate_1847	2641158	2641191	-	C	33	5.52941	1.77192	0	0	0.015			AS to 5'/3' UTRs		5', Rv2358	94	55
candidate_1848	2644259	2644318	-	C	59	0.0333333	2.53843	0	0	0.759			AS to 5'/3' UTRs	5', Rv2362c	5', Rv2363	1	2
candidate_1849	2710005	2710038	-	C	33	3.70588	1.77192	0	0	0.931			AS to 5'/3' UTRs	5', Rv2411c	5', Rv2412	40	37
candidate_1850	2716322	2716386	-	C	64	0.184615	3.34477	0	0	0.637			Within 5'/3' UTRs	3', Rv2418c; 5', Rv2417c		8	9
candidate_1851	2740483	2740513	-	C	30	19.2903	3.96474	1	0	0.862			Intergenic			122	196
candidate_1852	2744985	2745155	-	C	170	14.8187	3.76428	0	1	0.066			Within 5'/3' UTRs	5', Rv2444c		1	159
candidate_1853	2745191	2745243	-	C	52	34.5283	2.56191	0	0	0.026			Within 5'/3' UTRs	3', Rv2445c		207	71
candidate_1854	2759647	2759704	-	C	57	18.3448	2.14013	0	0	0.118			AS to 5'/3' UTRs		5', Rv2458	159	75
candidate_1855	2771578	2771612	-	C	34	10.2	3.04317	0	0	0.132			AS to 5'/3' UTRs	3', Rv2468c	3', Rv2467	7	32
candidate_1856	2773046	2773084	-	C	38	0.102564	2.52407	0	0	0.358			Within 5'/3' UTRs	5', Rv2469c		11	94
candidate_1857	2824618	2824657	-	C	39	0.45	2.49332	0	0	0.068			AS to 5'/3' UTRs	5', Rv2508c	5', Rv2509	25	21
candidate_1858	2849540	2849574	-	C	34	1.37143	2.58424	0	0	0.803			Intergenic			208	278
candidate_1859	2849622	2849701	-	C	79	2.2875	4.68079	0	0	0.404			Intergenic			290	151
candidate_1860	2969672	2969751	-	C	79	15.1	2.15123	0	0	0.861			AS to 5'/3' UTRs		5', Rvnt32	104	2
candidate_1861	2990600	2990687	-	C	87	0	1.95241	1	1	0.078			AS to 5'/3' UTRs		3', Rv2673; 5', Rv2674	8	19
candidate_1862	2996009	2996103	-	C	94	0.157895	2.53747	0	1	0.138			AS to 5'/3' UTRs		3', Rv2679; 5', Rv2680	64	2
candidate_1863	3007063	3007219	-	C	156	0.10828	2.57336	0	0	0.451			Within 5'/3' UTRs	3', Rv2690c; 5', Rv2689c		1	17
candidate_1864	3014982	3015079	-	C	97	59.2653	3.0744	0	0	0.396			Within 5'/3' UTRs	5', Rv2699c		17	124
candidate_1865	3022326	3022371	-	C	45	1.6087	2.60786	0	1	0.462			AS to 5'/3' UTRs		3', Rv2709	41	90
candidate_1866	3023523	3023563	-	C	40	17.2439	1.78578	0	1	0.004			AS to 5'/3' UTRs		5', Rv2711	91	2
candidate_1867	3031591	3031662	-	C	71	0.555556	2.20208	0	0	0.205			Within 5'/3' UTRs	5', Rv2719c		54	183
candidate_1868	3051444	3051506	-	C	62	7.68254	2.83783	1	0	0.033			Within 5'/3' UTRs	5', Rv2737c		20	113
candidate_1869	3051522	3051564	-	C	42	6.62791	2.5345	0	1	0.439			AS to 5'/3' UTRs		5', Rv2737A	98	55
candidate_1870	3067156	3067190	-	C	34	0	2.35745	0	0	0.573			Within 5'/3' UTRs	3', Rv2754c; 5', Rv2753c		32	3
candidate_1871	3073078	3073128	-	C	50	0.803922	2.86462	0	0	0.173			Within 5'/3' UTRs	3', Rv2763c; 5', Rv2762c		22	2
candidate_1872	3074551	3074588	-	C	37	0	2.0797	0	1	0.112			AS to 5'/3' UTRs		5', Rv2765	80	48
candidate_1873	3092598	3092646	-	C	48	6.18367	2.30512	0	0	0.801			Within 5'/3' UTRs	5', Rv2783c		1	305
candidate_1874	3092694	3092902	-	C	208	7.56459	3.09061	1	0	0.024			Within 5'/3' UTRs	3', Rv2784c		97	49
candidate_1875	3147874	3147957	-	C	83	19.9643	3.7122	0	0	0.35			Within 5'/3' UTRs	3', Rv2840c; 5', Rv2839c		1	2
candidate_1876*	3148296	3148337	-	C	41	50.119	2.20868	1	0	0.758			to be excluded - within 3'/5' UTRs			38	48
candidate_1877	3155881	3156087	-	C	206	0	1.77192	1	0	0.017			Within 5'/3' UTRs	3', Rv2848c; 5', Rv2847c		10	61
candidate_1878	3192202	3192353	-	C	151	1.09868	2.49794	0	0	0.031			Within 5'/3' UTRs	3', Rv2883c; 5', Rv2882c		1	20
candidate_1879	3199999	3200063	-	C	64	19.6	3.32295	0	0	0.059			Within 5'/3' UTRs	5', Rv2890c		17	203
candidate_1880	3200135	3200176	-	C	41	9.42857	3.2596	1	1	0.039			Intergenic			153	90
candidate_1881	3215591	3215656	-	C	65	1.5303	3.11529	0	1	0.001			AS to 5'/3' UTRs	3', Rv2906c	3', Rv2905	19	9
candidate_1882	3217664	3217736	-	C	72	26	4.43903	0	0	0.028			Within 5'/3' UTRs	5', Rv2909c		21	91
candidate_1883	3232558	3232626	-	C	68	5	2.39967	1	0	0.104			Within 5'/3' UTRs	5', Rv2920c		52	245
candidate_1884	3232651	3232864	-	C	213	0	2.37937	0	0	0.003			Within 5'/3' UTRs	3', Rv2921c		145	7
candidate_1885	3239477	3239643	-	C	166	0	2.77935	0	0	0.035			Within 5'/3' UTRs	5', Rv2924c		7	186
candidate_1886	3239666	3239722	-	C	56	0	3.1103	0	1	0.299			Intergenic			196	107
candidate_1887	3241990	3242028	-	C	38	24.5897	4.80294	0	0	0.065			Within 5'/3' UTRs	5', Rv2927c		31	170
candidate_1888	3318816	3318855	-	C	39	3.175	2.27868	0	0	0.803			Within 5'/3' UTRs	3', Rv2966c; 5', Rv2965c		1	46
candidate_1889	3319505	3319582	-	C	77	0.230769	2.31985	0	0	0.781			Within 5'/3' UTRs	5', Rv2966c		38	81
candidate_1890	3336508	3336547	-	C	39	0	1.79607	0	1	0.382			AS to 5'/3' UTRs		3', Rv2980	3	249
candidate_1891	3336567	3336606	-	C	39	0	1.79607	0	0	0.405			AS to 5'/3' UTRs		3', Rv2980	62	190
candidate_1892	3336626	3336665	-	C	39	0	1.79607	0	0	0.381			Intergenic			121	131
candidate_1893	3336685	3336724	-	C	39	0.525	1.79607	0	0	0.387			Within 5'/3' UTRs	3', Rv2981c		180	72
candidate_1894	3336744	3336783	-	C	39	2.025	1.79607	0	0	0.425			Within 5'/3' UTRs	3', Rv2981c		239	13
candidate_1895	3343862	3343968	-	C	106	4.26168	3.95134	0	0	0.747			Within 5'/3' UTRs	3', Rv2987c; 5', Rv2986c		42	65
candidate_1896	3351097	3351142	-	C	45	0	1.77192	0	0	0.012			Intergenic			104	127
candidate_1897	3351153	3351198	-	C	45	0	1.77192	0	0	0.007			AS to 5'/3' UTRs		5', Rv2994	160	71
candidate_1898	3386923	3386992	-	C	69	6.35714	1.77192	0	0	0.016			Intergenic			109	83
candidate_1899	3388873	3388904	-	C	31	292.531	2.91812	0	0	0.122			Within 5'/3' UTRs	5', Rv3029c		3	197
candidate_1900	3388937	3389002	-	C	65	35.6212	2.58253	1	0	0.045			Within 5'/3' UTRs	5', Rv3029c		67	99
candidate_1901	3395268	3395320	-	C	52	0.509434	1.79424	0	1	0.319			AS to 5'/3' UTRs		5', Rv3035	347	59
candidate_1902	3540817	3540850	-	C	33	4	1.77192	1	0	0.045			Within 5'/3' UTRs	3', Rv3172c; 5', Rv3171c		72	32
candidate_1903	3551161	3551219	-	C	58	0.135593	3.18666	0	0	0.001			AS to 5'/3' UTRs		5', Rv3184	117	62
candidate_1904	3568769	3568804	-	C	35	16.1667	2.30512	0	0	0.001			Intergenic			90	305
candidate_1905	3572555	3572600	-	C	45	2.52174	2.29939	0	0	0.075			Within 5'/3' UTRs	3', Rv3200c; 5', Rv3199c		12	2
candidate_1906	3607064	3607098	-	C	34	70.8286	2.31567	1	0	0.001			Within 5'/3' UTRs	3', Rv3230c; 5', Rv3229c		30	14
candidate_1907	3626614	3626661	-	C	47	4.8125	2.33814	0	0	0.206			Within 5'/3' UTRs	3', Rv3246c; 5', Rv3245c		1	2
candidate_1908	3627350	3627394	-	C	44	0.488889	2.59163	0	0	0.699			Within 5'/3' UTRs	3', Rv3247c; 5', Rv3246c		1	25
candidate_1909	3725968	3726104	-	C	136	5.45985	4.6238	0	0	0.251			AS to 5'/3' UTRs		5', Rv3340	124	23
candidate_1910	3777624	3777656	-	C	32	2.45455	2.8067	0	1	0.767			Intergenic			123	81
candidate_1911	3820410	3820442	-	C	32	2.57576	1.78081	0	1	0.275			AS to 5'/3' UTRs		3', Rv3401	8	211
candidate_1912	3820457	3820499	-	C	42	1.02326	2.49234	0	0	0.032			AS to 5'/3' UTRs		3', Rv3401	55	154
candidate_1913	3820517	3820558	-	C	41	3.09524	2.16565	0	0	0.058			Intergenic			115	95
candidate_1914	3835203	3835261	-	C	58	17.0169	2.69509	0	0	0.001			AS to 5'/3' UTRs	3', Rv3417c	3', Rv3416	3	11
candidate_1915	3836919	3836979	-	C	60	60.7541	3.23359	0	0	0.001			Within 5'/3' UTRs	3', Rv3418c; 5', Rv3417c		28	7
candidate_1916	3837459	3837502	-	C	43	8.43182	5.19565	0	1	0.012			Within 5'/3' UTRs	3', Rv3419c		171	53
candidate_1917	3862457	3862593	-	C	136	25.5255	2.45603	0	0	0.019			Within 5'/3' UTRs	3', Rv3444c; 5', Rv3443c		67	31
candidate_1918	3922326	3922369	-	C	43	3.02273	3.59818	0	0	0.081			Within 5'/3' UTRs	5', Rv3503c		70	102
candidate_1919	3957390	3957421	-	C	31	24.3125	4.22003	0	0	0.413			Within 5'/3' UTRs	5', Rv3520c		22	100
candidate_1920	3985477	3985550	-	C	73	31.9595	4.58682	0	0	0.178			AS to 5'/3' UTRs	5', Rv3545c	5', Rv3546	32	7
candidate_1921	3989099	3989134	-	C	35	0.916667	5.10825	0	0	0.016			AS to 5'/3' UTRs	5', Rv3549c	5', Rv3550	1	19
candidate_1922	3991532	3991565	-	C	33	2.32353	3.68347	0	1	0.579			AS to 5'/3' UTRs		3', Rv3552; 5', Rv3553	9	56
candidate_1923	4001590	4001626	-	C	36	1.08108	4.88207	0	0	0.031			AS to 5'/3' UTRs	5', Rv3560c	5', Rv3561	1	11
candidate_1924	4012301	4012393	-	C	92	3.26882	3.08637	0	0	0.002			AS to 5'/3' UTRs	5', Rv3570c	5', Rv3571	31	24
candidate_1925	4016369	4016409	-	C	40	9.68293	2.13516	0	0	0.261			AS to 5'/3' UTRs		5', Rv3574	157	75
candidate_1926	4025545	4025621	-	C	76	544.377	2.7828	0	0	0.035			Within 5'/3' UTRs	5', Rv3583c		1	209
candidate_1927	4040749	4040797	-	C	48	22.1429	2.77198	0	0	0.153			Within 5'/3' UTRs	5', Rv3596c		45	184
candidate_1928	4041368	4041412	-	C	44	29.6222	2.42518	0	0	0.621			Within 5'/3' UTRs	3', Rv3698c; 5', Rv3597c		49	11
candidate_1929	4046119	4046158	-	C	39	18.475	2.40308	1	0	0.936			Within 5'/3' UTRs	5', Rv3603c		1	145
candidate_1930	4047497	4047550	-	C	53	0.037037	2.02735	0	0	0.674			Within 5'/3' UTRs	5', Rv3604c		1	155
candidate_1931	4087370	4087425	-	C	55	9.92857	1.78578	1	0	0.986			Intergenic			113	185
candidate_1932	4088532	4088646	-	C	114	9.57391	4.25928	0	0	0.363			Within 5'/3' UTRs	5', Rv3648c		1	135
candidate_1933	4088711	4088743	-	C	32	2.87879	2.96929	0	0	0.819			AS to 5'/3' UTRs		5', Rv3649	180	38
candidate_1934	4100669	4100704	-	C	35	57.0556	3.03762	0	1	0.443			Intergenic			159	561
candidate_1935	4100792	4100859	-	C	67	21.8971	3.05896	0	0	0.366			Intergenic			282	406
candidate_1936	4115941	4115989	-	C	48	13.0408	2.46924	0	0	0.259			AS to 5'/3' UTRs	5', Rv3674c	5', Rv3675	47	13
candidate_1937	4134608	4134656	-	C	48	0.918367	3.2361	0	1	0.752			AS to 5'/3' UTRs		3', Rv3692; 5', Rv3693	16	70
candidate_1938	4153619	4153717	-	C	98	88.5657	5.1765	0	1	0.292			AS to 5'/3' UTRs	5', Rv3709c	5', Rv3710	136	143
candidate_1939	4156803	4156848	-	C	45	0	1.79607	0	0	0.013			Within 5'/3' UTRs	5', Rv3711c		74	133
candidate_1940	4156862	4156907	-	C	45	0	1.79607	0	0	0.021			AS to 5'/3' UTRs		5', Rv3712	133	74
candidate_1941	4156921	4156975	-	C	54	0.109091	2.48175	0	0	0.012			AS to 5'/3' UTRs		5', Rv3712	192	6
candidate_1942	4160975	4161010	-	C	35	6.36111	1.77192	1	0	0.58			AS to 5'/3' UTRs	5', Rv3716c	5', Rv3717	62	38
candidate_1943	4200242	4200283	-	C	41	0.904762	2.43997	0	0	0.597			Within 5'/3' UTRs	5', Rv3753c		21	138
candidate_1944	4217093	4217128	-	C	35	0.5	1.78578	0	0	0.707			AS to 5'/3' UTRs	5', Rvnt44	5', Rv3772	37	6
candidate_1945	4273590	4273663	-	C	73	36.6622	2.32078	0	0	0.002			AS to 5'/3' UTRs		5', Rv3810	115	76
candidate_1946	4316731	4316762	-	C	31	4.03125	4.32864	0	1	0.706			Intergenic			135	2013
candidate_1947	4322177	4322219	-	C	42	122.023	1.84695	0	0	0.224			Intergenic			106	107
candidate_1948	4323403	4323453	-	C	50	12.4902	2.66367	0	0	0.347			AS to 5'/3' UTRs		5', Rv3849	169	46
candidate_1949	4348725	4348823	-	C	98	0.111111	2.5572	0	0	0.377			AS to 5'/3' UTRs		3', Rv3870; 5', Rv3871	1	4
									*TRIT
