# Supplementary material for: Genome-Wide Discovery of Small RNAs in Mycobacterium tuberculosis
Source: PLoS One. 2012 Dec 19;7(12):e51950. doi: 10.1371/journal.pone.0051950 (PMC3526491; doi:10.1371/journal.pone.0051950)
Supplement: Table S2 — Functional categories of genes showing RNA species within the 5′ UTR. Classification was performed according to TubercuList. (XLSX) [file pone.0051950.s008.xlsx]

## Sheet: Foglio1
Functional category	Genes
cell wall processes	Rv0206c, Rv3876, Rv0282, Rv1072, Rv1174c, Rv2169c, Rv2376c, Rv1184c, Rv2477c, Rv1009
intermediary metabolism	Rv0046c, Rv3003c, Rv2457c, Rv2584c, Rv2200c, Rv3206c, Rv1177, Rv1173, Rv3710, Rv1928c
information pathways	Rv3053c, Rv3597c, Rv1981c, Rv2357c, Rv3241c, Rv2703, Rv3211, Rv0682, Rv3048c
PE/PPE	Rv1169c, Rv1646, Rv1195, Rv2396, Rv2430c, Rv3136
virulence, detoxification and adaptation	Rv3269, Rv1566c, Rv2623, Rv0277c, Rv0384c, Rv0350, Rv3418c
lipid metabolism	Rv2244, Rv1886c, Rv3130c, Rv2940c
