# Supplementary material for: Genome-Wide Discovery of Small RNAs in Mycobacterium tuberculosis
Source: PLoS One. 2012 Dec 19;7(12):e51950. doi: 10.1371/journal.pone.0051950 (PMC3526491; doi:10.1371/journal.pone.0051950)
Supplement: Table S3 — Functional enrichment of cis- regulated genes. (XLS) [file pone.0051950.s009.xls]

## Sheet: Sheet1
Term	Description	Genes	Total Genes	p-value
GO:0006796	phosphate metabolic process	pknD,ppa,kdpD,atpH,atpA,atpB,senX3,	7	0.0066
GO:0015078	hydrogen ion transmembrane transporter activity	pntB,atpH,atpA,atpB,	4	0.0097
GO:0043284	biopolymer biosynthetic process	polA,rpmI,lysS,infC,cysS,rplQ,rpsD,rpoA,rpoC,ideR,Rv3277,phoP,gatB,	13	0.0117
GO:0019538	protein metabolic process	rpmI,pepD,lysS,Rv0950c,infC,pknD,kdpD,senX3,cysS,rplQ,rpsD,Rv1215c,Rv1216c,PE26,gatB,	15	0.014
GO:0044271	nitrogen compound biosynthetic process	trpE,dapB,	2	0.0153
GO:0006793	phosphorus metabolic process	pknD,ppa,kdpD,atpH,atpA,atpB,senX3,	7	0.0156
GO:0044425	membrane part	lysS,Rv1813c,pstS2,Rv3645,Rv1989c,kdpD,Rv1200,mmpS4,Rv0290,Rv0284,mmpL3,Rv0188,pntB,atpH,atpA,atpB,oppB,lprA,lprQ,senX3,secF,Rv0497,lppJ,mmpL7,Rv1216c,Rv3277,	26	0.0178
GO:0015077	monovalent inorganic cation transmembrane transporter activity	pntB,atpH,atpA,atpB,	4	0.0187
GO:0005886	plasma membrane	lysS,Rv1813c,pstS2,Rv1989c,kdpD,mmpL3,atpH,atpA,atpB,oppB,lprA,senX3,secF,Rv0497,lppJ,mmpL7,	16	0.0194
GO:0046933	hydrogen ion transporting ATP synthase activity, rotational mechanism	atpH,atpA,atpB,	3	0.0208
GO:0031224	intrinsic to membrane	lysS,Rv1813c,pstS2,Rv3645,Rv1989c,kdpD,Rv1200,mmpS4,Rv0290,Rv0284,mmpL3,Rv0188,pntB,atpH,atpB,oppB,lprA,lprQ,senX3,secF,Rv0497,lppJ,mmpL7,Rv1216c,Rv3277,	25	0.022
GO:0045259	proton-transporting ATP synthase complex	atpH,atpA,atpB,	3	0.0266
GO:0016020	membrane	lysS,Rv1813c,pstS2,Rv3645,Rv1863c,Rv1989c,kdpD,Rv1200,mmpS4,Rv0290,Rv0284,mmpL3,Rv0188,pntB,atpH,atpA,atpB,oppB,lprA,lprQ,senX3,secF,Rv0497,lppJ,mmpL7,Rv1216c,Rv3277,	27	0.0308
GO:0006818	hydrogen transport	atpH,atpA,atpB,	3	0.0335
GO:0015992	proton transport	atpH,atpA,atpB,	3	0.0341
GO:0016310	phosphorylation	pknD,kdpD,atpH,atpA,atpB,senX3,	6	0.037
GO:0044267	cellular protein metabolic process	rpmI,lysS,infC,pknD,kdpD,senX3,cysS,rplQ,rpsD,Rv1216c,gatB,	11	0.0389
GO:0051171	regulation of nitrogen compound metabolic process	Rv2657c,Rv3583c,ideR,phoP,	4	0.0405
GO:0015986	ATP synthesis coupled proton transport	atpH,atpA,atpB,	3	0.0442
GO:0016469	proton-transporting two-sector ATPase complex	atpH,atpA,atpB,	3	0.0442
GO:0015985	energy coupled proton transport, down electrochemical gradient	atpH,atpA,atpB,	3	0.0449
GO:0010556	regulation of macromolecule biosynthetic process	Rv2657c,Rv3583c,ideR,phoP,	4	0.0457
GO:0034220	ion transmembrane transport	atpH,atpA,atpB,	3	0.0491
TBL_0	virulence, detoxification, adaptation	Rv1103c,Rv1102c,yrbE1A,otsB1,	4	0.0628
TBL_1	lipid metabolism	acs,fadA2,fadA4,nrp,ppsC,fadE34,TB7.3,tgs1,	8	0.4198
TBL_10	conserved hypotheticals	Rv2312,Rv1734c,Rv1887,Rv0950c,Rv1147,Rv1813c,Rv0923c,Rv1804c,Rv1989c,Rv1205,Rv3847,Rv3876,Rv0289,Rv1428c,Rv0207c,Rv1334,Rv1335,Rv0047c,Rv1265,Rv3521,Rv3519,Rv0530,Rv2023c,Rv2706c,Rv2956,Rv1215c,Rv2082,Rv2114,Rv0611c,Rv2929,cpsA,Rv2663,Rv2050,Rv2525c,Rv2023A,	35	0.1655
TBL_2	information pathways	polA,rpmI,lysS,infC,Rv3649,gyrB,rplQ,rpsD,rpoA,rpoC,gatB,Rv3221A,	12	0.1722
TBL_3	cell wall and cell processes	Rv3675,pstS2,Rv0842,Rv3645,Rv1863c,Rv1779c,mpt64,Rv1200,glf,mmpS4,Rv0412c,Rv0290,Rv0284,mmpL3,Rv0188,oppB,Rv0076c,lprA,Rv1233c,lprQ,secF,Rv0497,Rv2115c,lppZ,lppJ,Rv0531,mmpL7,lpqN,Rv2477c,Rv2180c,Rv1216c,Rv3277,	33	0.1538
TBL_5	insertion seqs and phages	Rv3640c,Rv1148c,Rv1583c,Rv2657c,Rv3191c,	5	0.4266
TBL_6	PE/PPE	PE_PGRS30,PE25,PPE18,PE_PGRS3,PPE2,PE_PGRS21,PE_PGRS52,PE26,PE31,	8	0.2089
TBL_7	intermediary metabolism and respiration	trpE,pepD,Rv3684,gcvB,bfrA,ppa,fbiC,trxB2,trxC,nadB,pntB,atpH,atpA,atpB,cysN,ino1,kgd,lipN,panB,Rv0539,cysS,guaB2,guaB3,Rv0636,dapB,cyp126,	26	0.1264
TBL_9	regulatory proteins	pknD,kdpD,TB39.8,Rv0485,senX3,Rv3583c,ideR,phoP,	8	0.498
mtu02020	Two-component system	pepD,pstS2,kdpD,fadA2,fadA4,senX3,	6	0.0363
mtu00230	Purine metabolism	polA,cysN,guaB2,guaB3,rpoA,rpoC,	6	0.0732
