# Supplementary material for: Genome-Wide Discovery of Small RNAs in Mycobacterium tuberculosis
Source: PLoS One. 2012 Dec 19;7(12):e51950. doi: 10.1371/journal.pone.0051950 (PMC3526491; doi:10.1371/journal.pone.0051950)
Supplement: Table S5 — List of other oligonucleotides used for the primer extension. DAVID database and TubercuList have been used for functional annotation of MTB genes. GO: gene onthology; mtu: KEGG pathway. TBL: TubercuList. (XLSX) [file pone.0051950.s011.xlsx]

## Sheet: M&M_Suppl4
Oligonucleotide	Sequence (5'-3')
candidate_498 Rev	CCC AGG GTT CTT ATG GTT CGA TA
candidate_498 Fwd	GAC TCC AGC AGC ACC ACG
candidate_1137 Rev	CGG TGA CCG CGG CAT TGT T
candidate_1137 Fwd	CCG AAA CCA TCC CGG CCA
candidate_1502 Rev	CCA GCT CAG CTG CTG CAC GA
candidate_1502 Fwd	CGC TCG CGG ATC AAG ACT
candidate_1565 Rev	GTC GCG GGT GCC GAC GCA
candidate_1565 Fwd	GGA GCG CCG CCG TCG CCG
candidate_1080 Rev	CCC TGT CCG AAG ACA CGA
candidate_1080 Fwd	TGA TCG GCG CGG TCG ACT
candidate_488 Rev	CCC ATT CCC GCT CAG TAG GA
candidate_488 Fwd	GTC GCG TCG TGG GTG GCG
